# Supplementary material
Source: publisher site journal article supplement (https://www.dovepress.com/article/552840)
Supplement: Supplementary file 1 [file Supplementary%20Materials.docx]

S1(a)


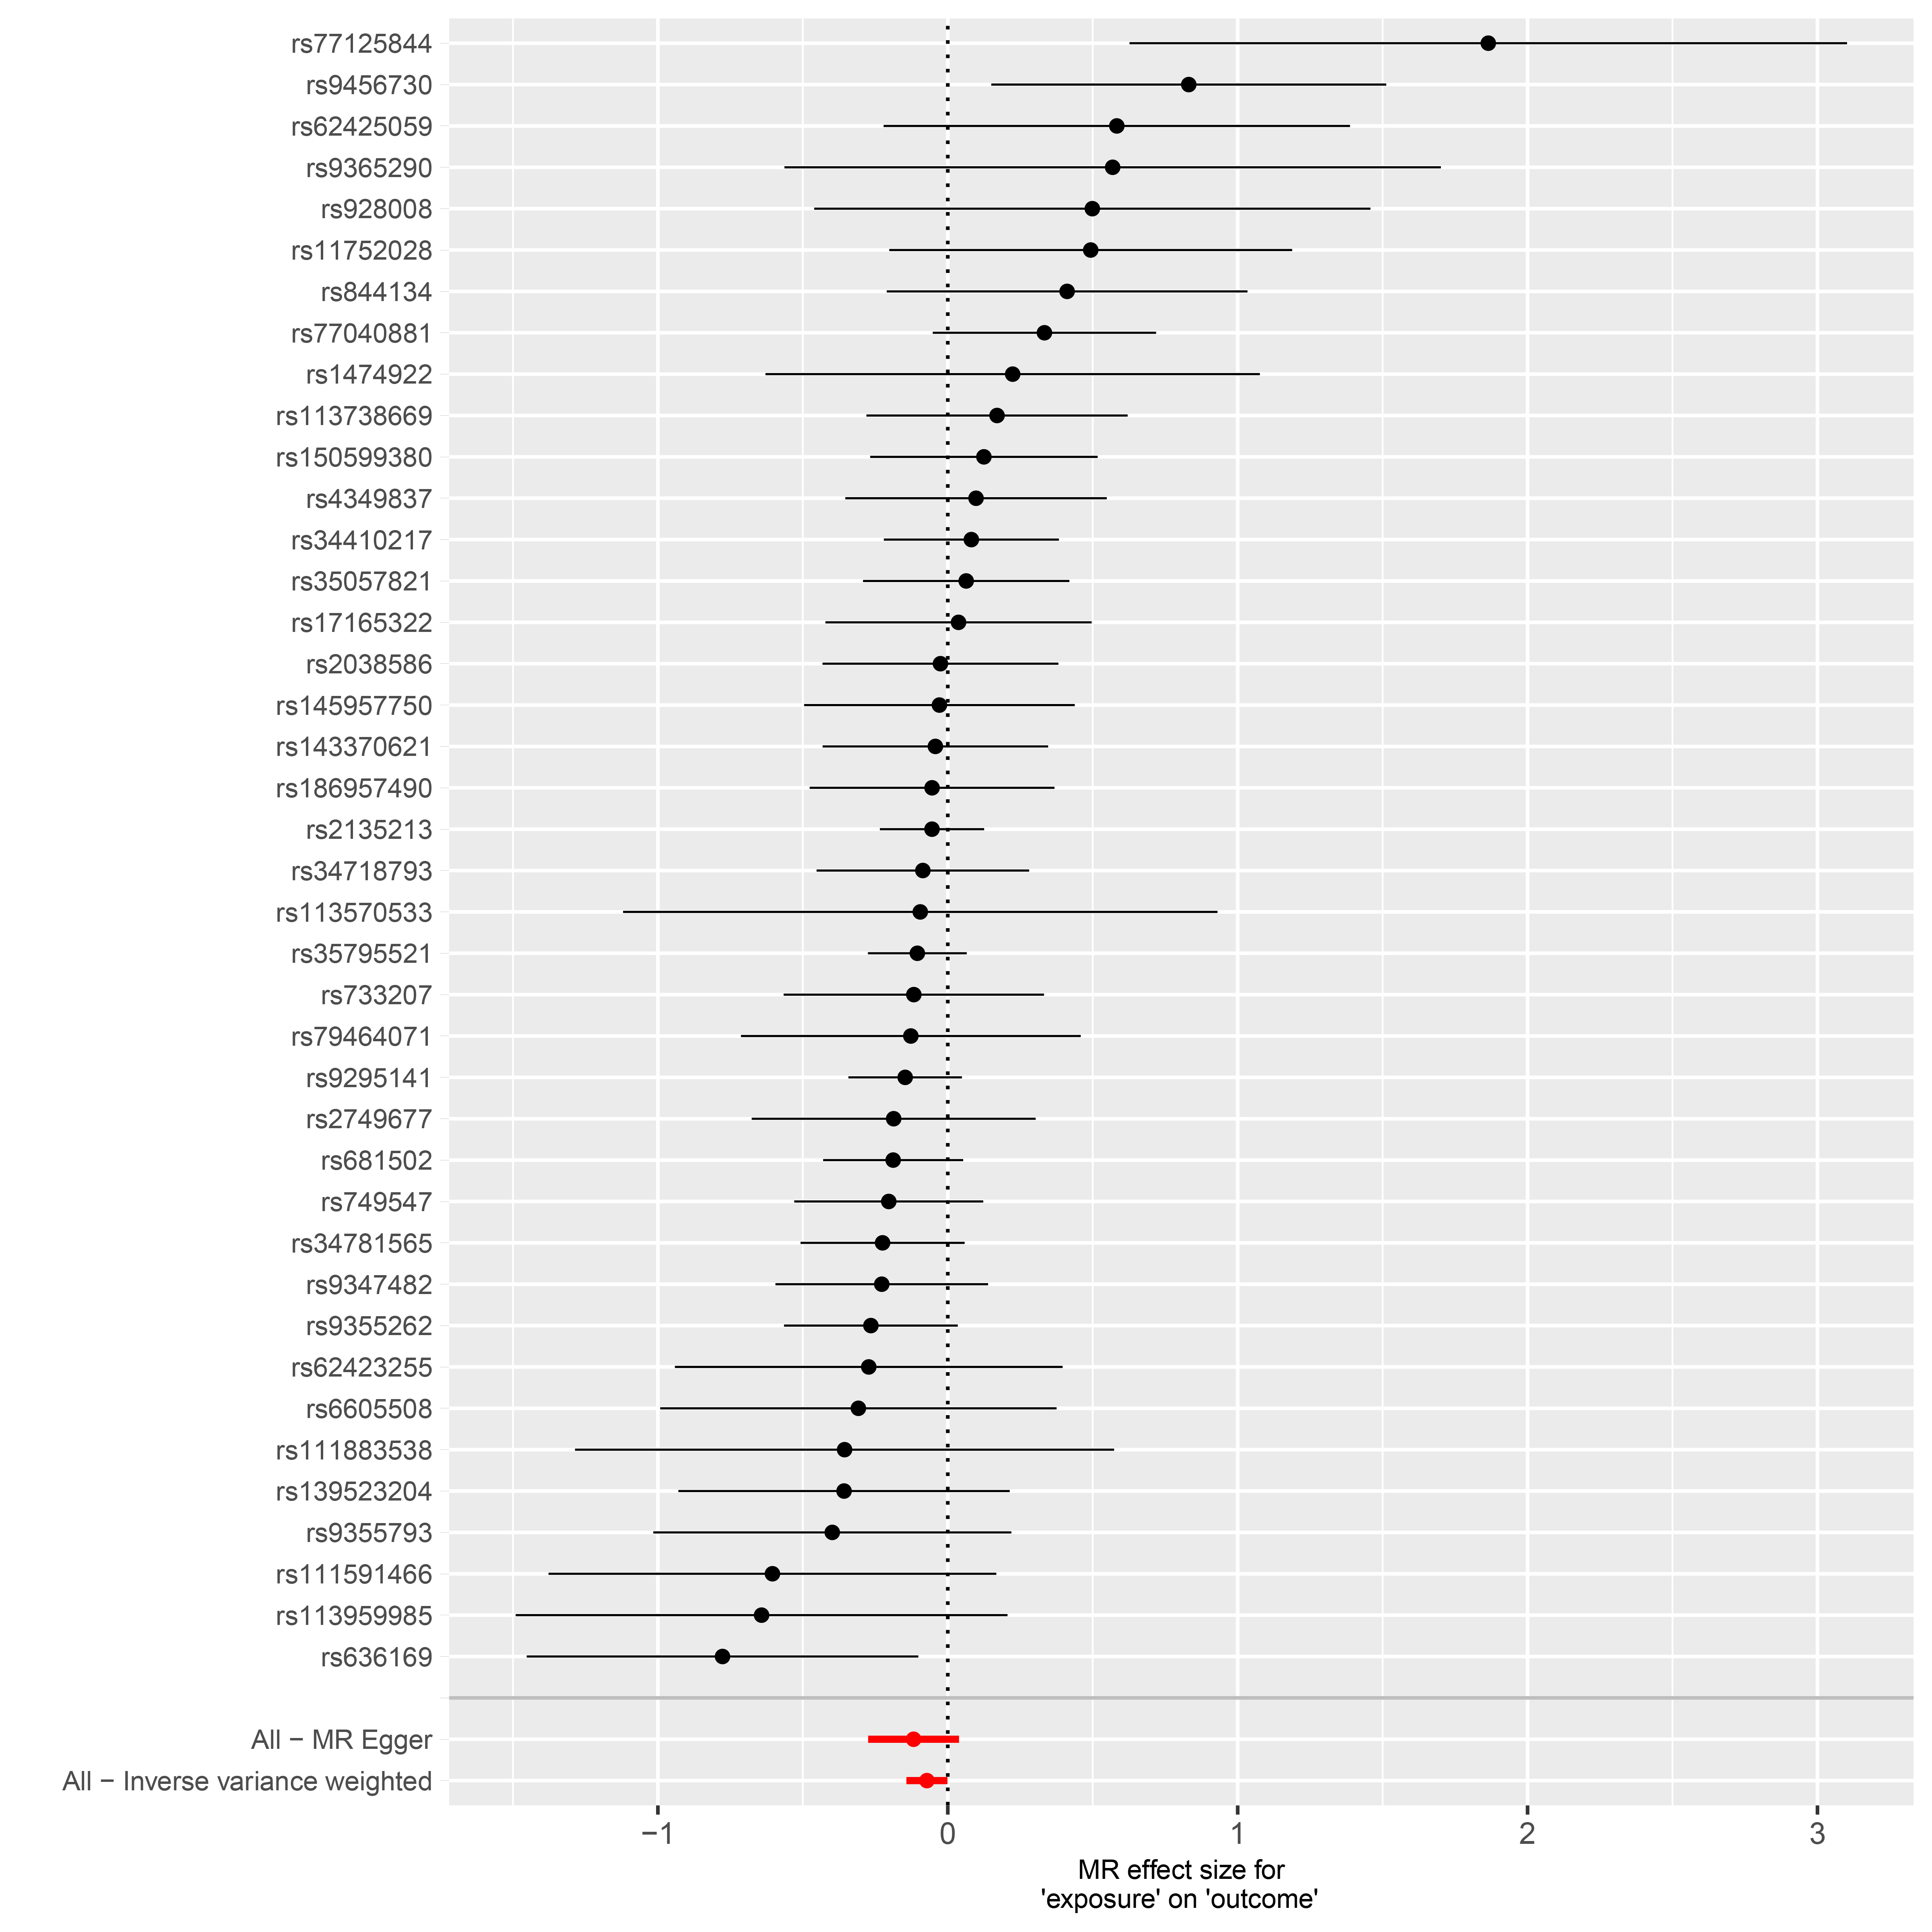


S1(b)


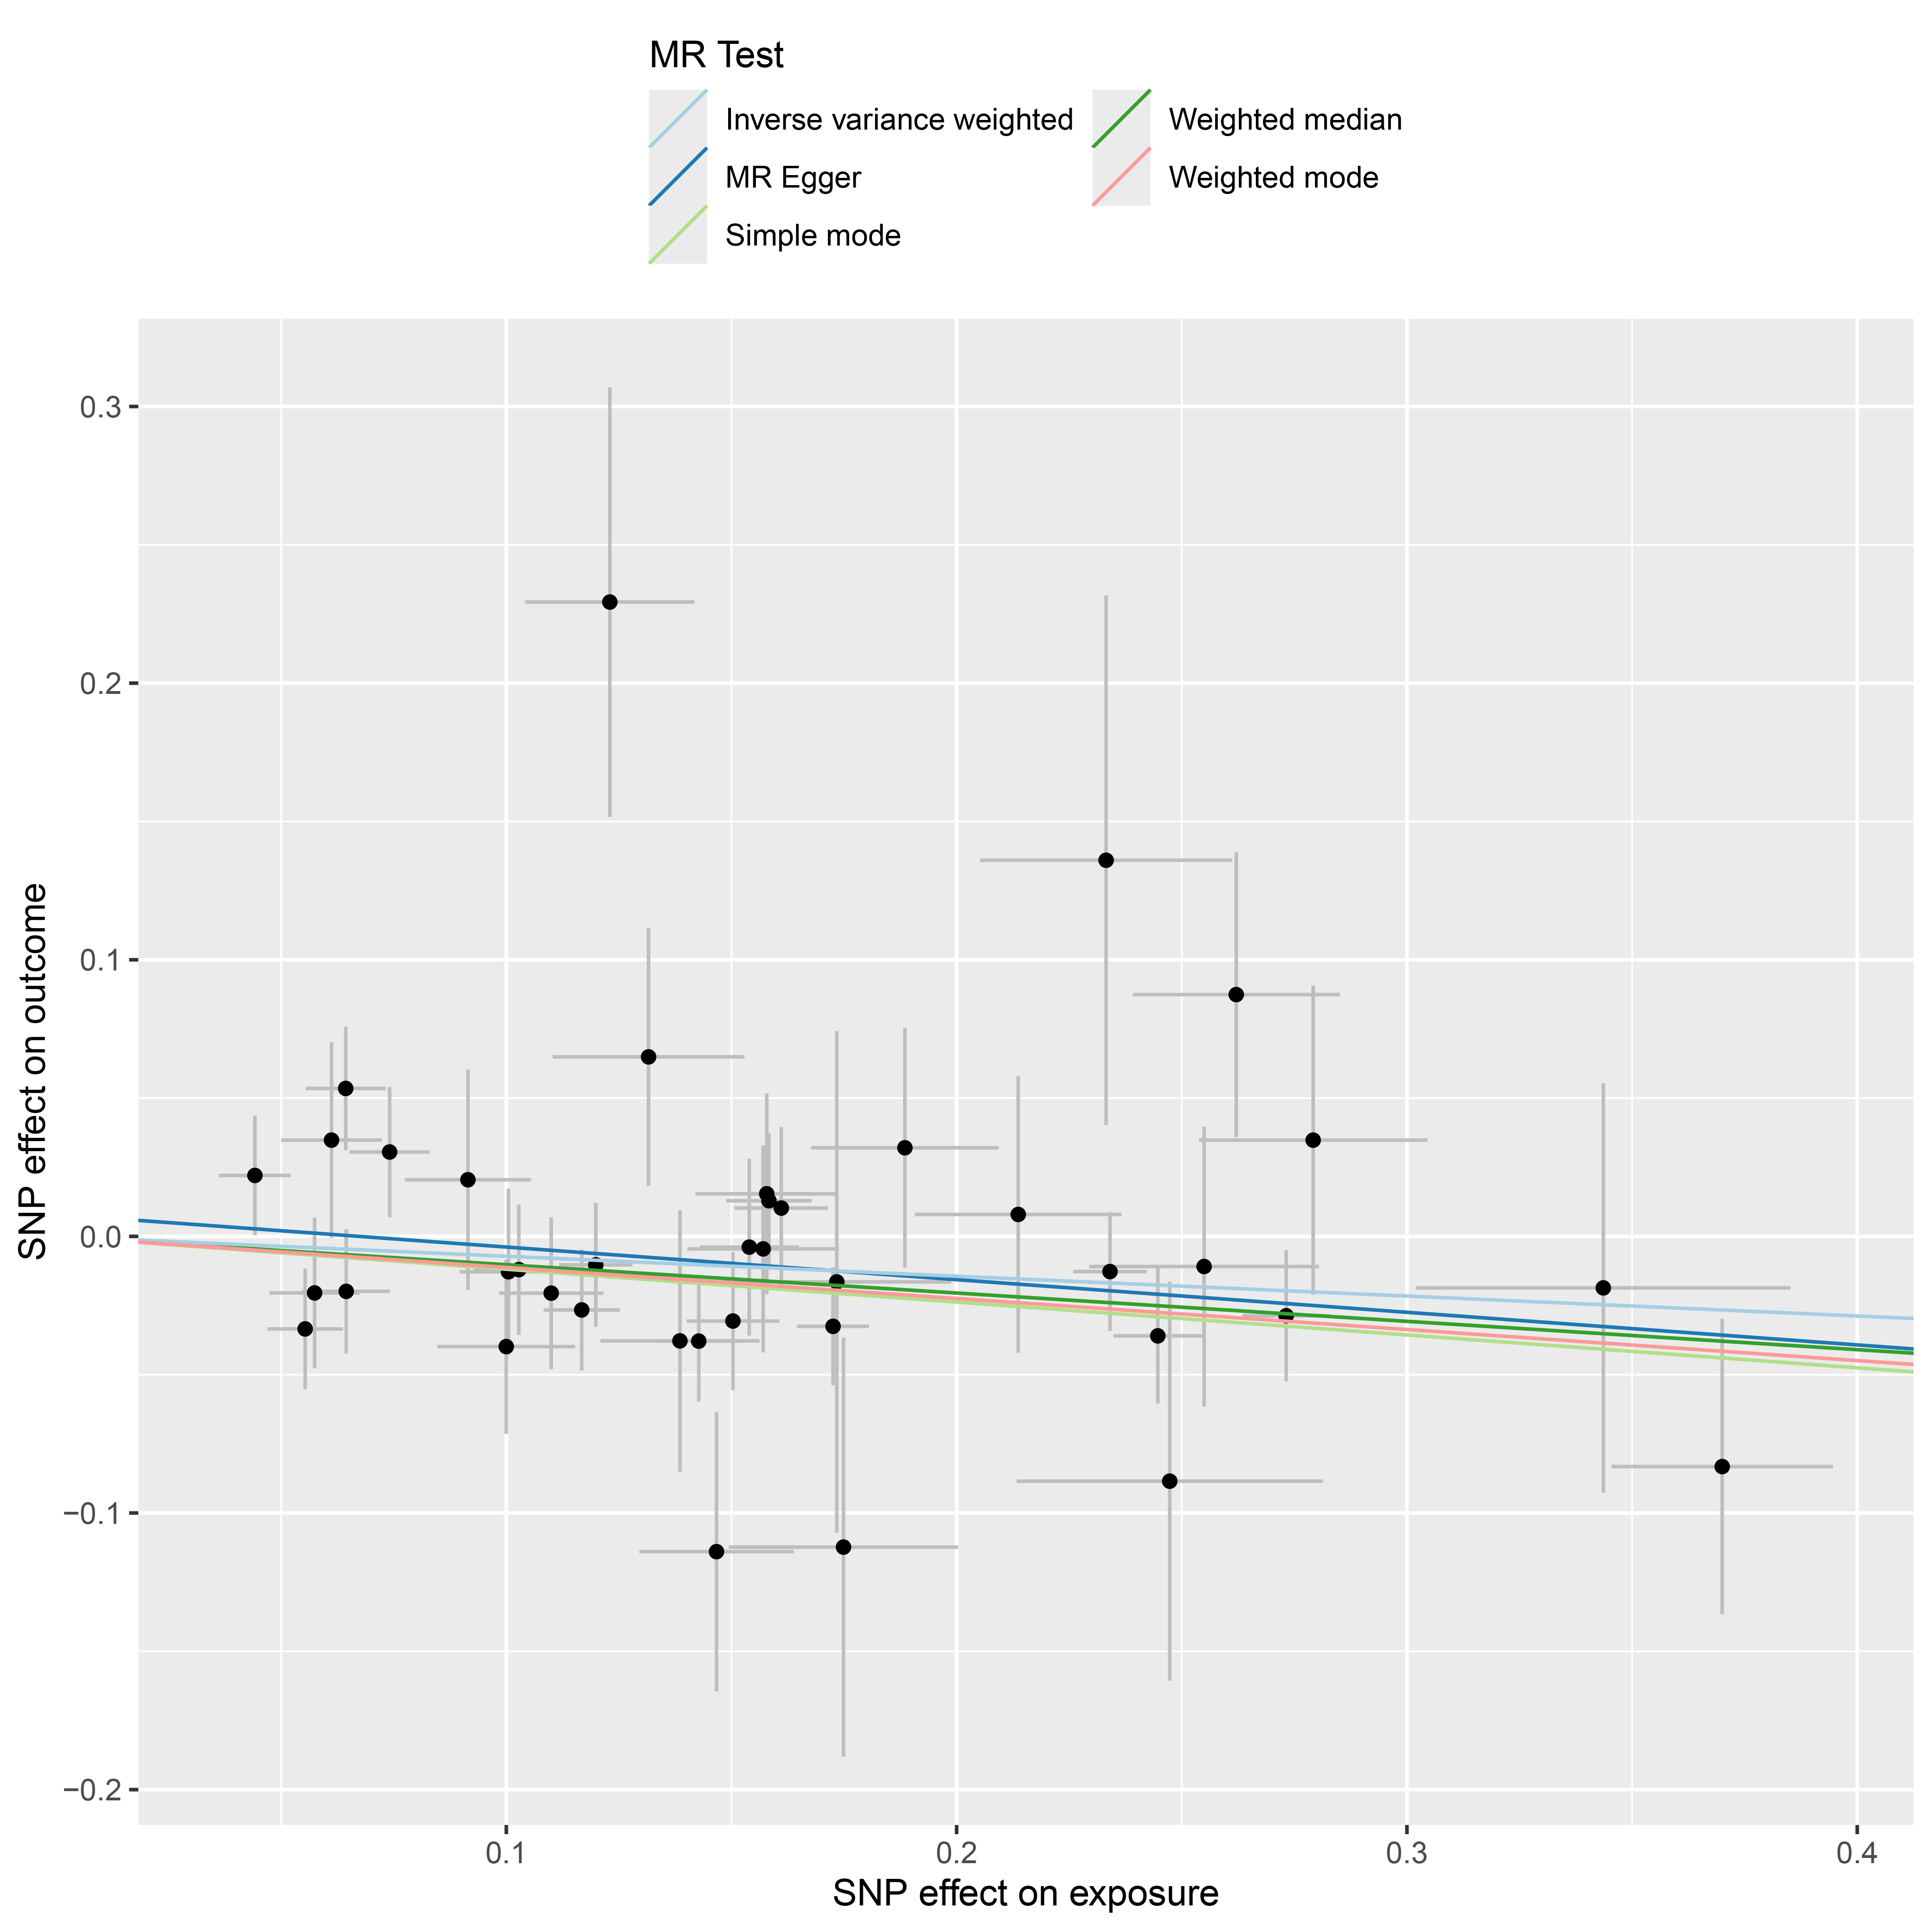


S1(c)


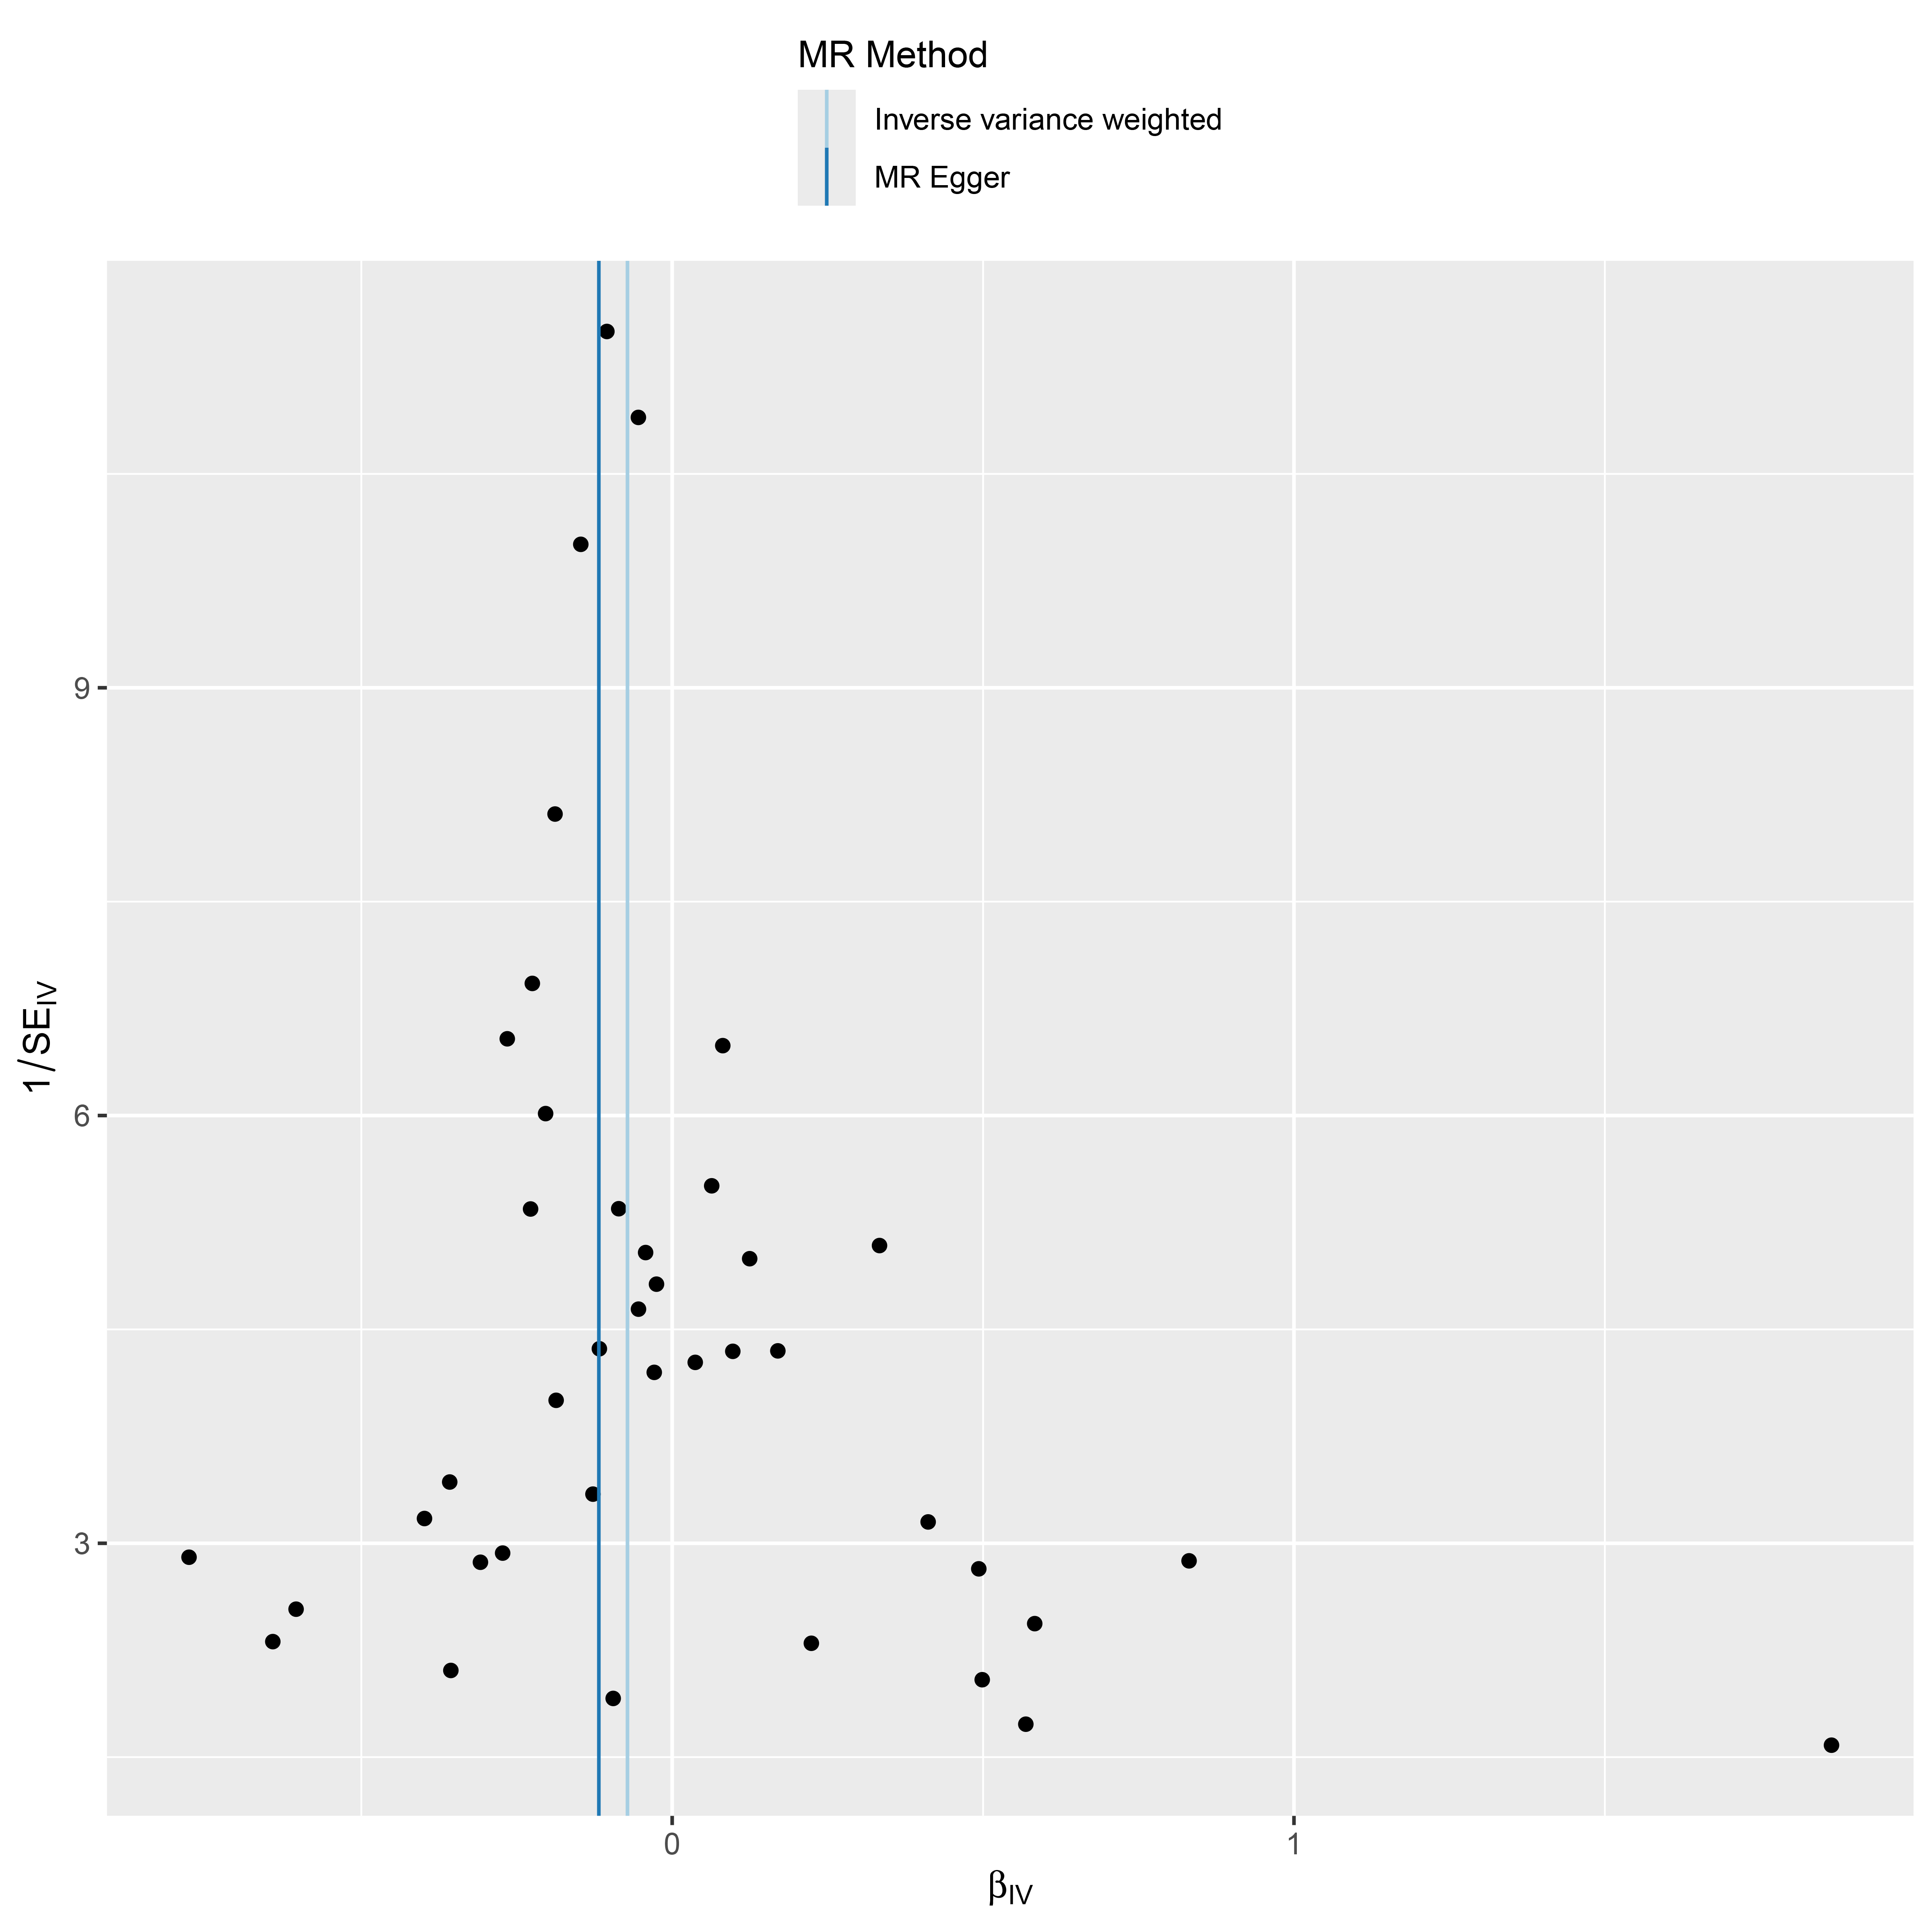


S1(d)


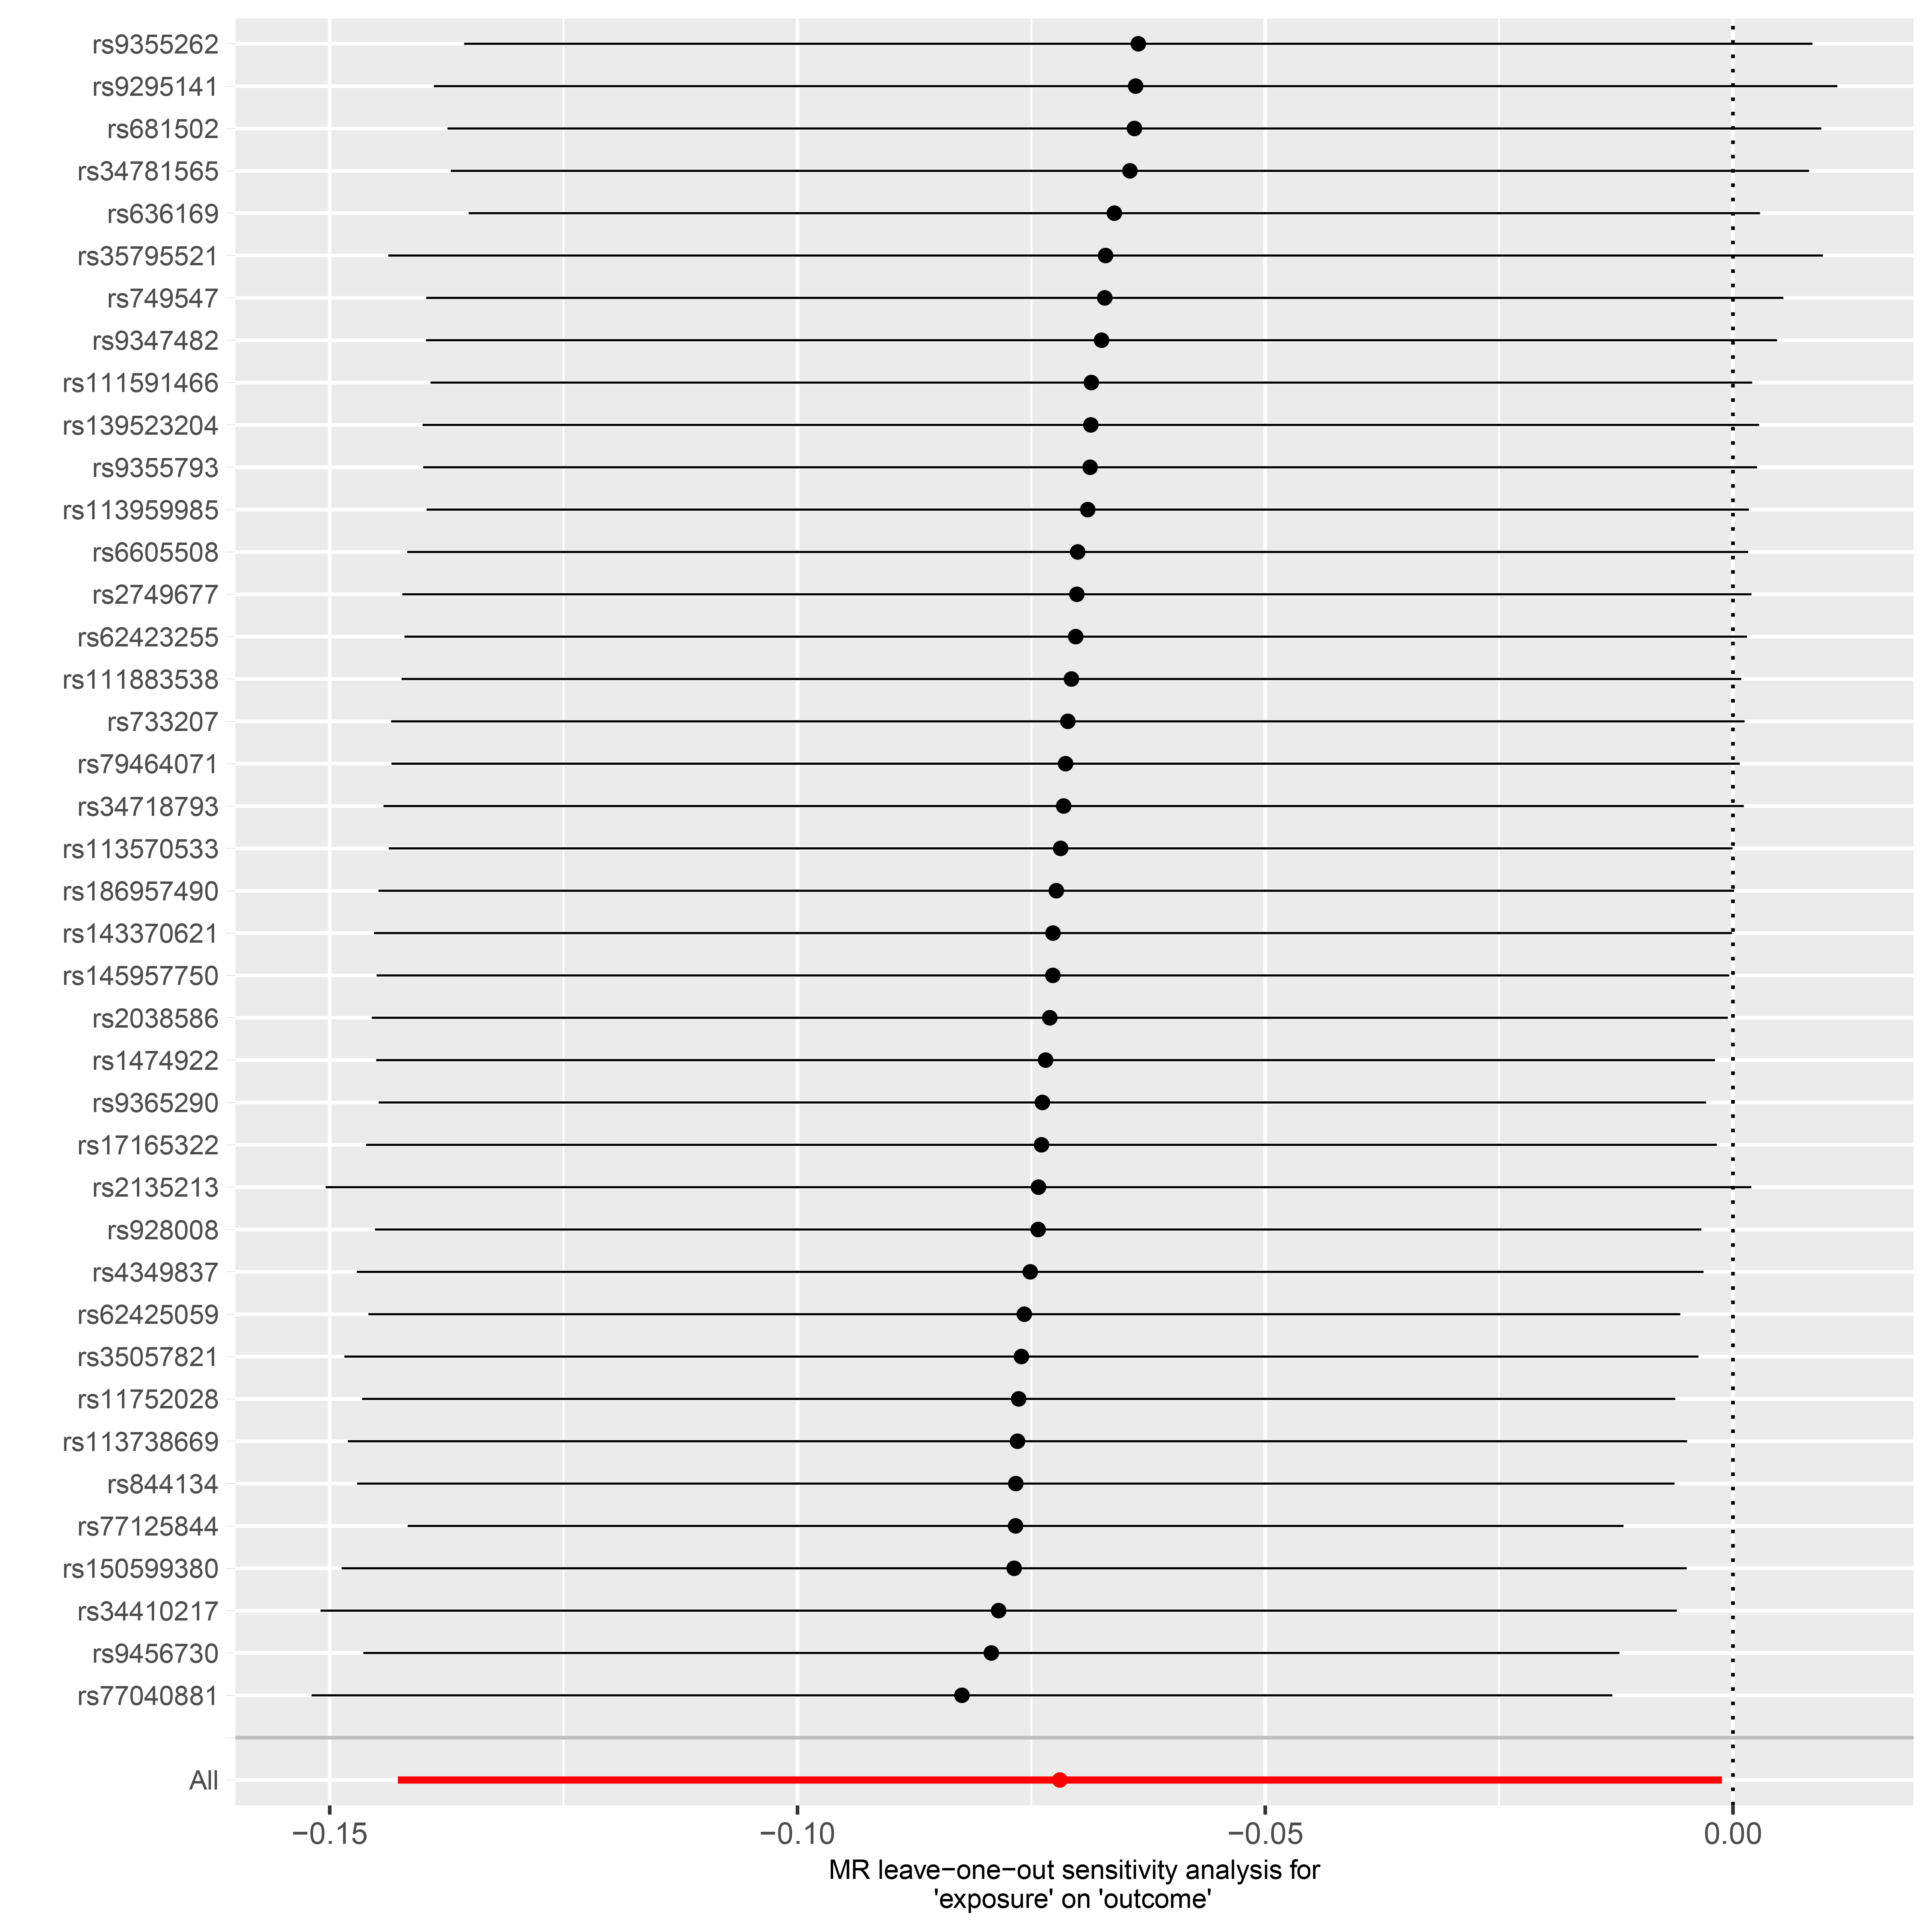


Supplementary Figure S1. Forest plot (a), scatter plot (b), funnel plot (c) and sensitivity analysis (d) of SNPs associated with ZDHHC14 on Acne vulgaris.

S2(a)


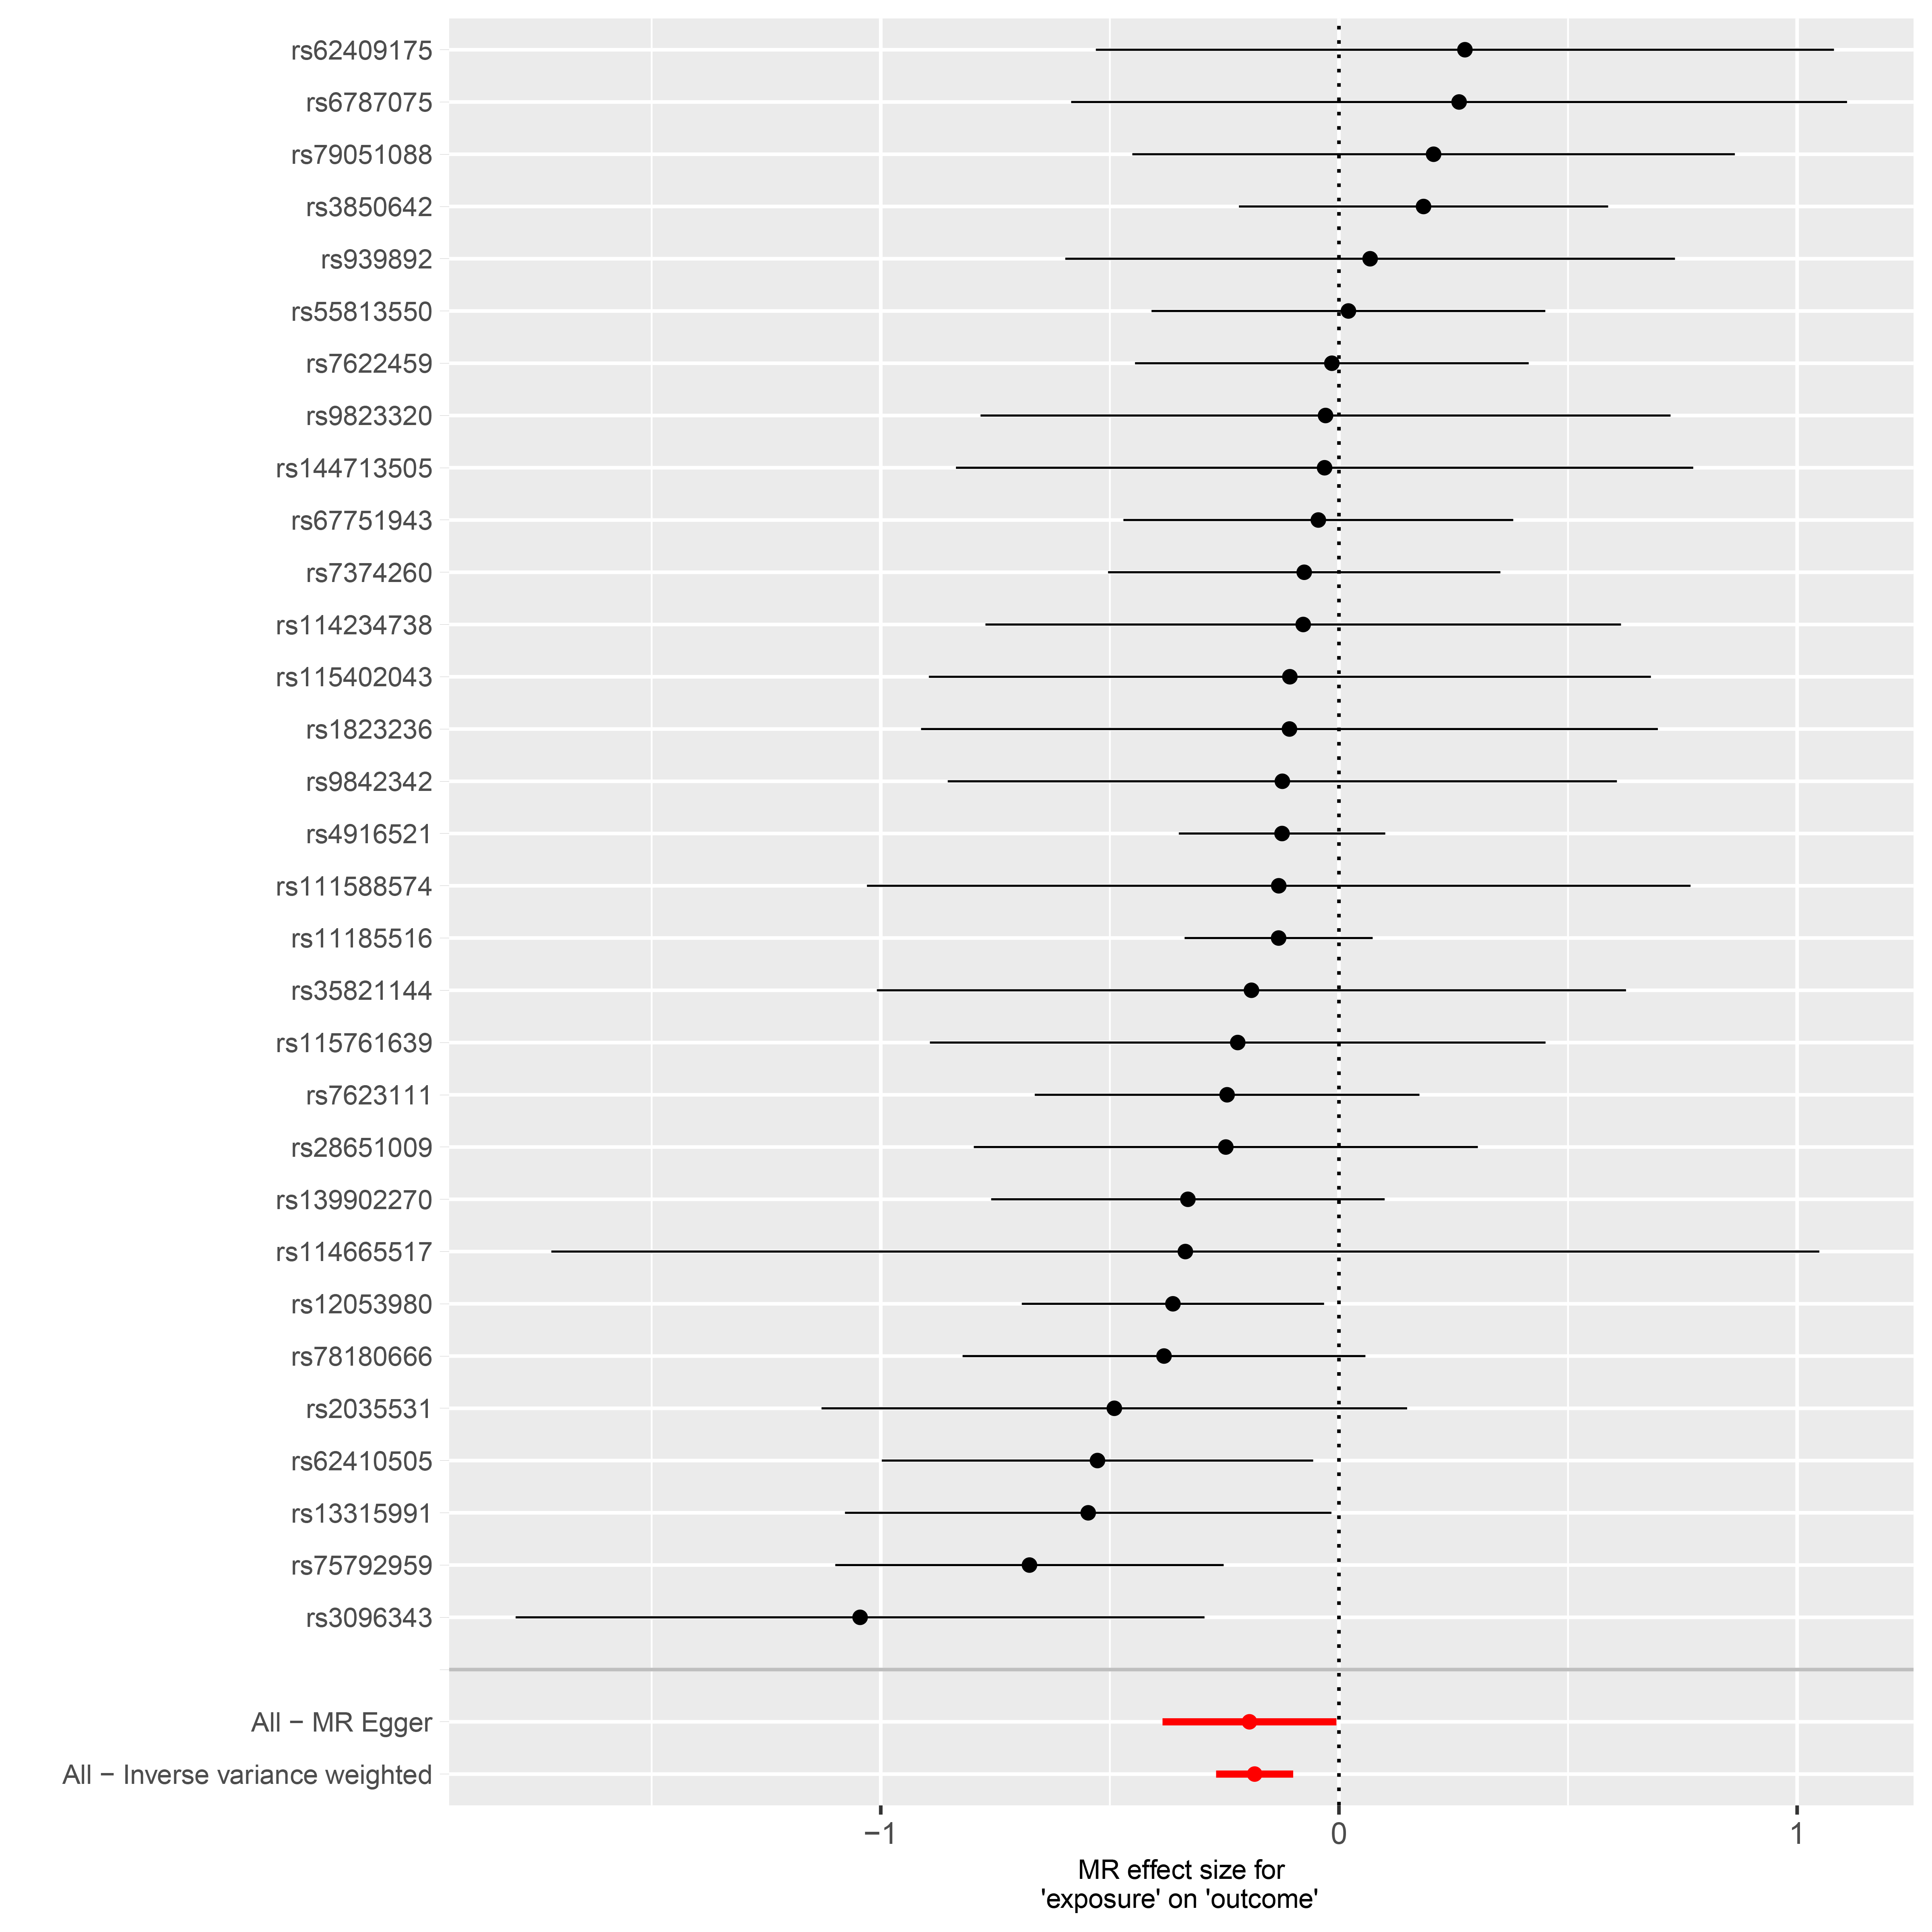


S2(b)


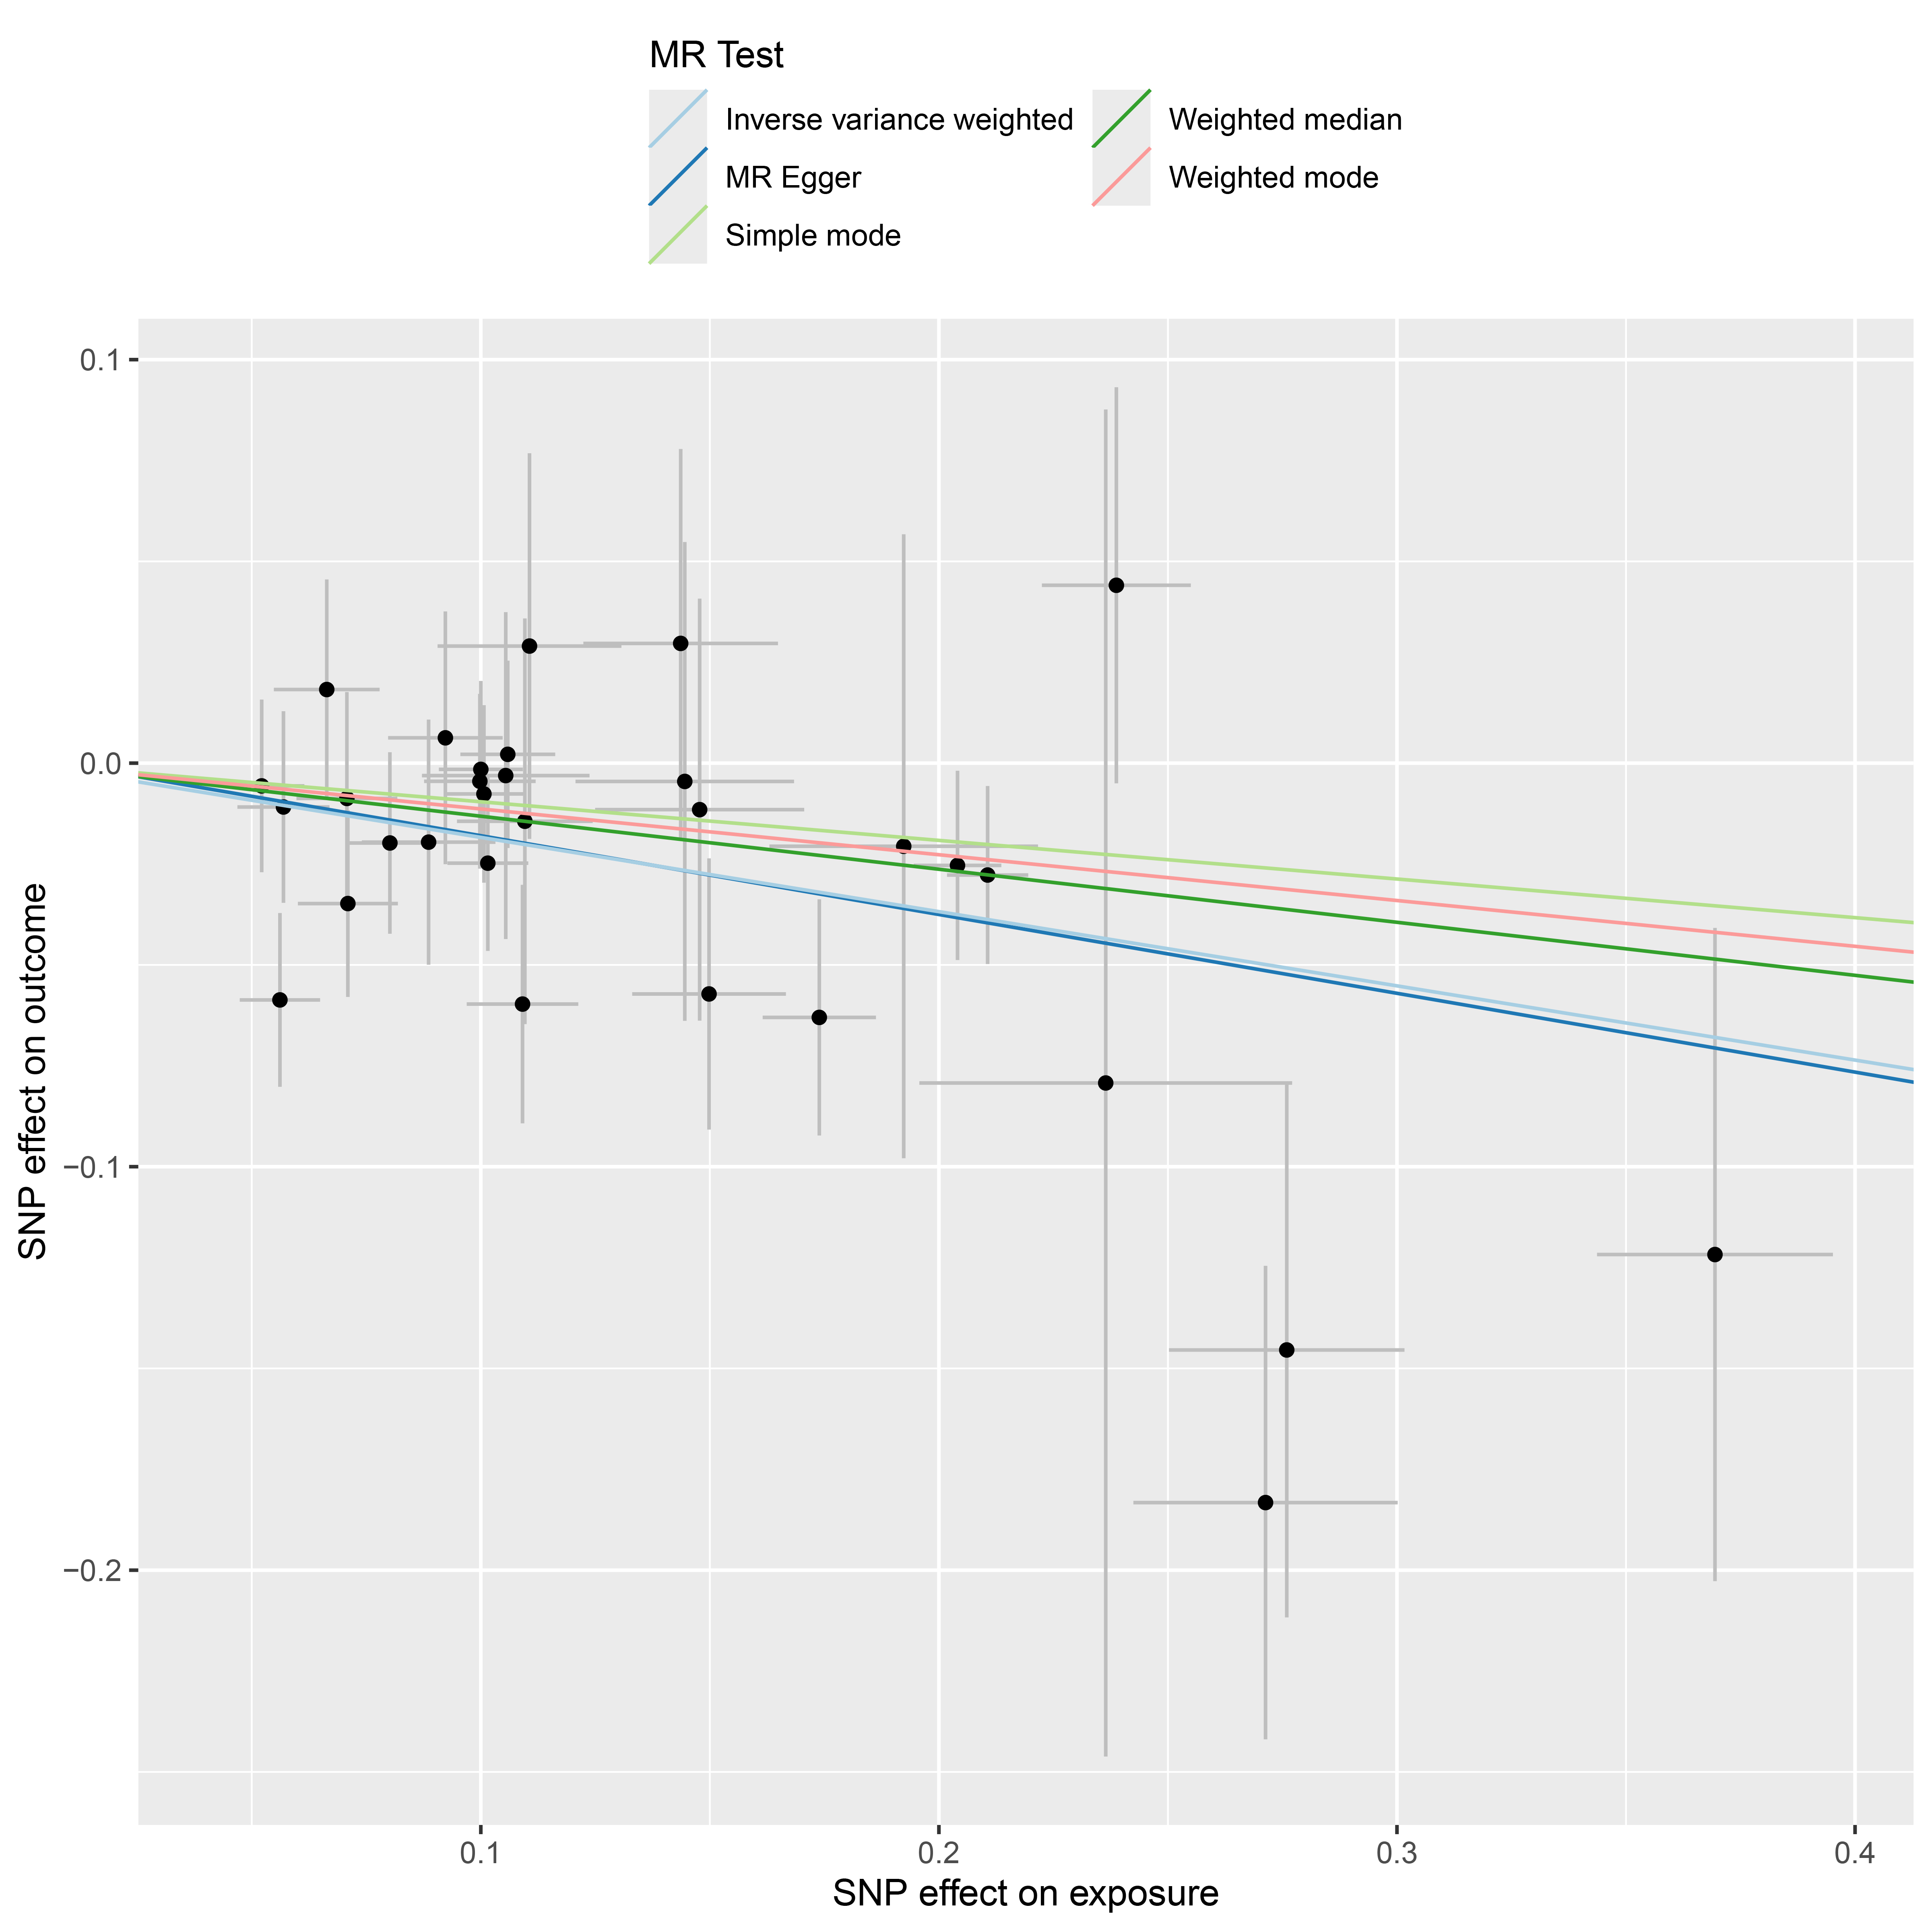


S2(c)


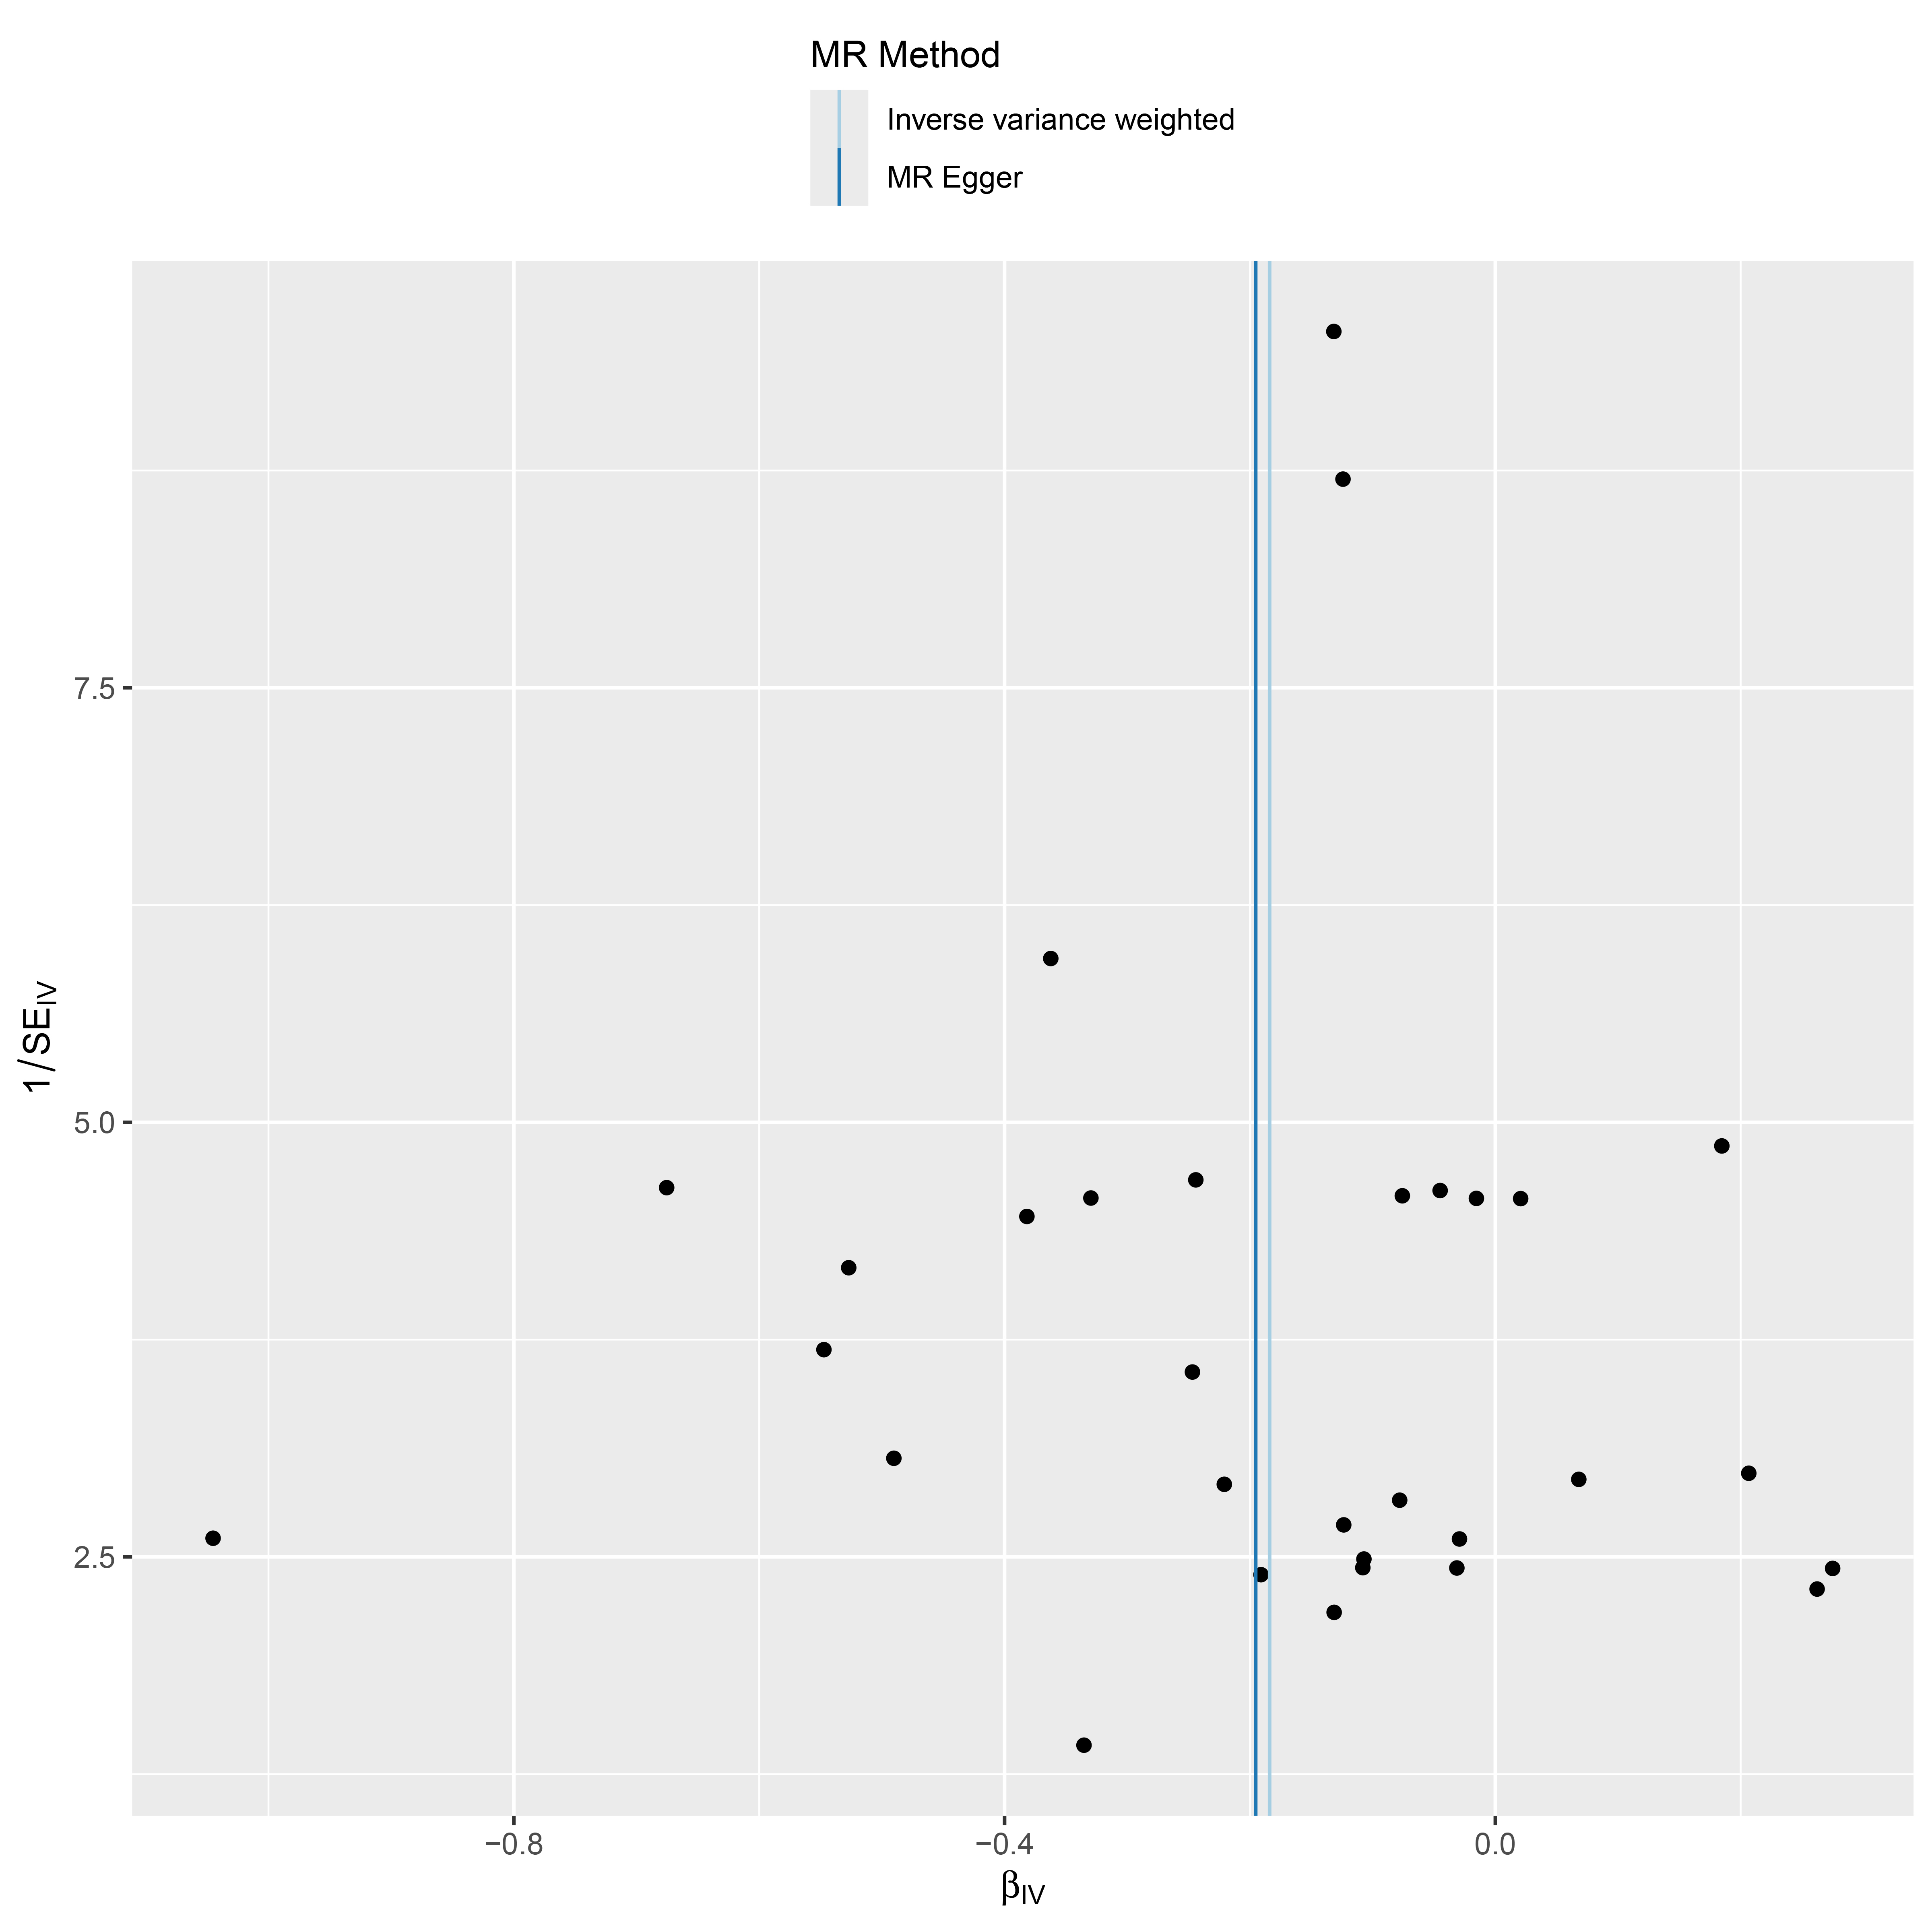


S2(d)


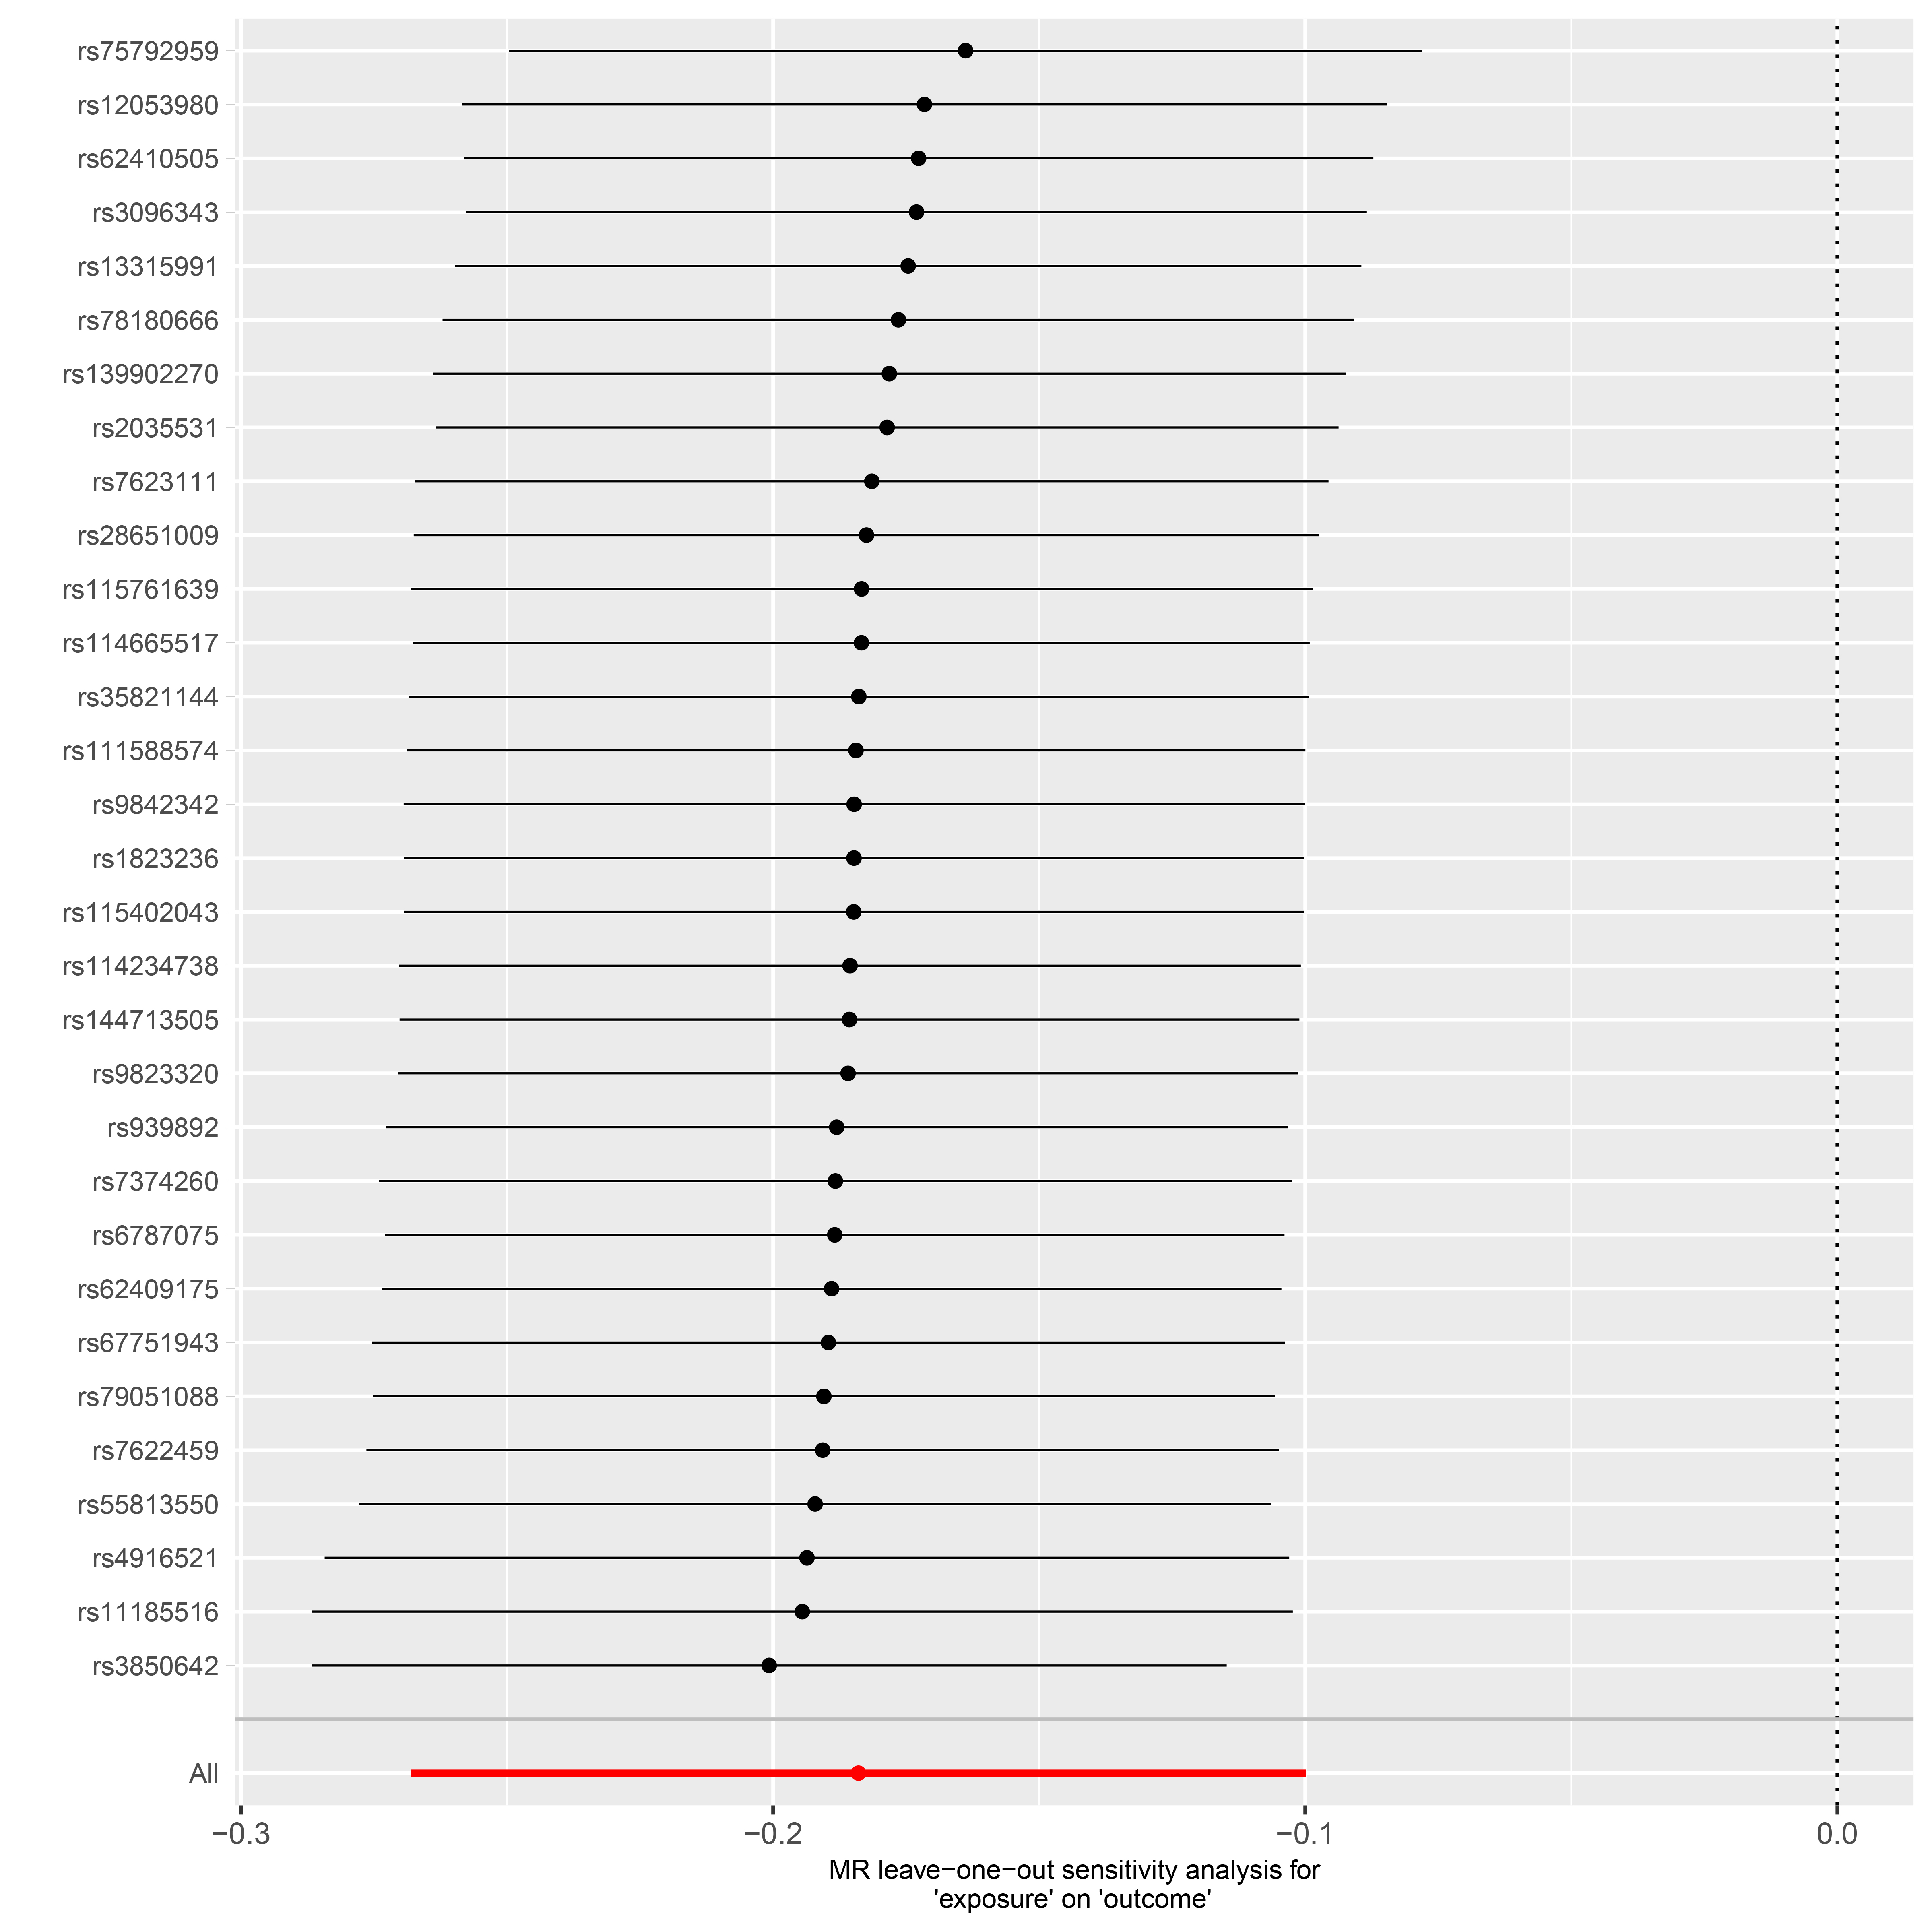


Supplementary Figure S2. Forest plot (a), scatter plot (b), funnel plot (c) and sensitivity analysis (d) of SNPs associated with ZDHHC19 on Acne vulgaris.

S3(a)


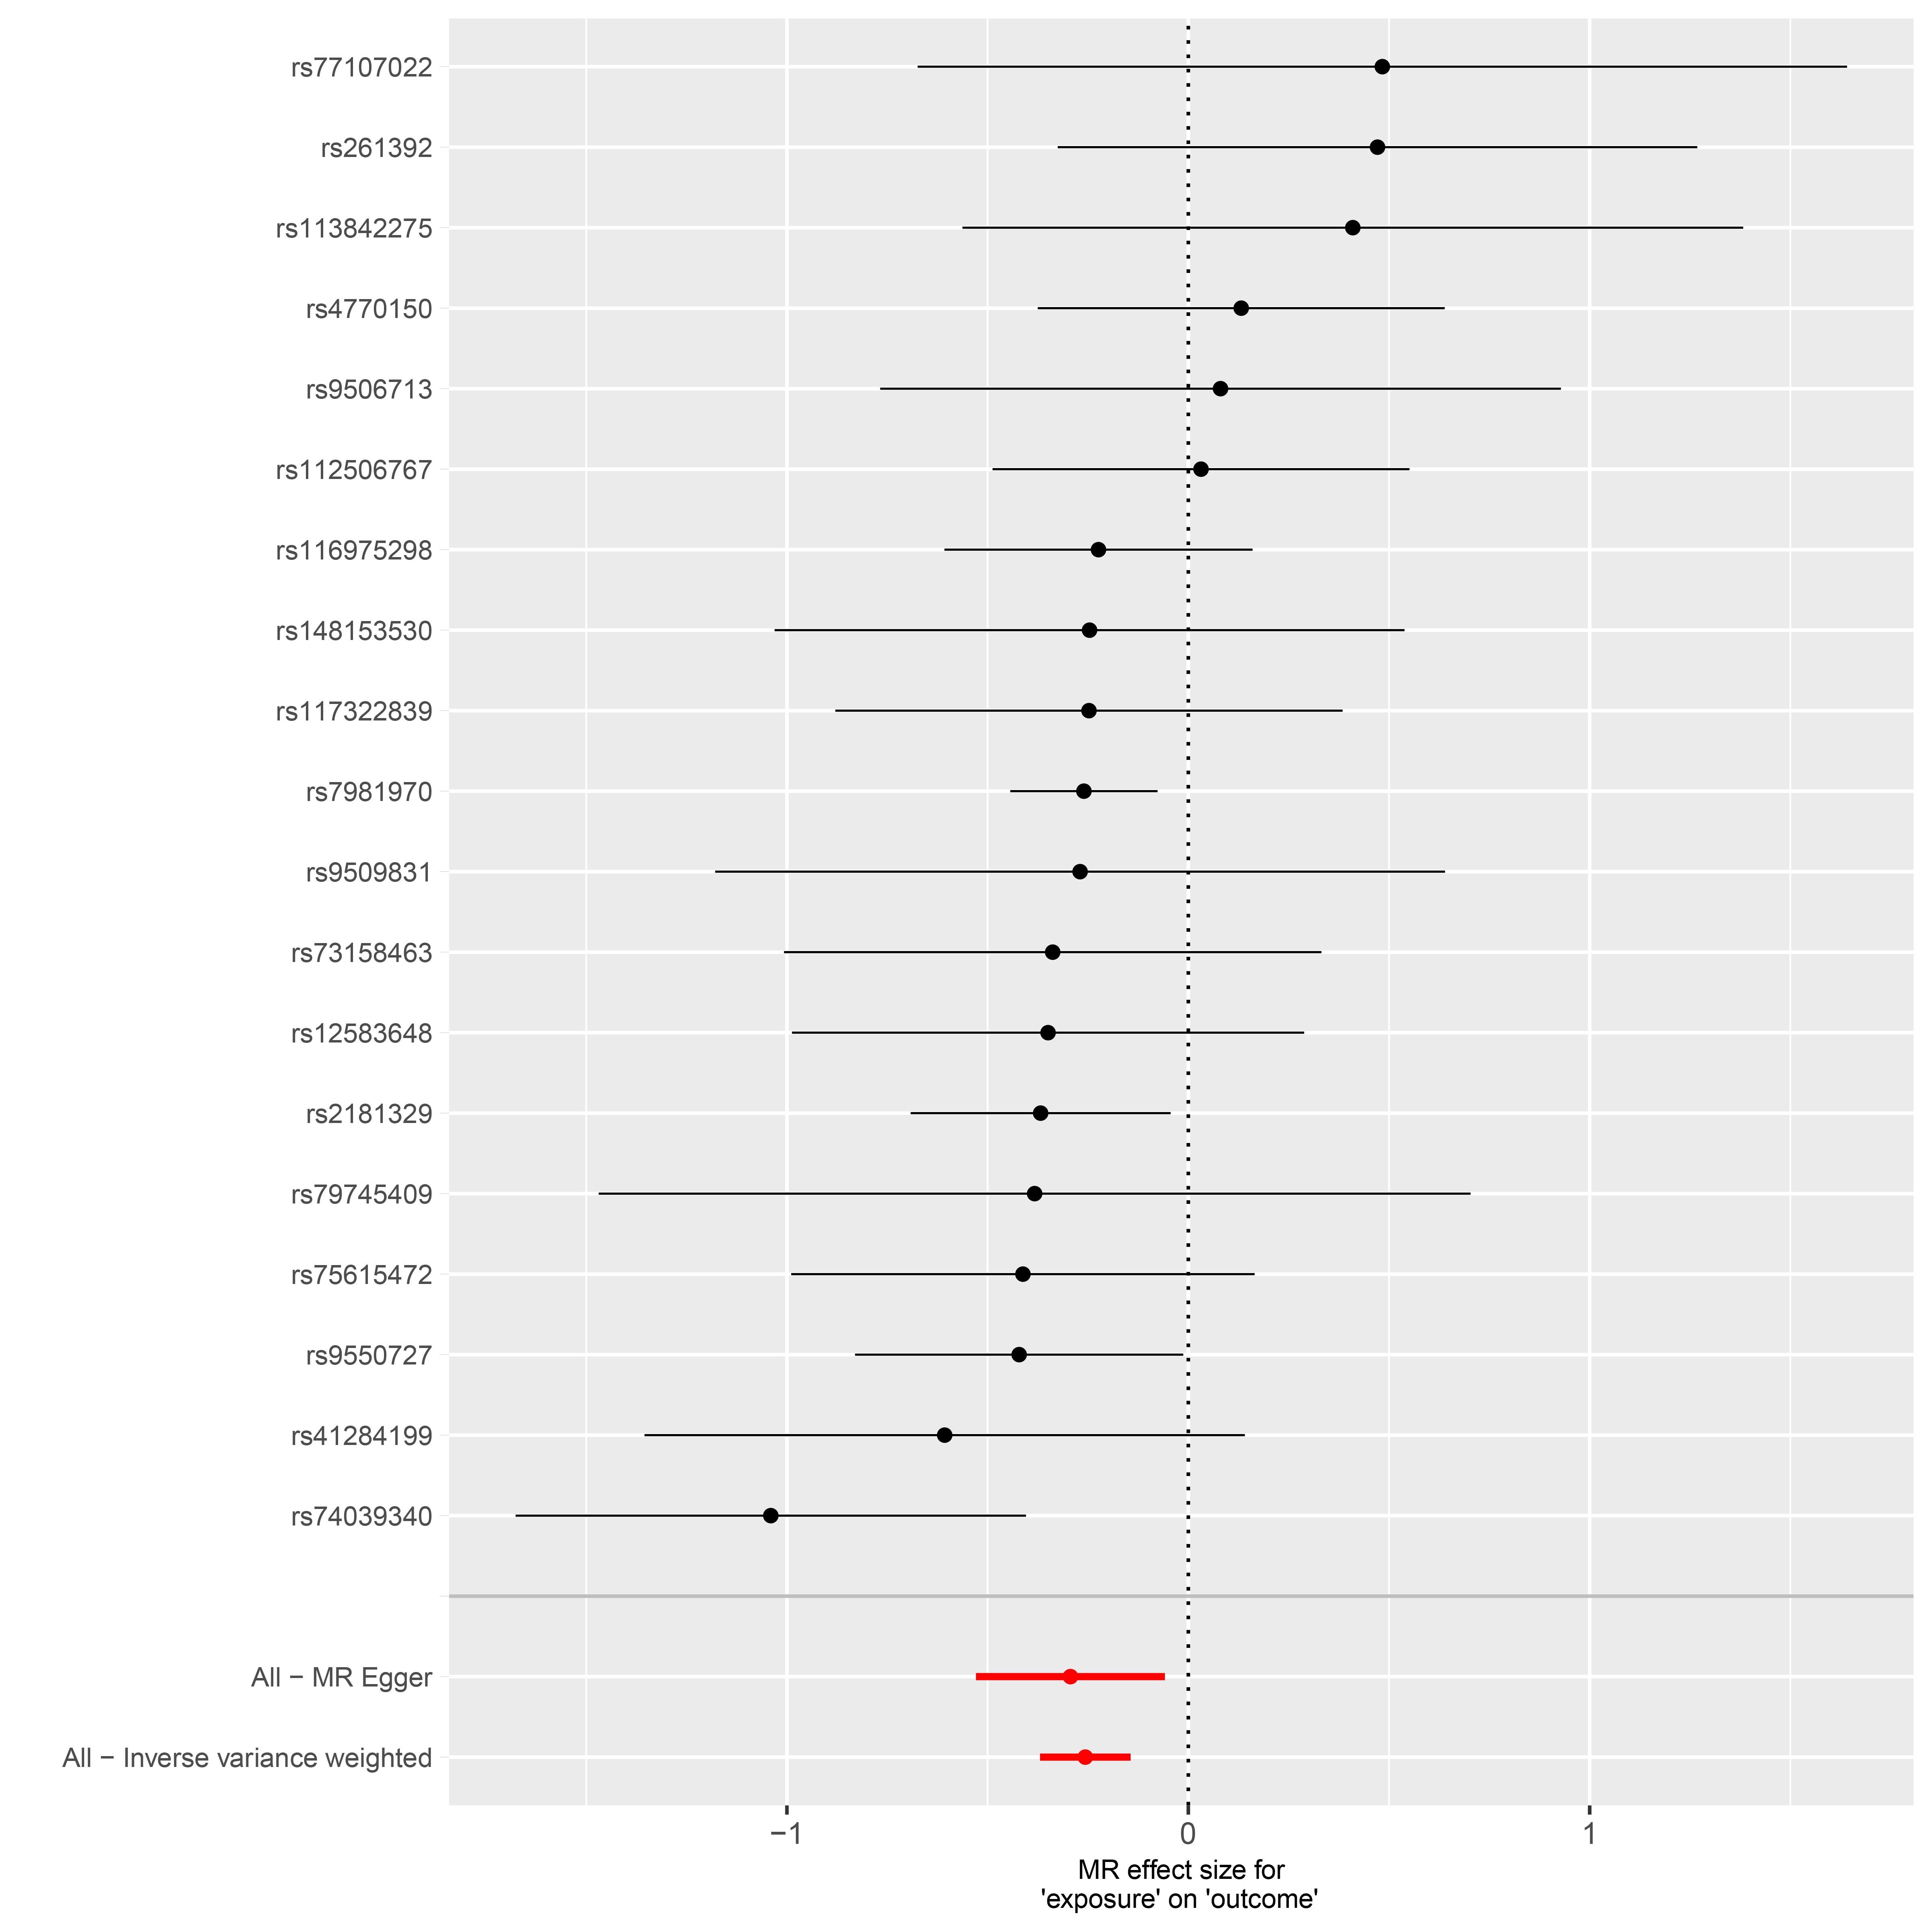


S3(b)


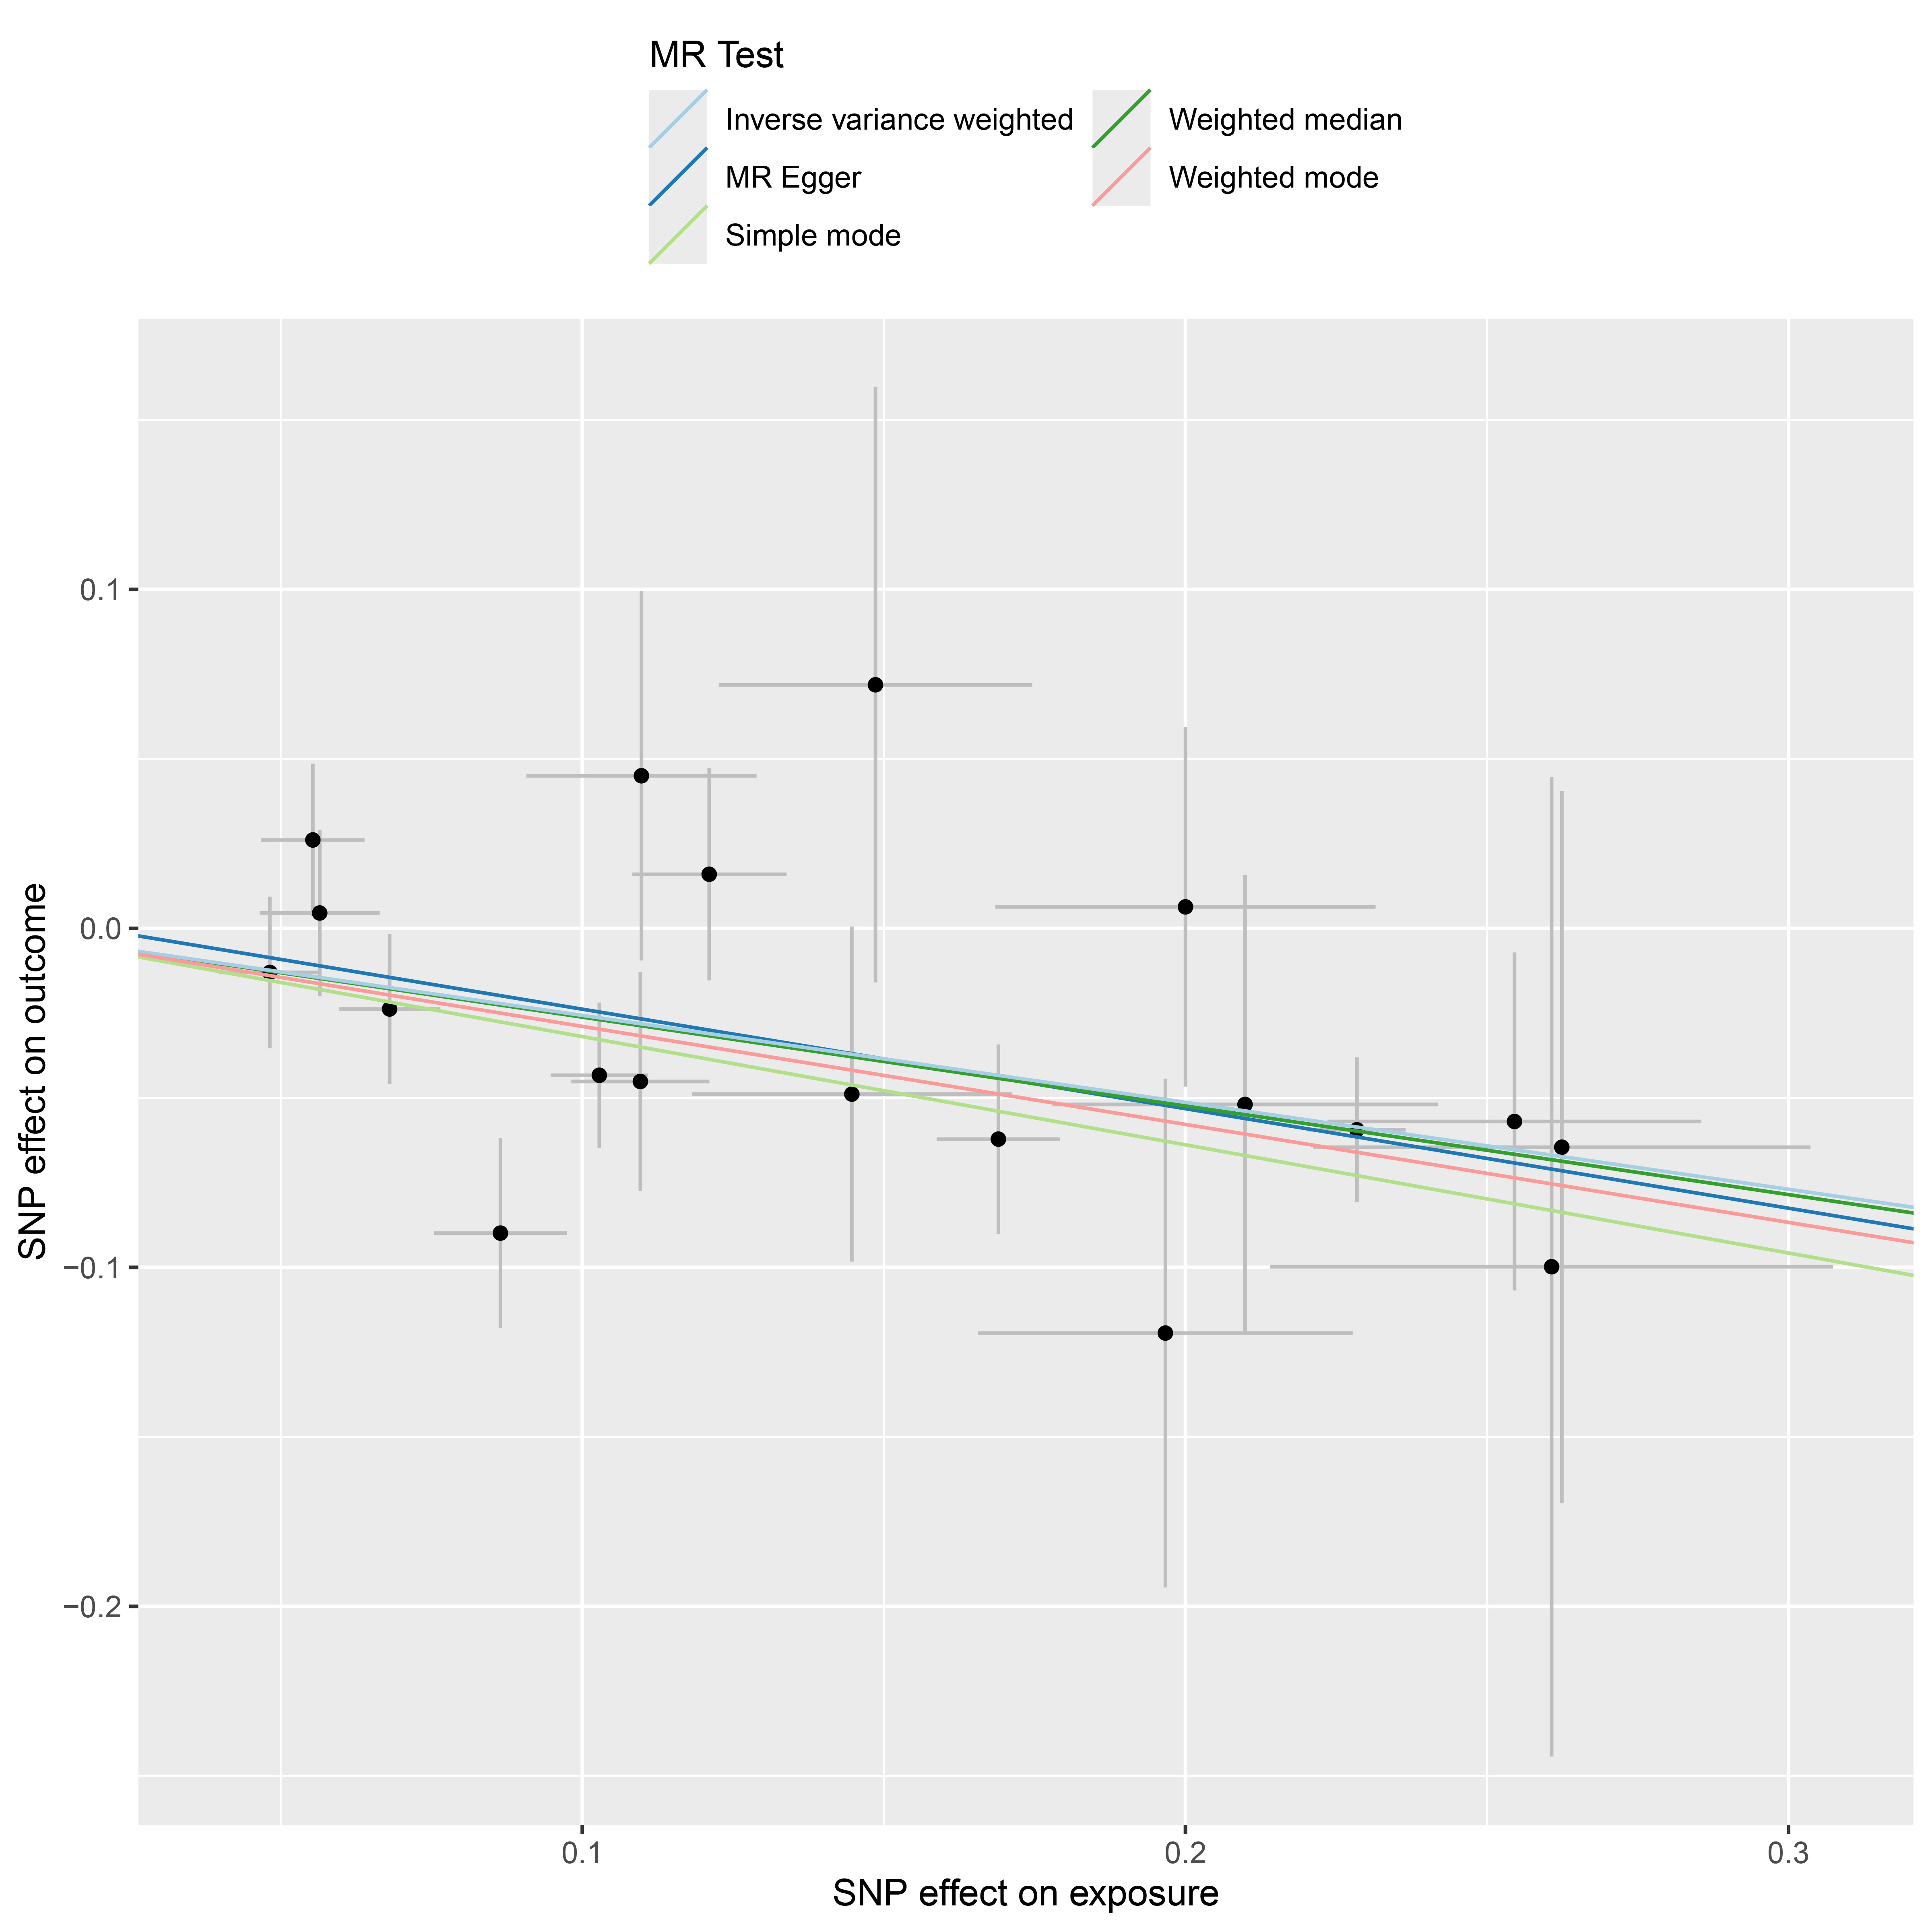


S3(c)


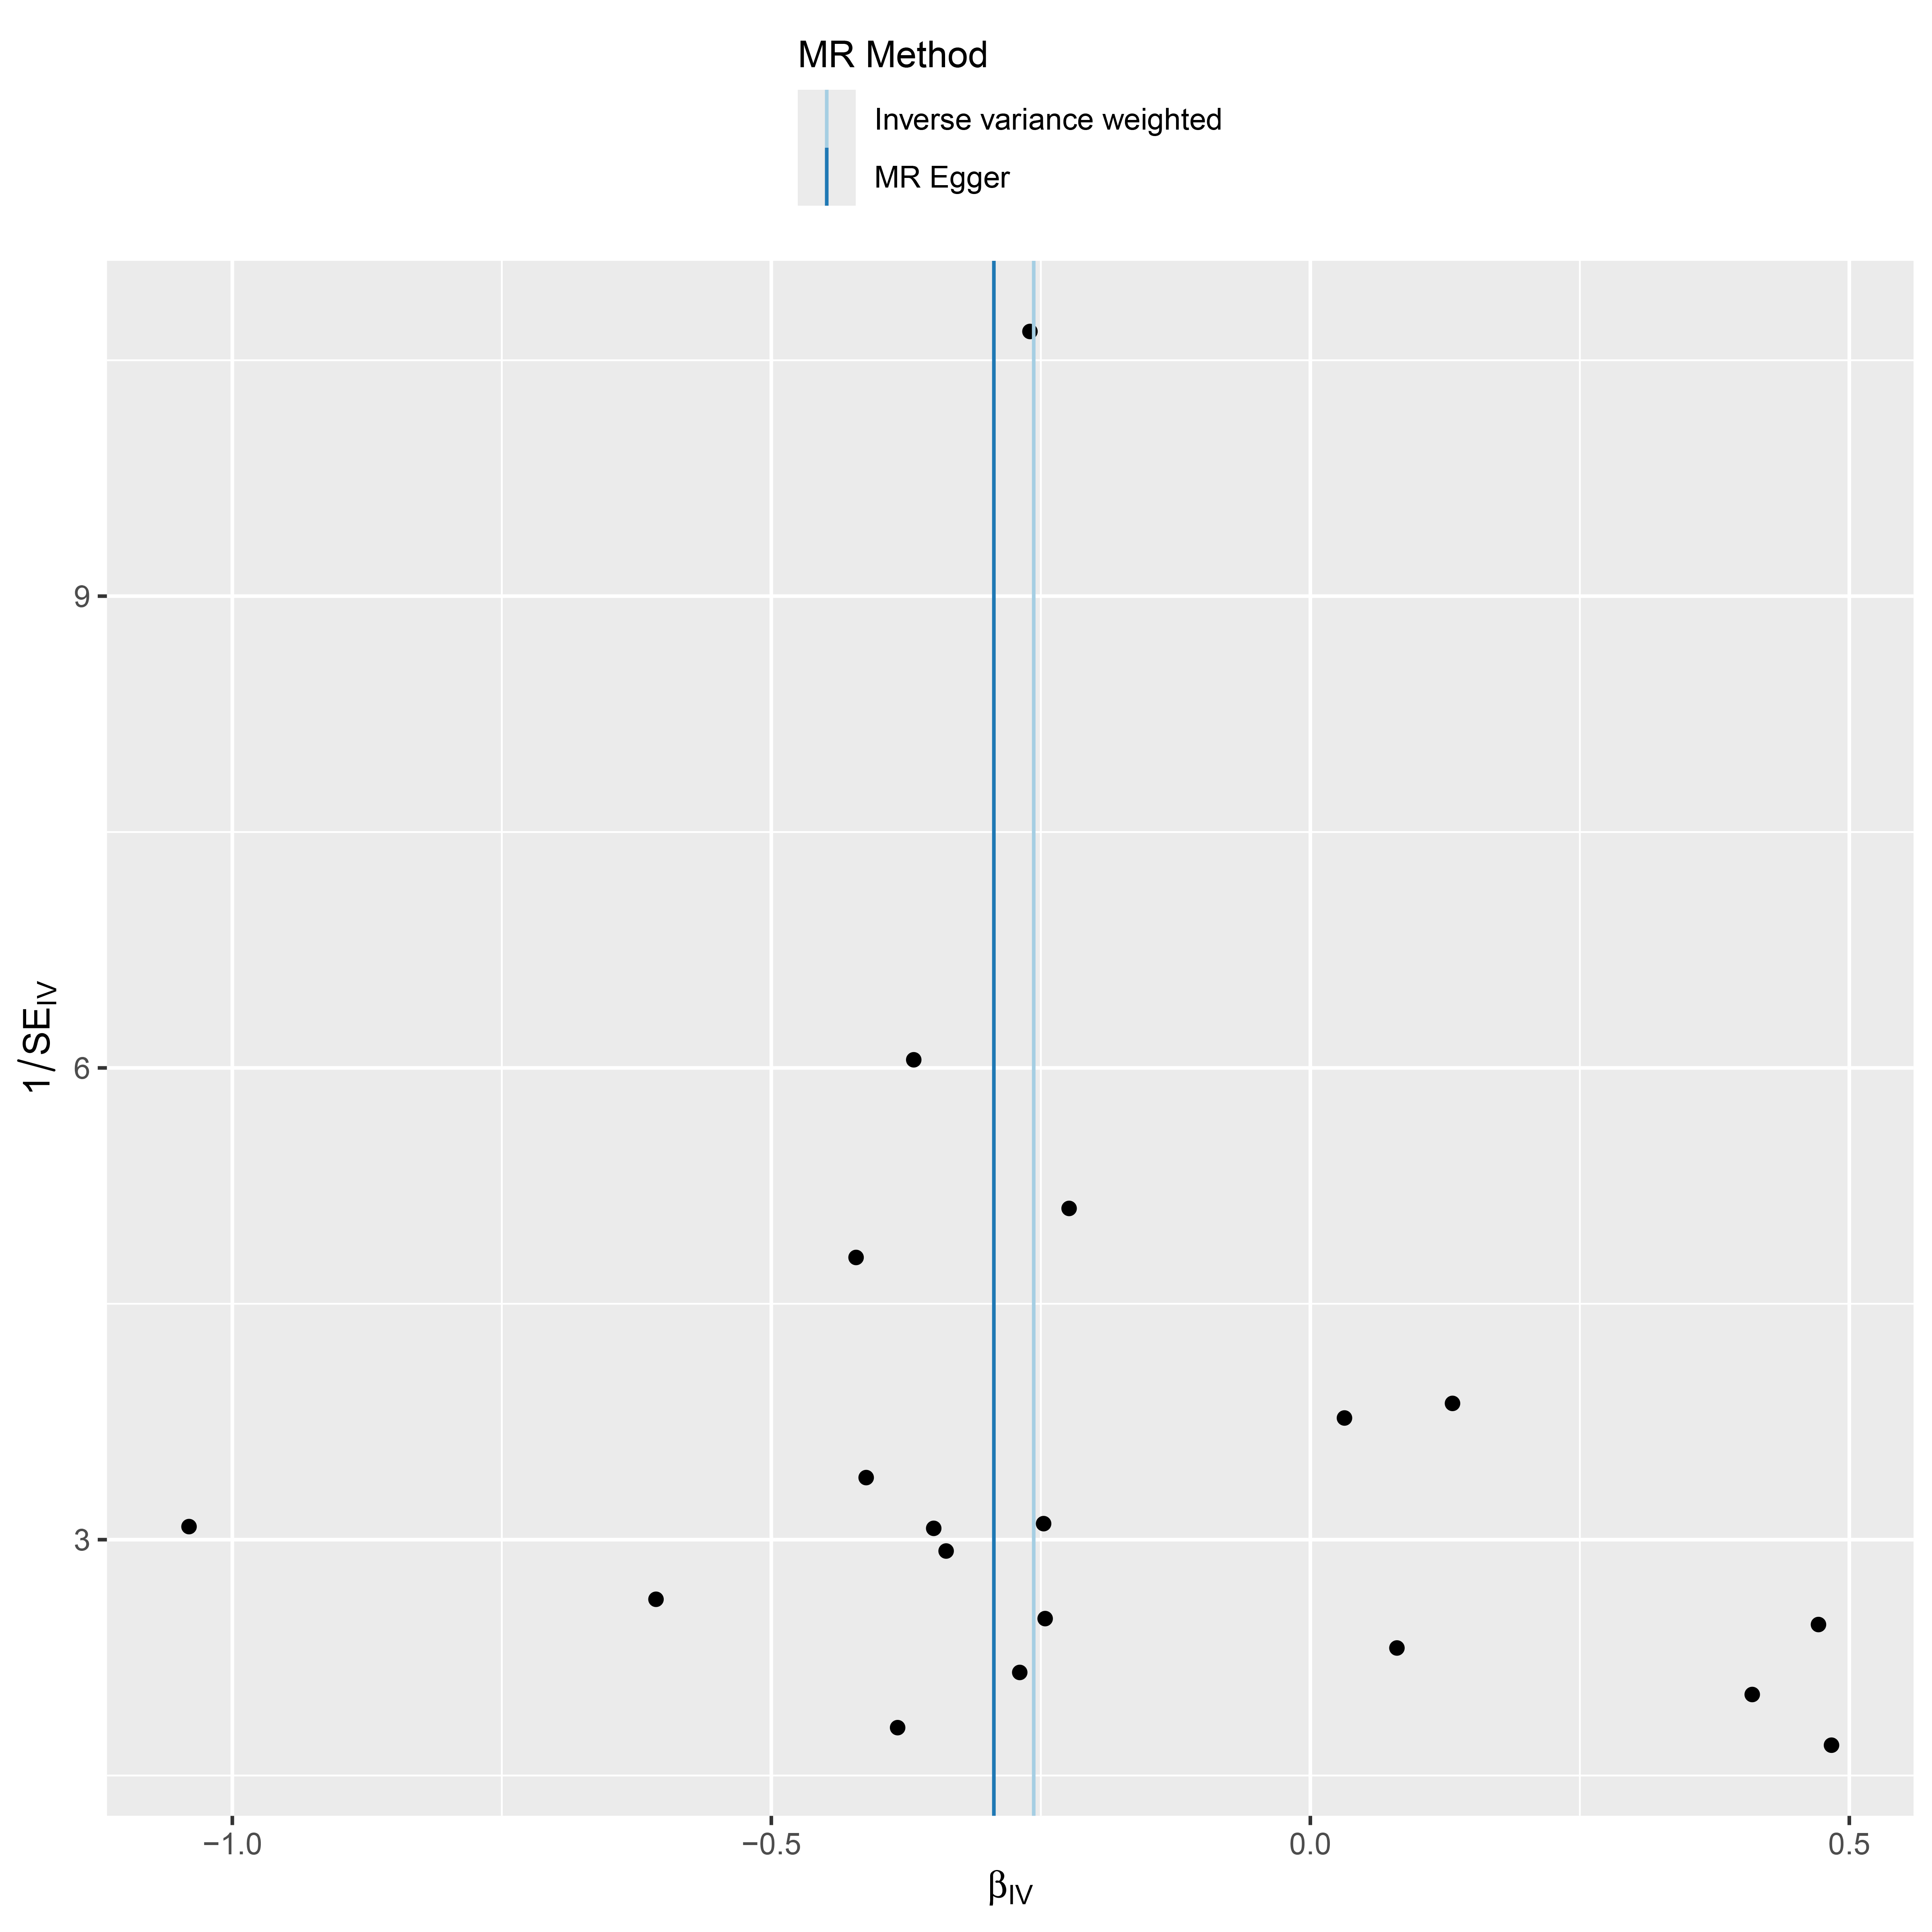


S3(d)


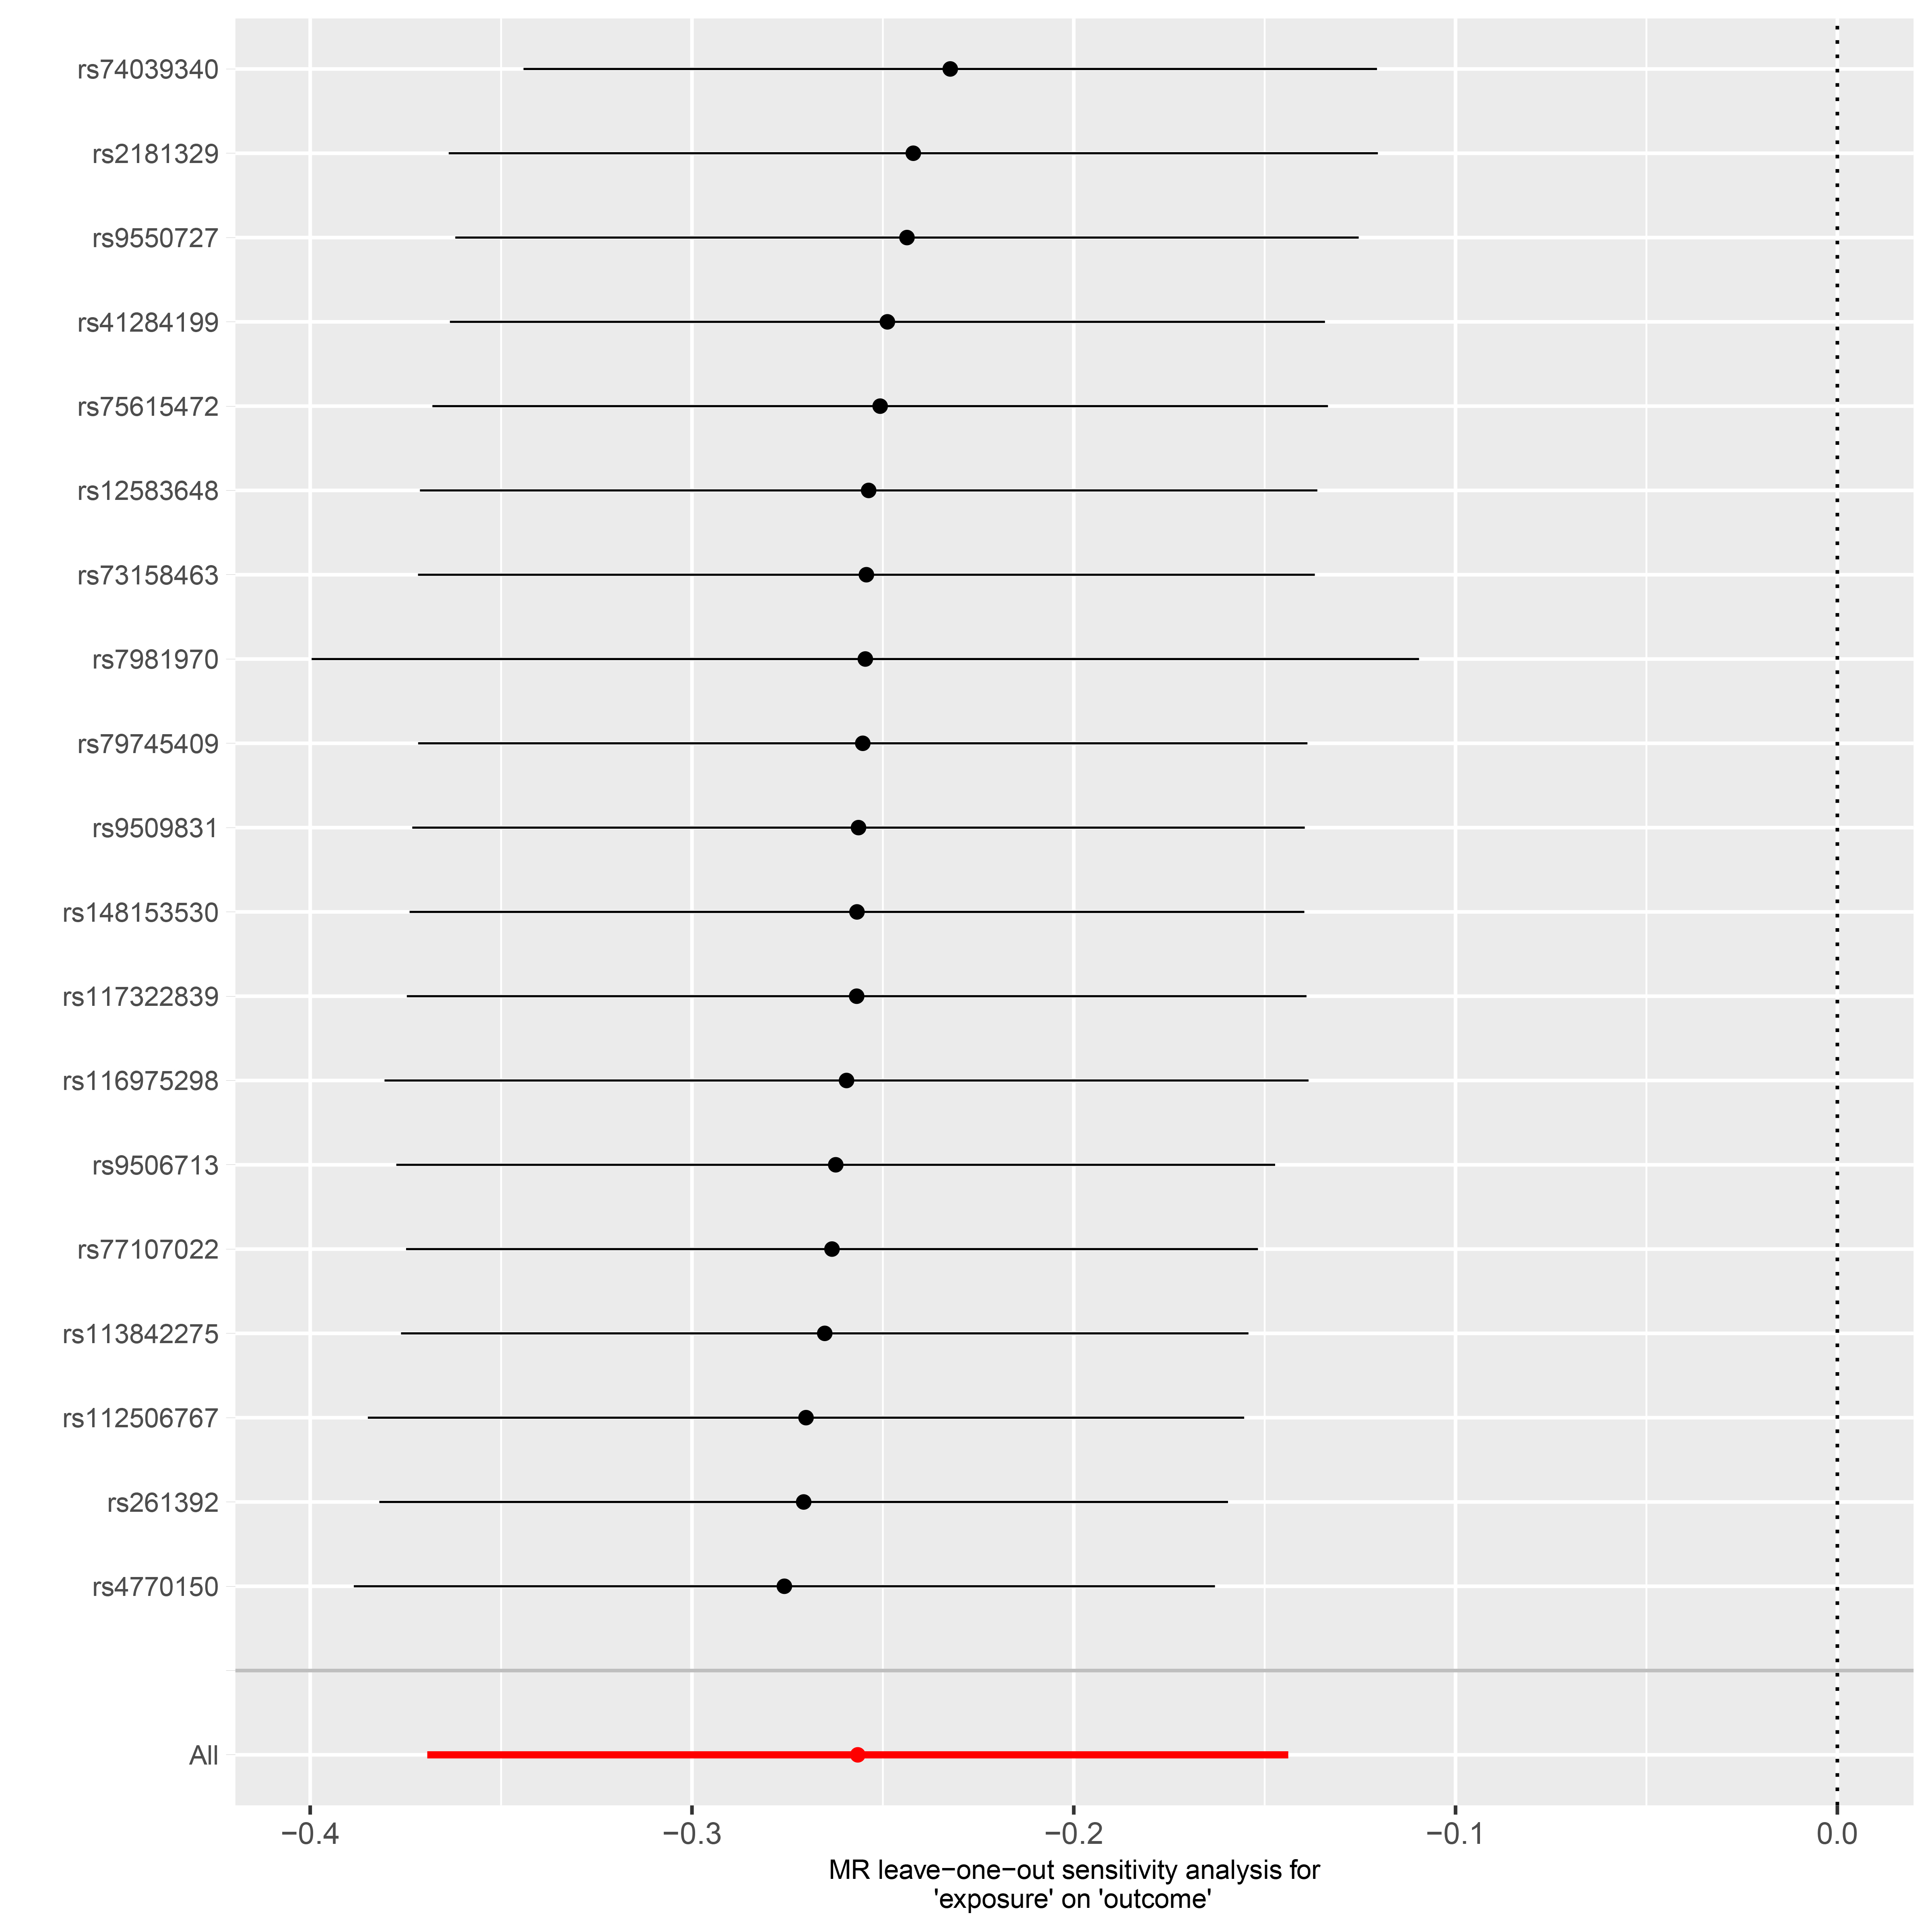


Supplementary Figure S3. Forest plot (a), scatter plot (b), funnel plot (c) and sensitivity analysis (d) of SNPs associated with ZDHHC20 on Acne vulgaris.

S4


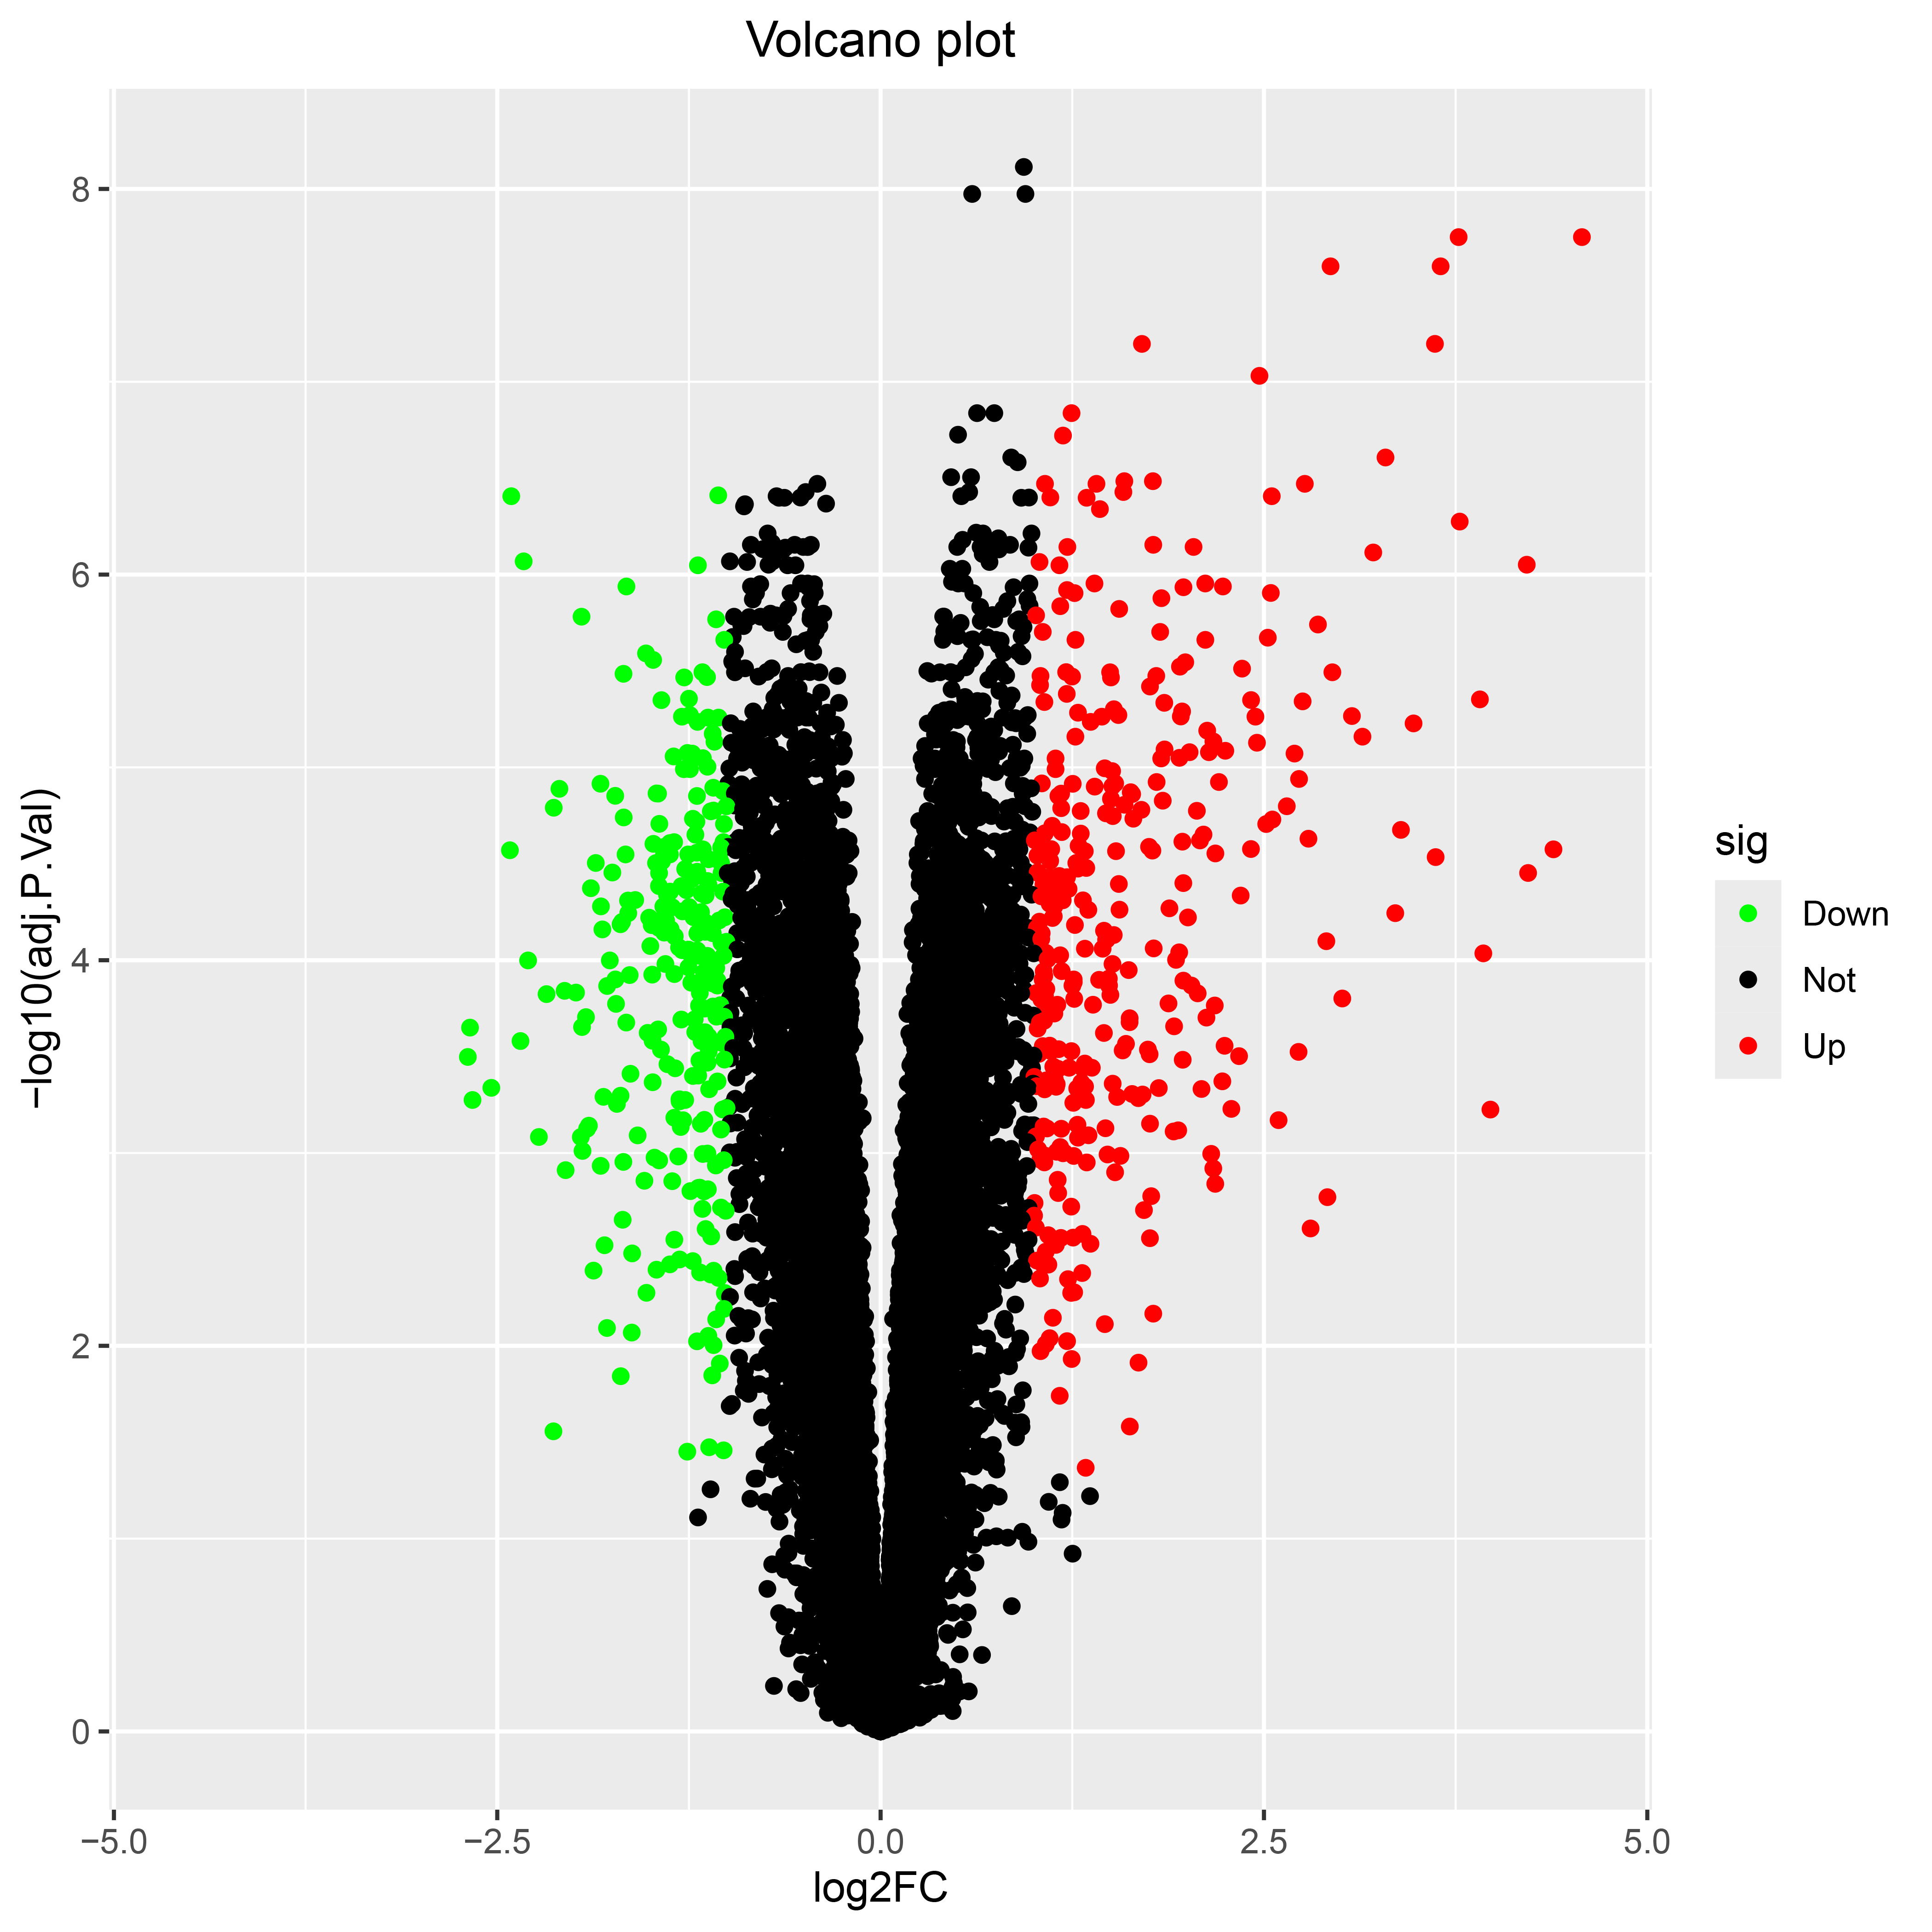


Supplementary Figure S4. Volcano plot of Differentially Expressed Genes (DEGs).

“sig” indicates significance (sig) classes of differential expression derived from limma.

S5


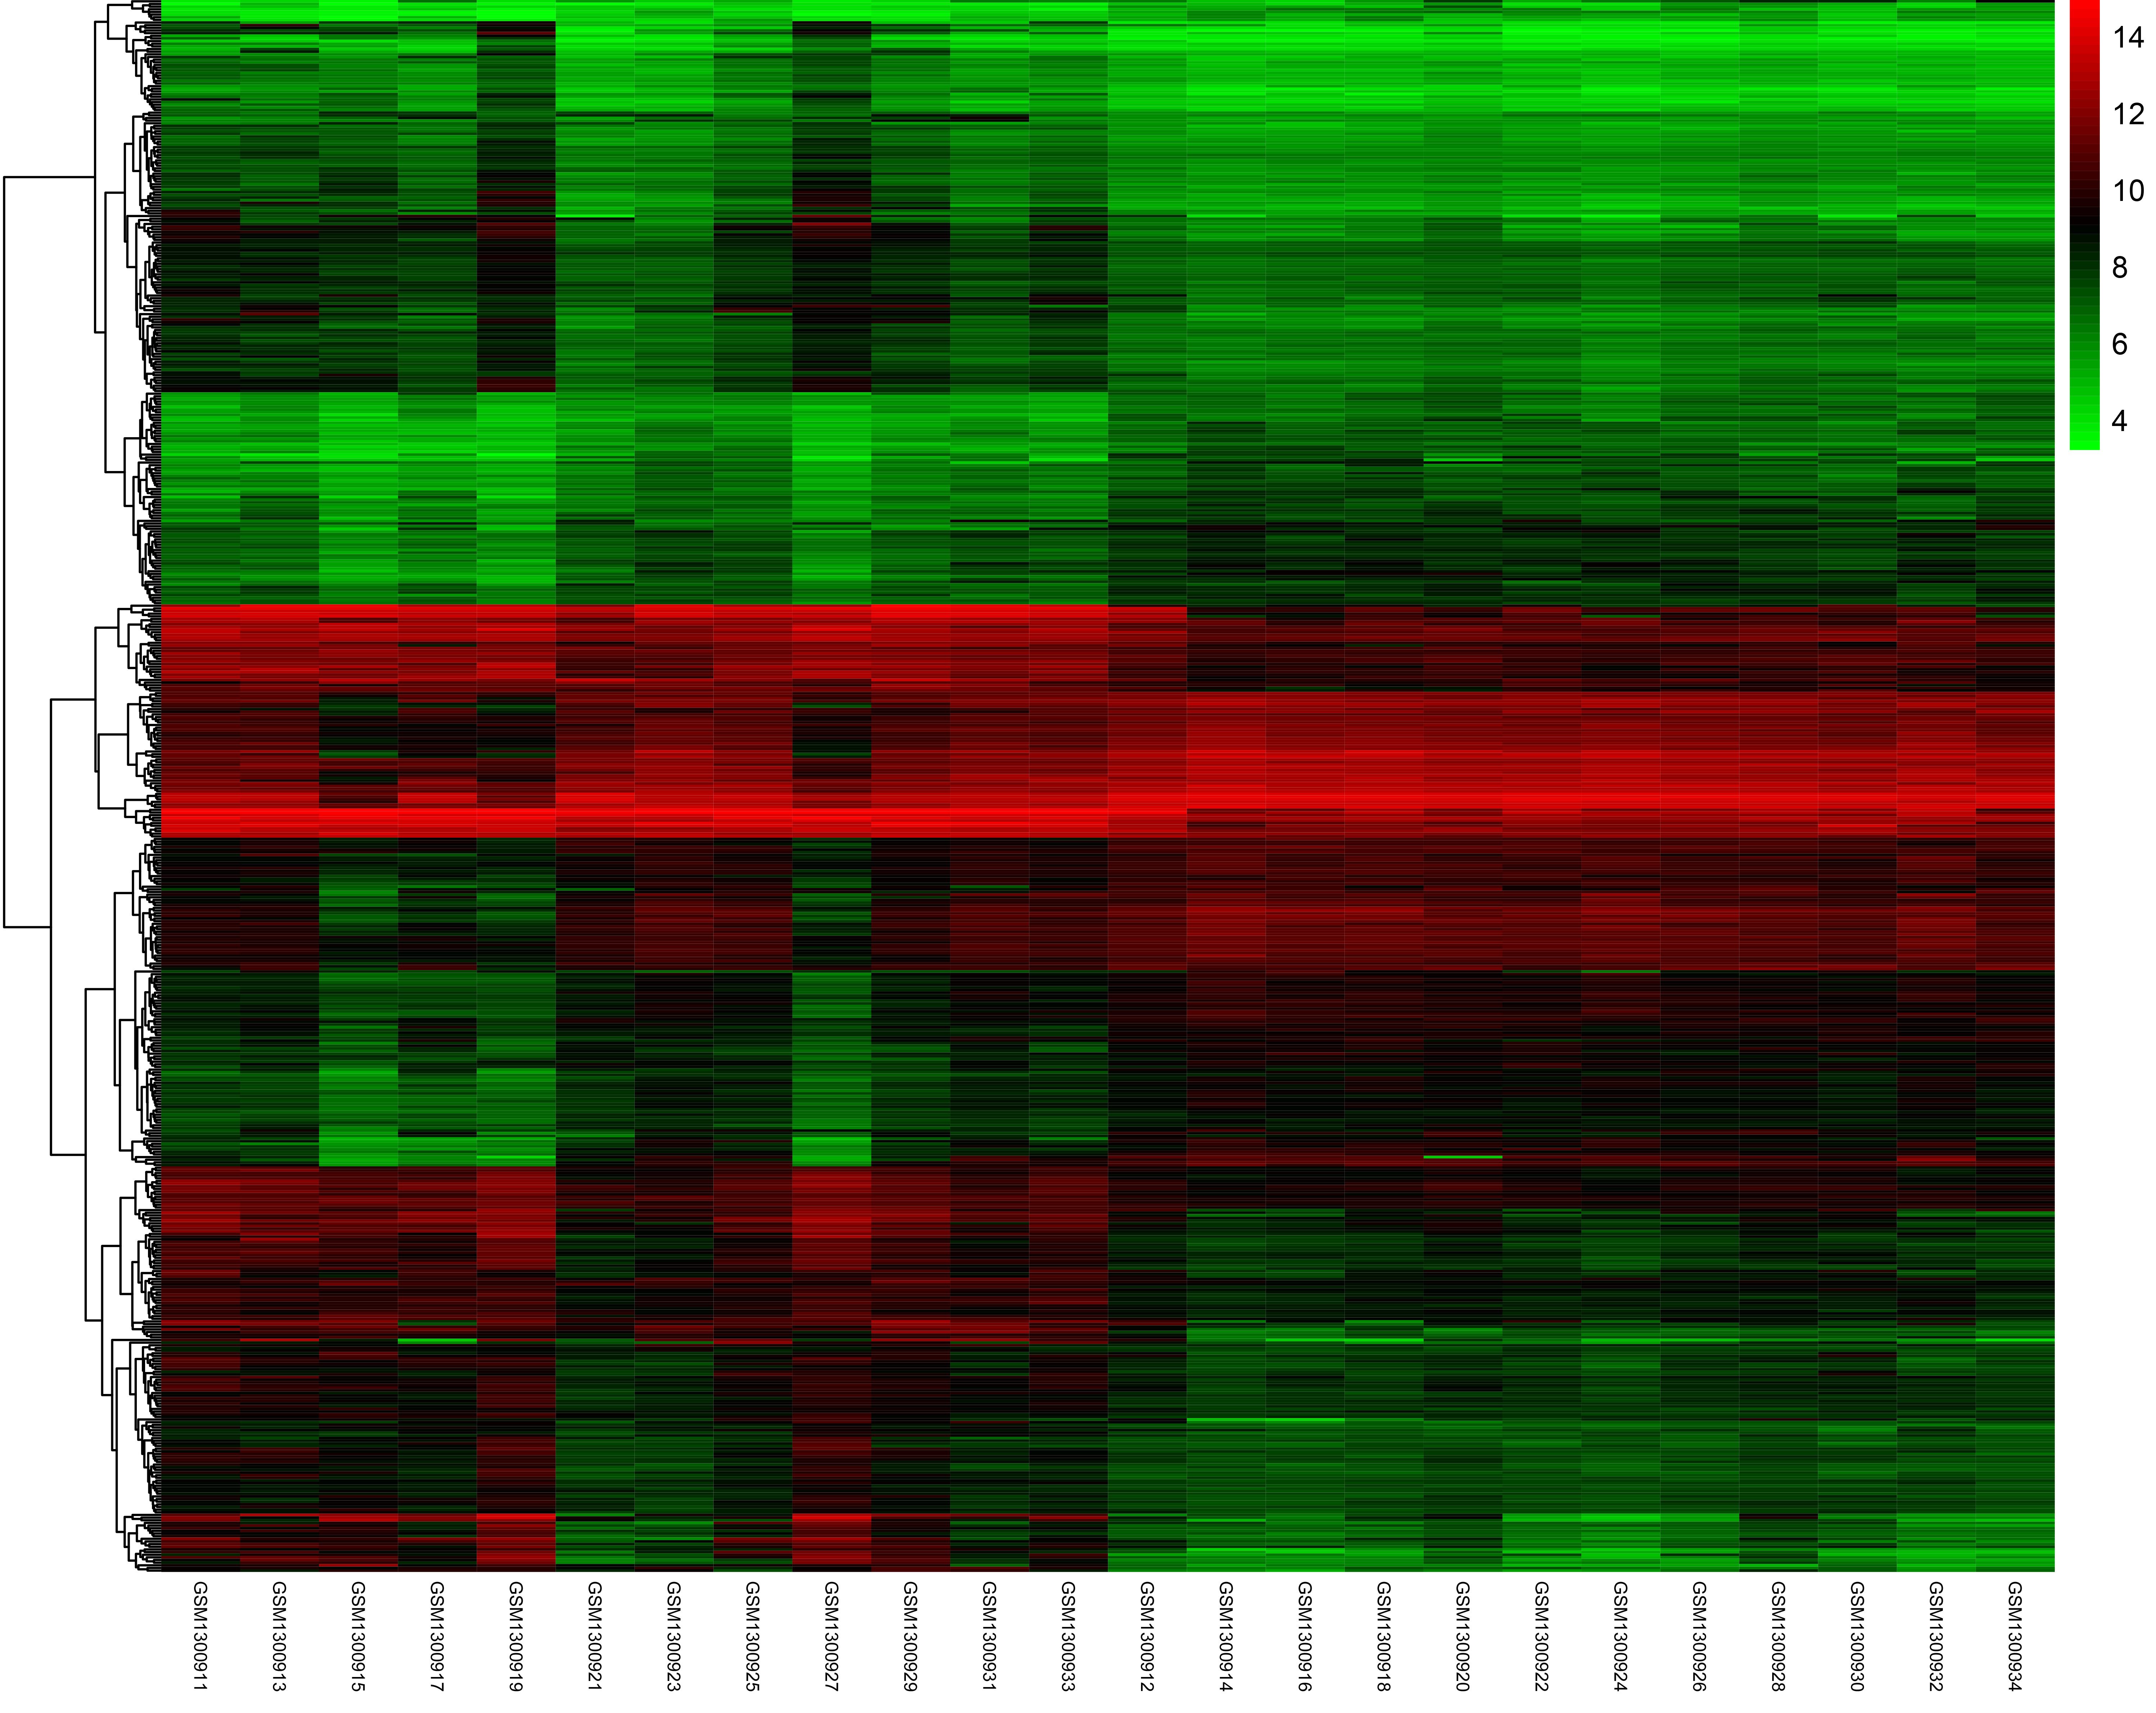


Supplementary Figure S5. Heatmap of top DEGs.

The color scale (green–black–red) represents relative gene expression values ranging from low (green) to high (red).

S6(a)


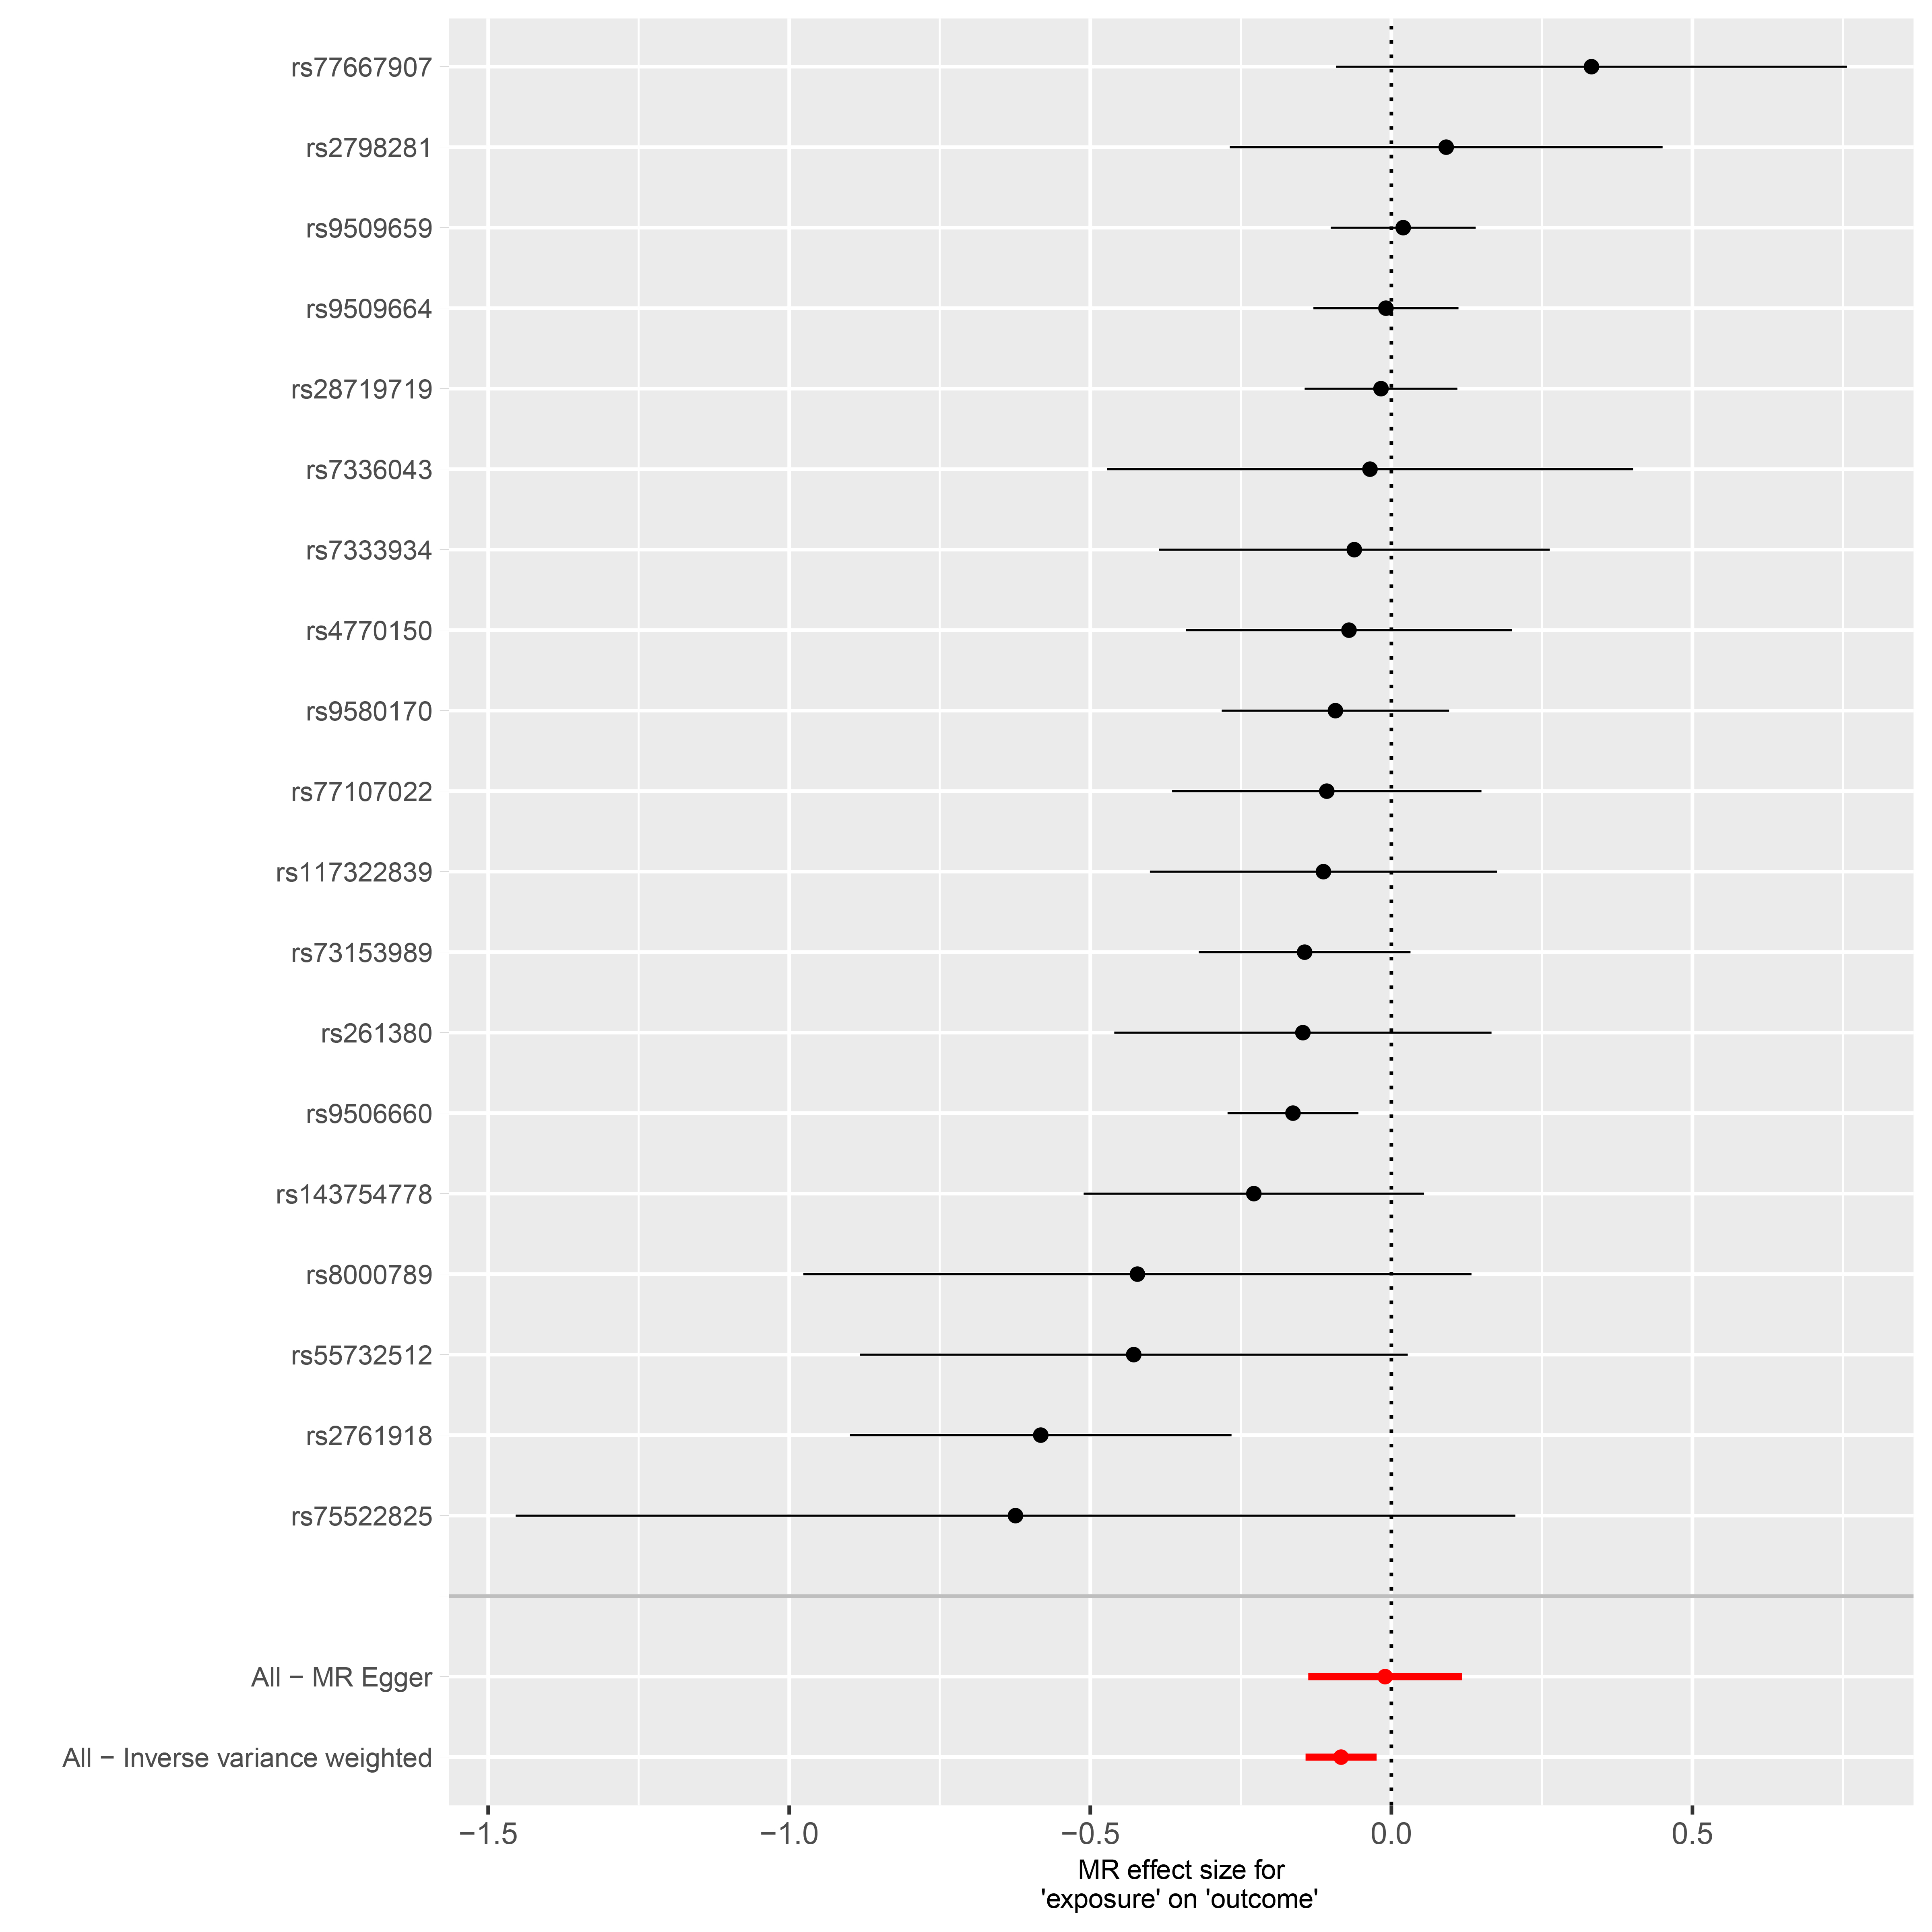


S6(b)


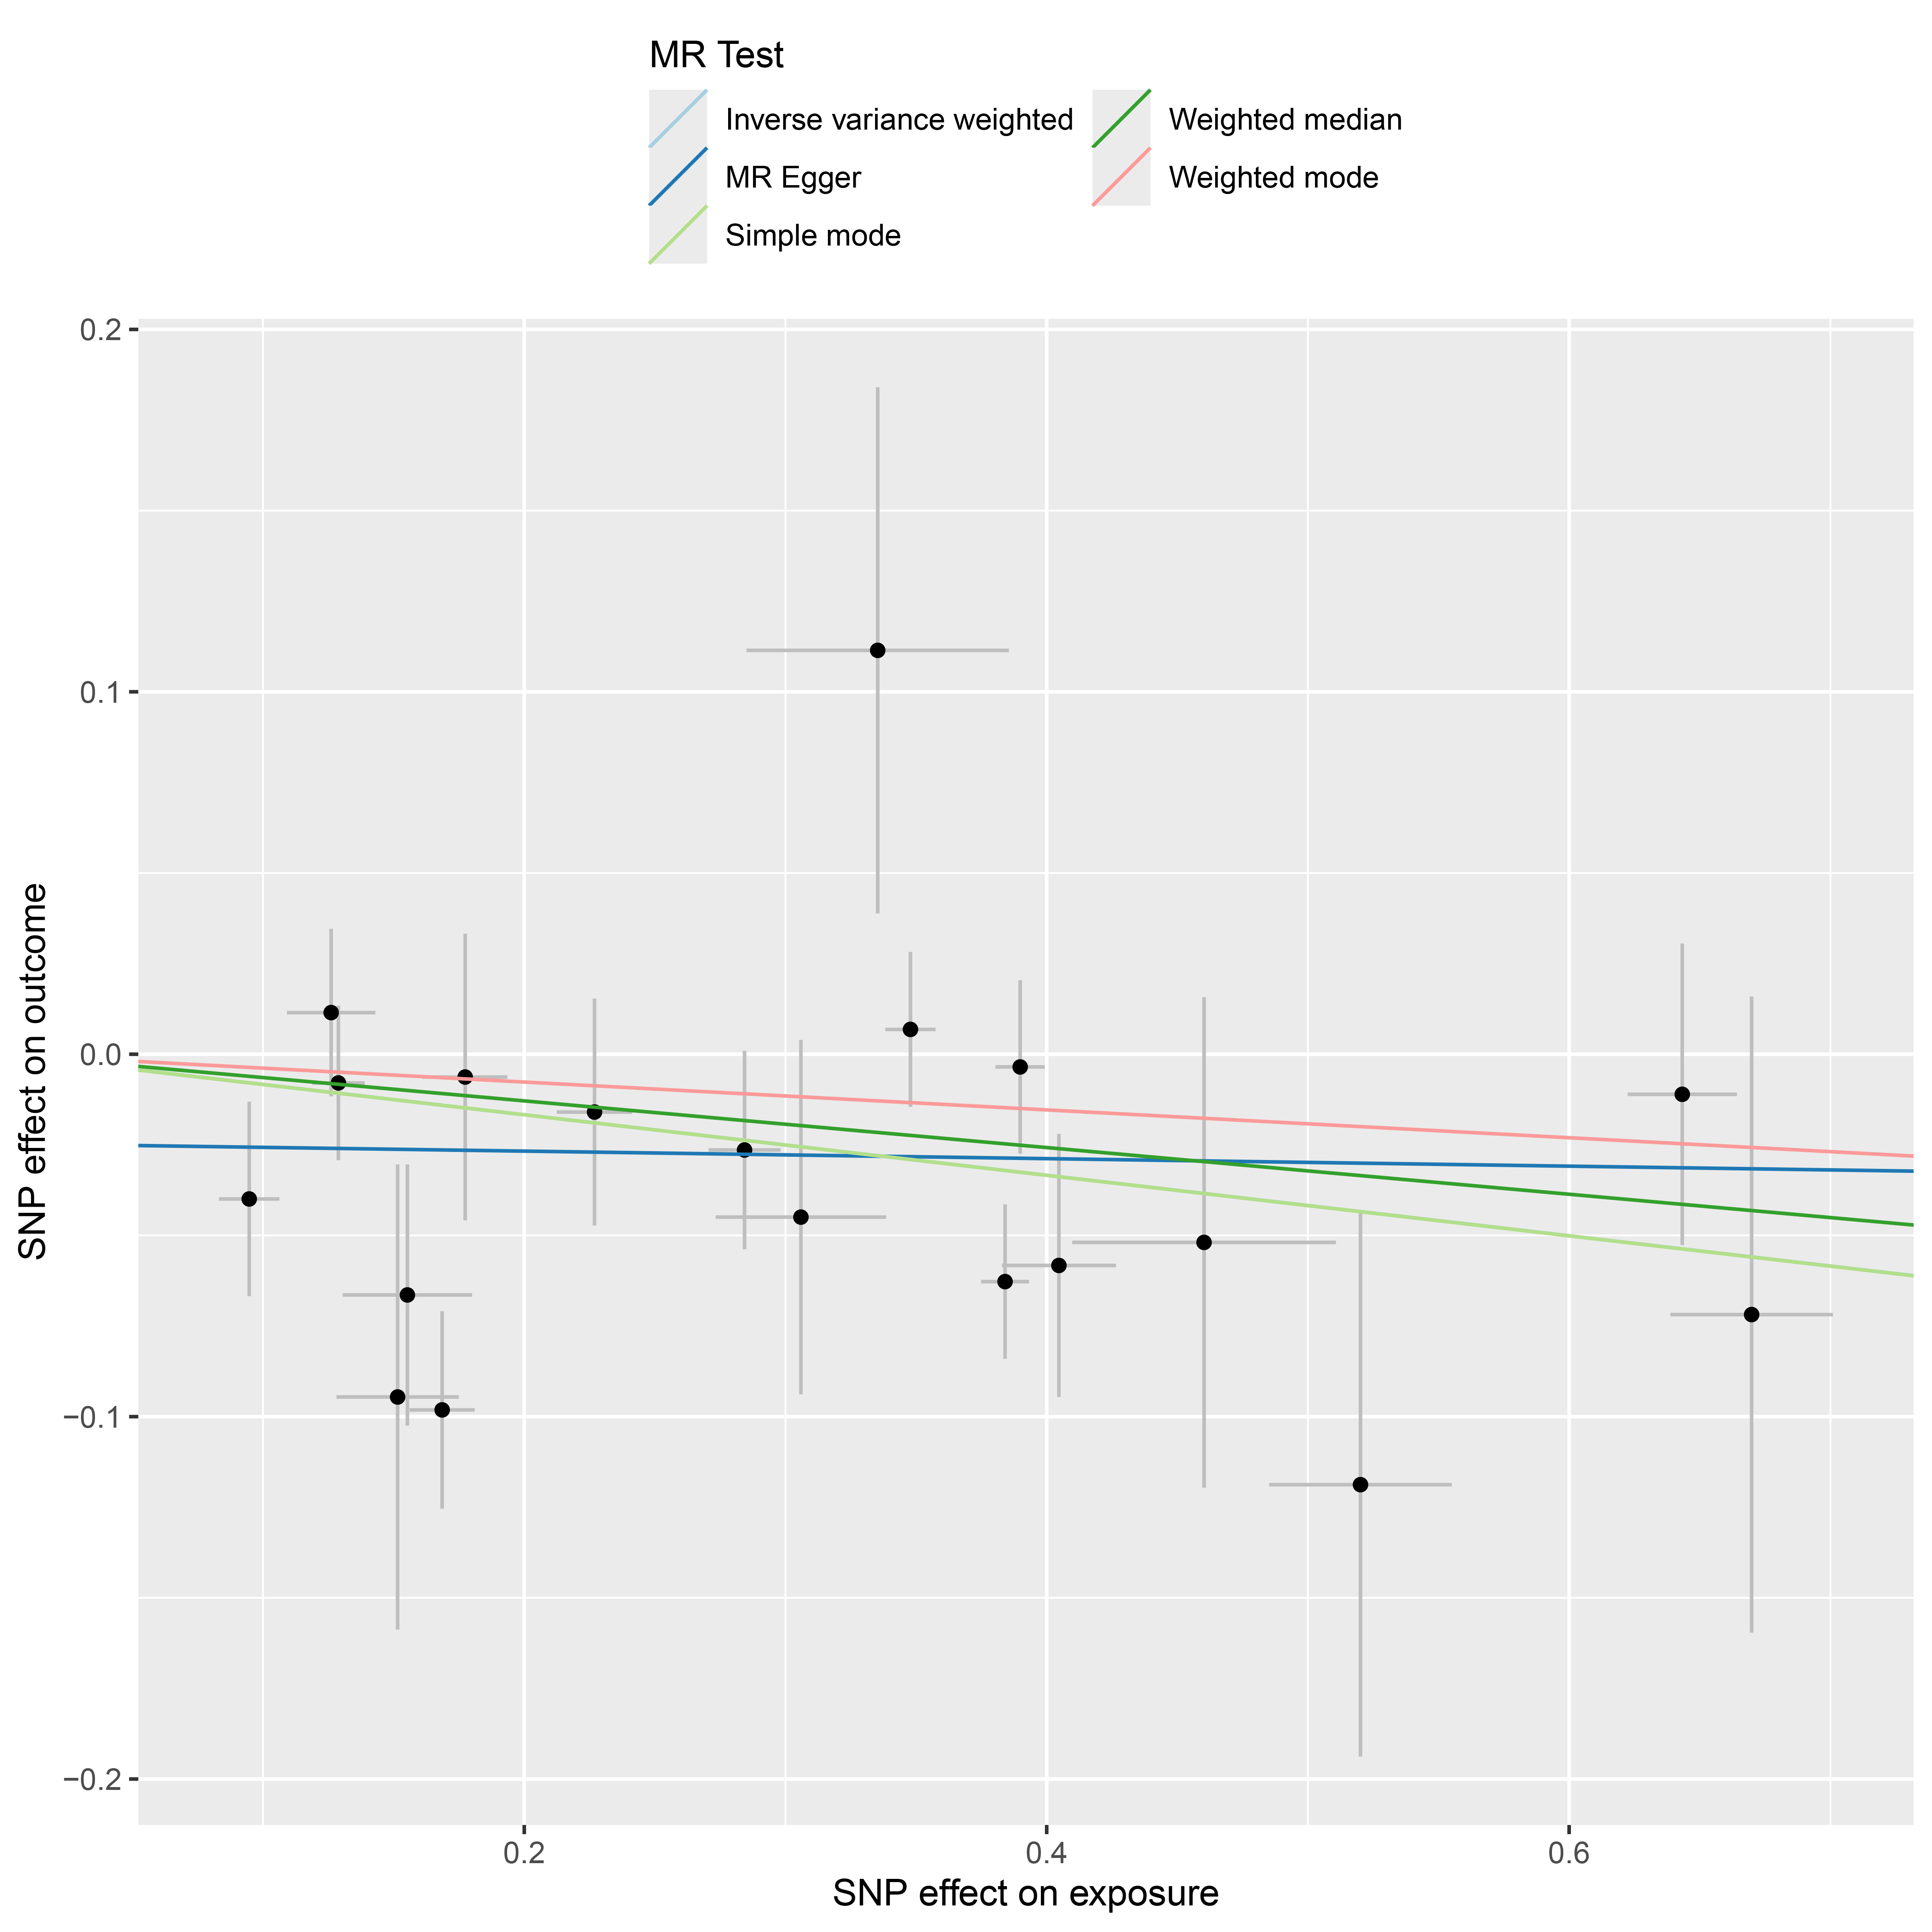


S6(c)


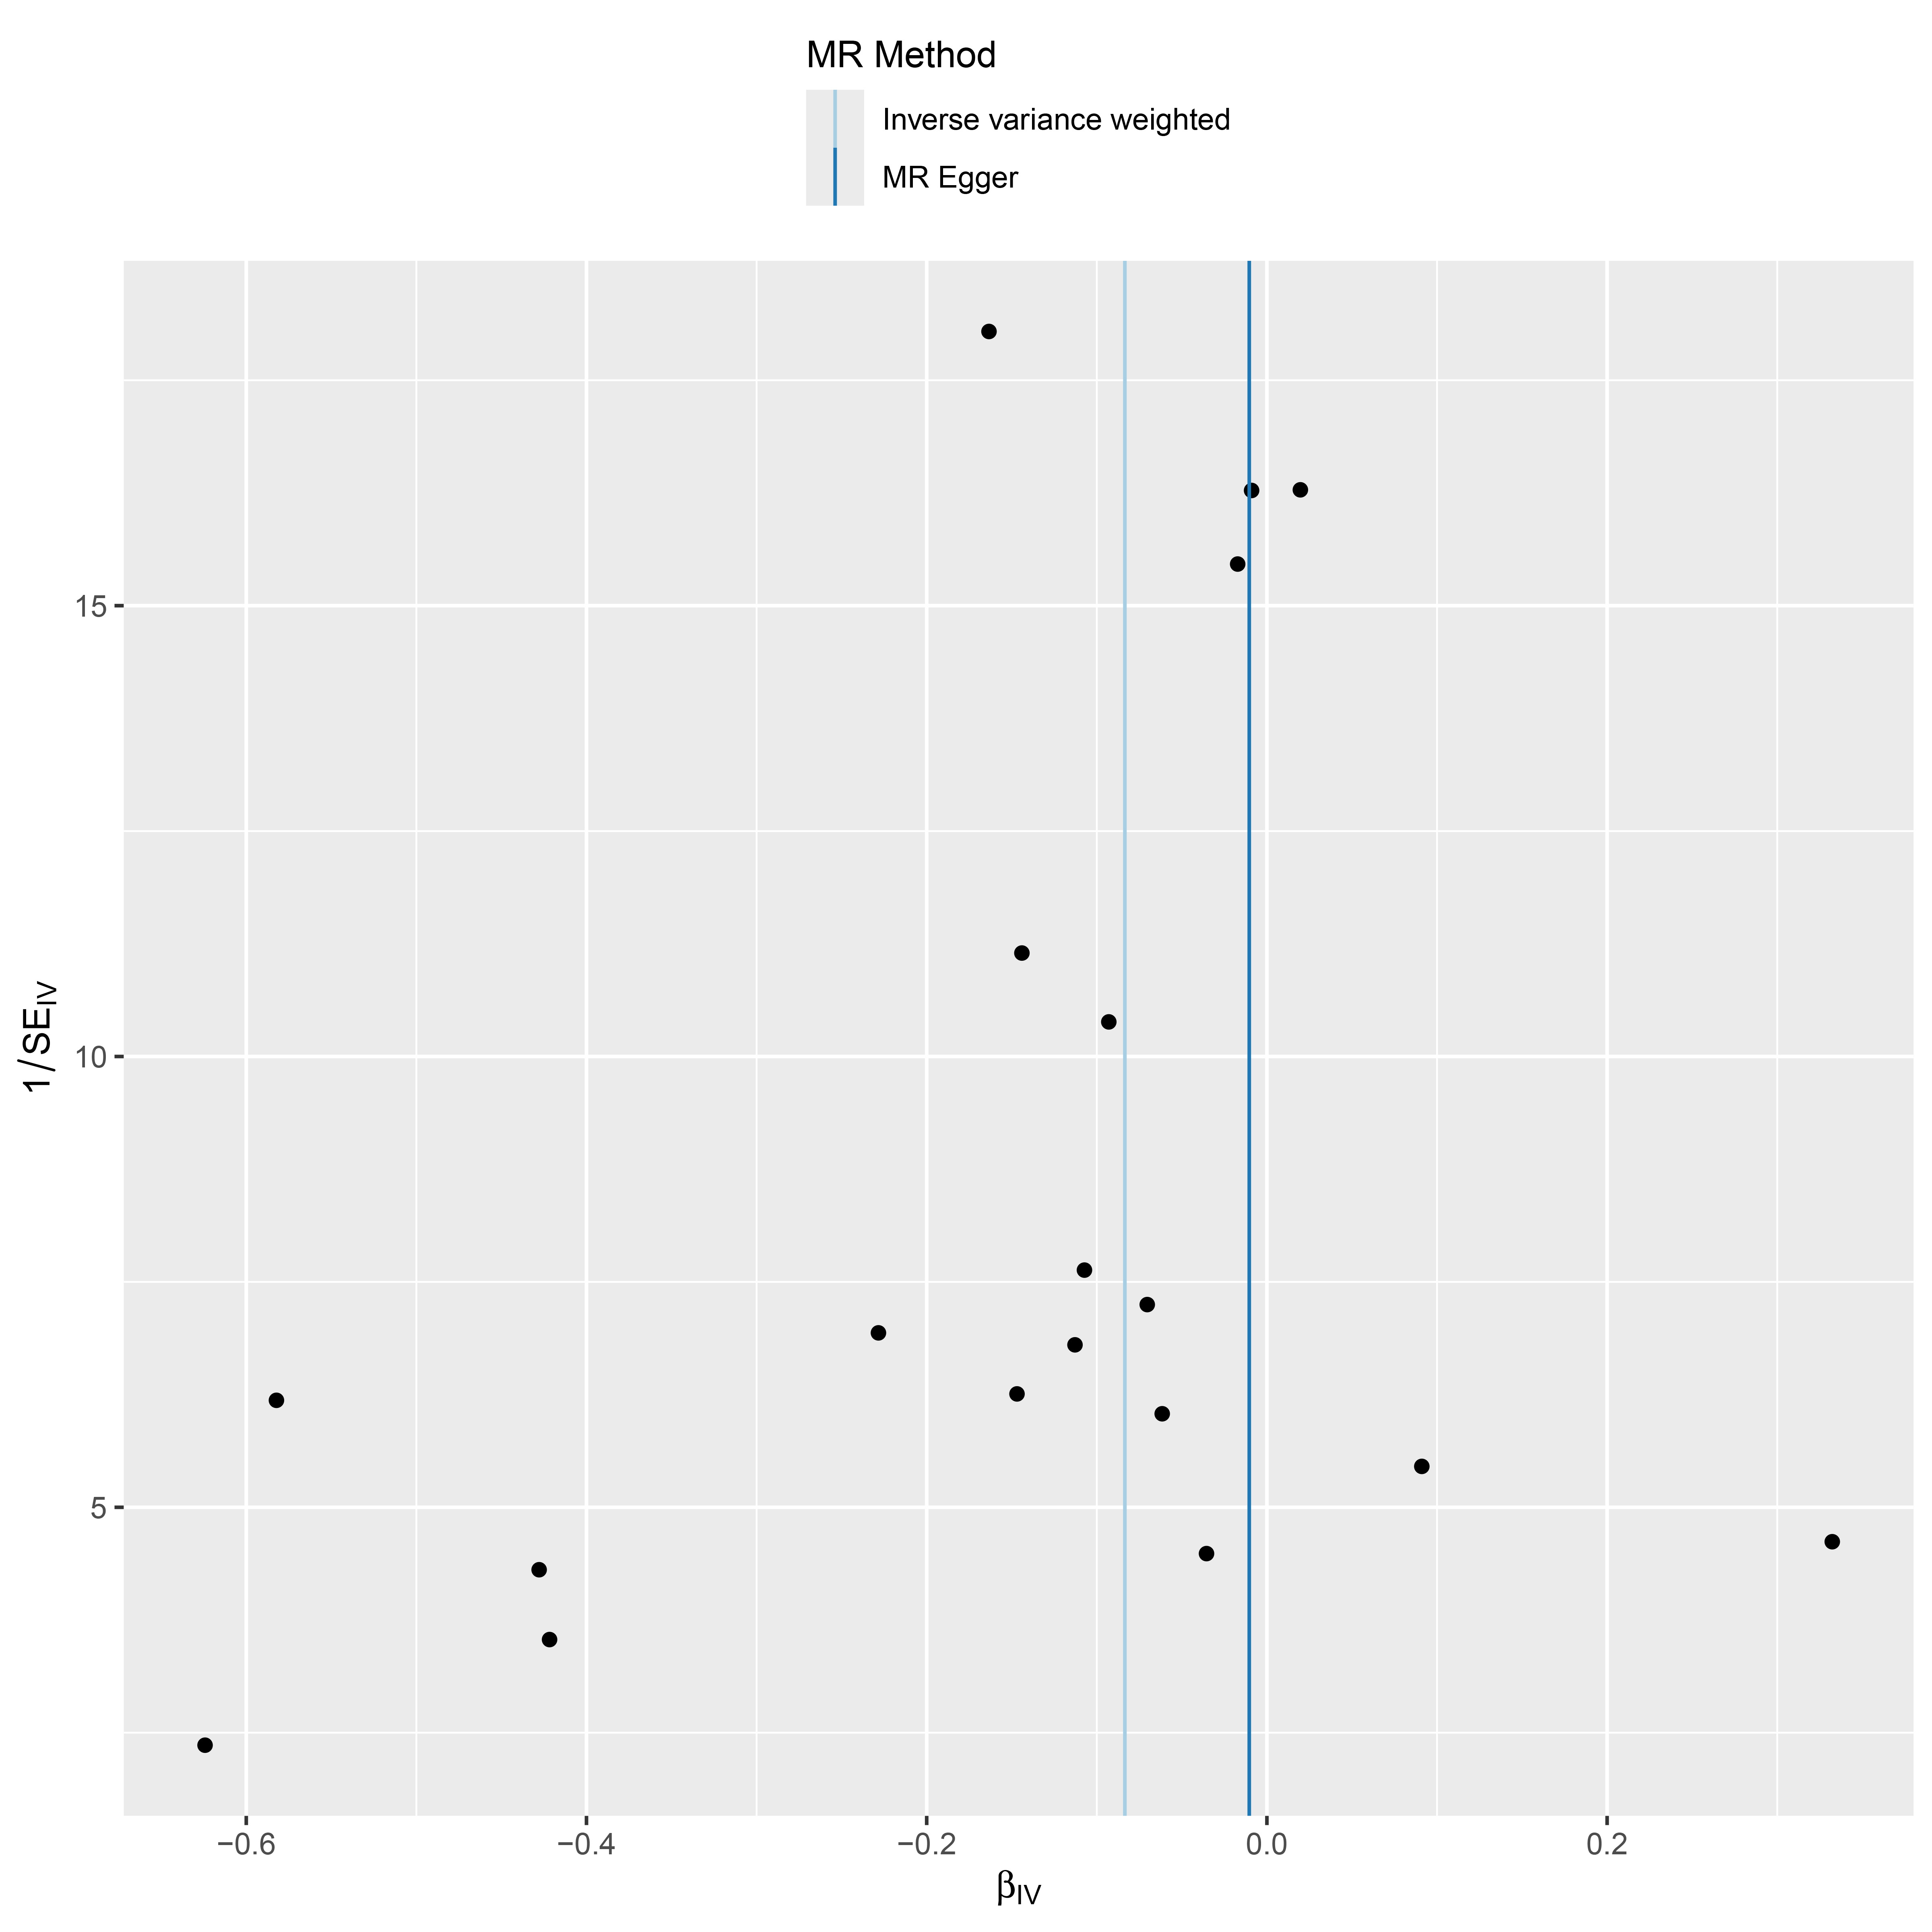


S6(d)


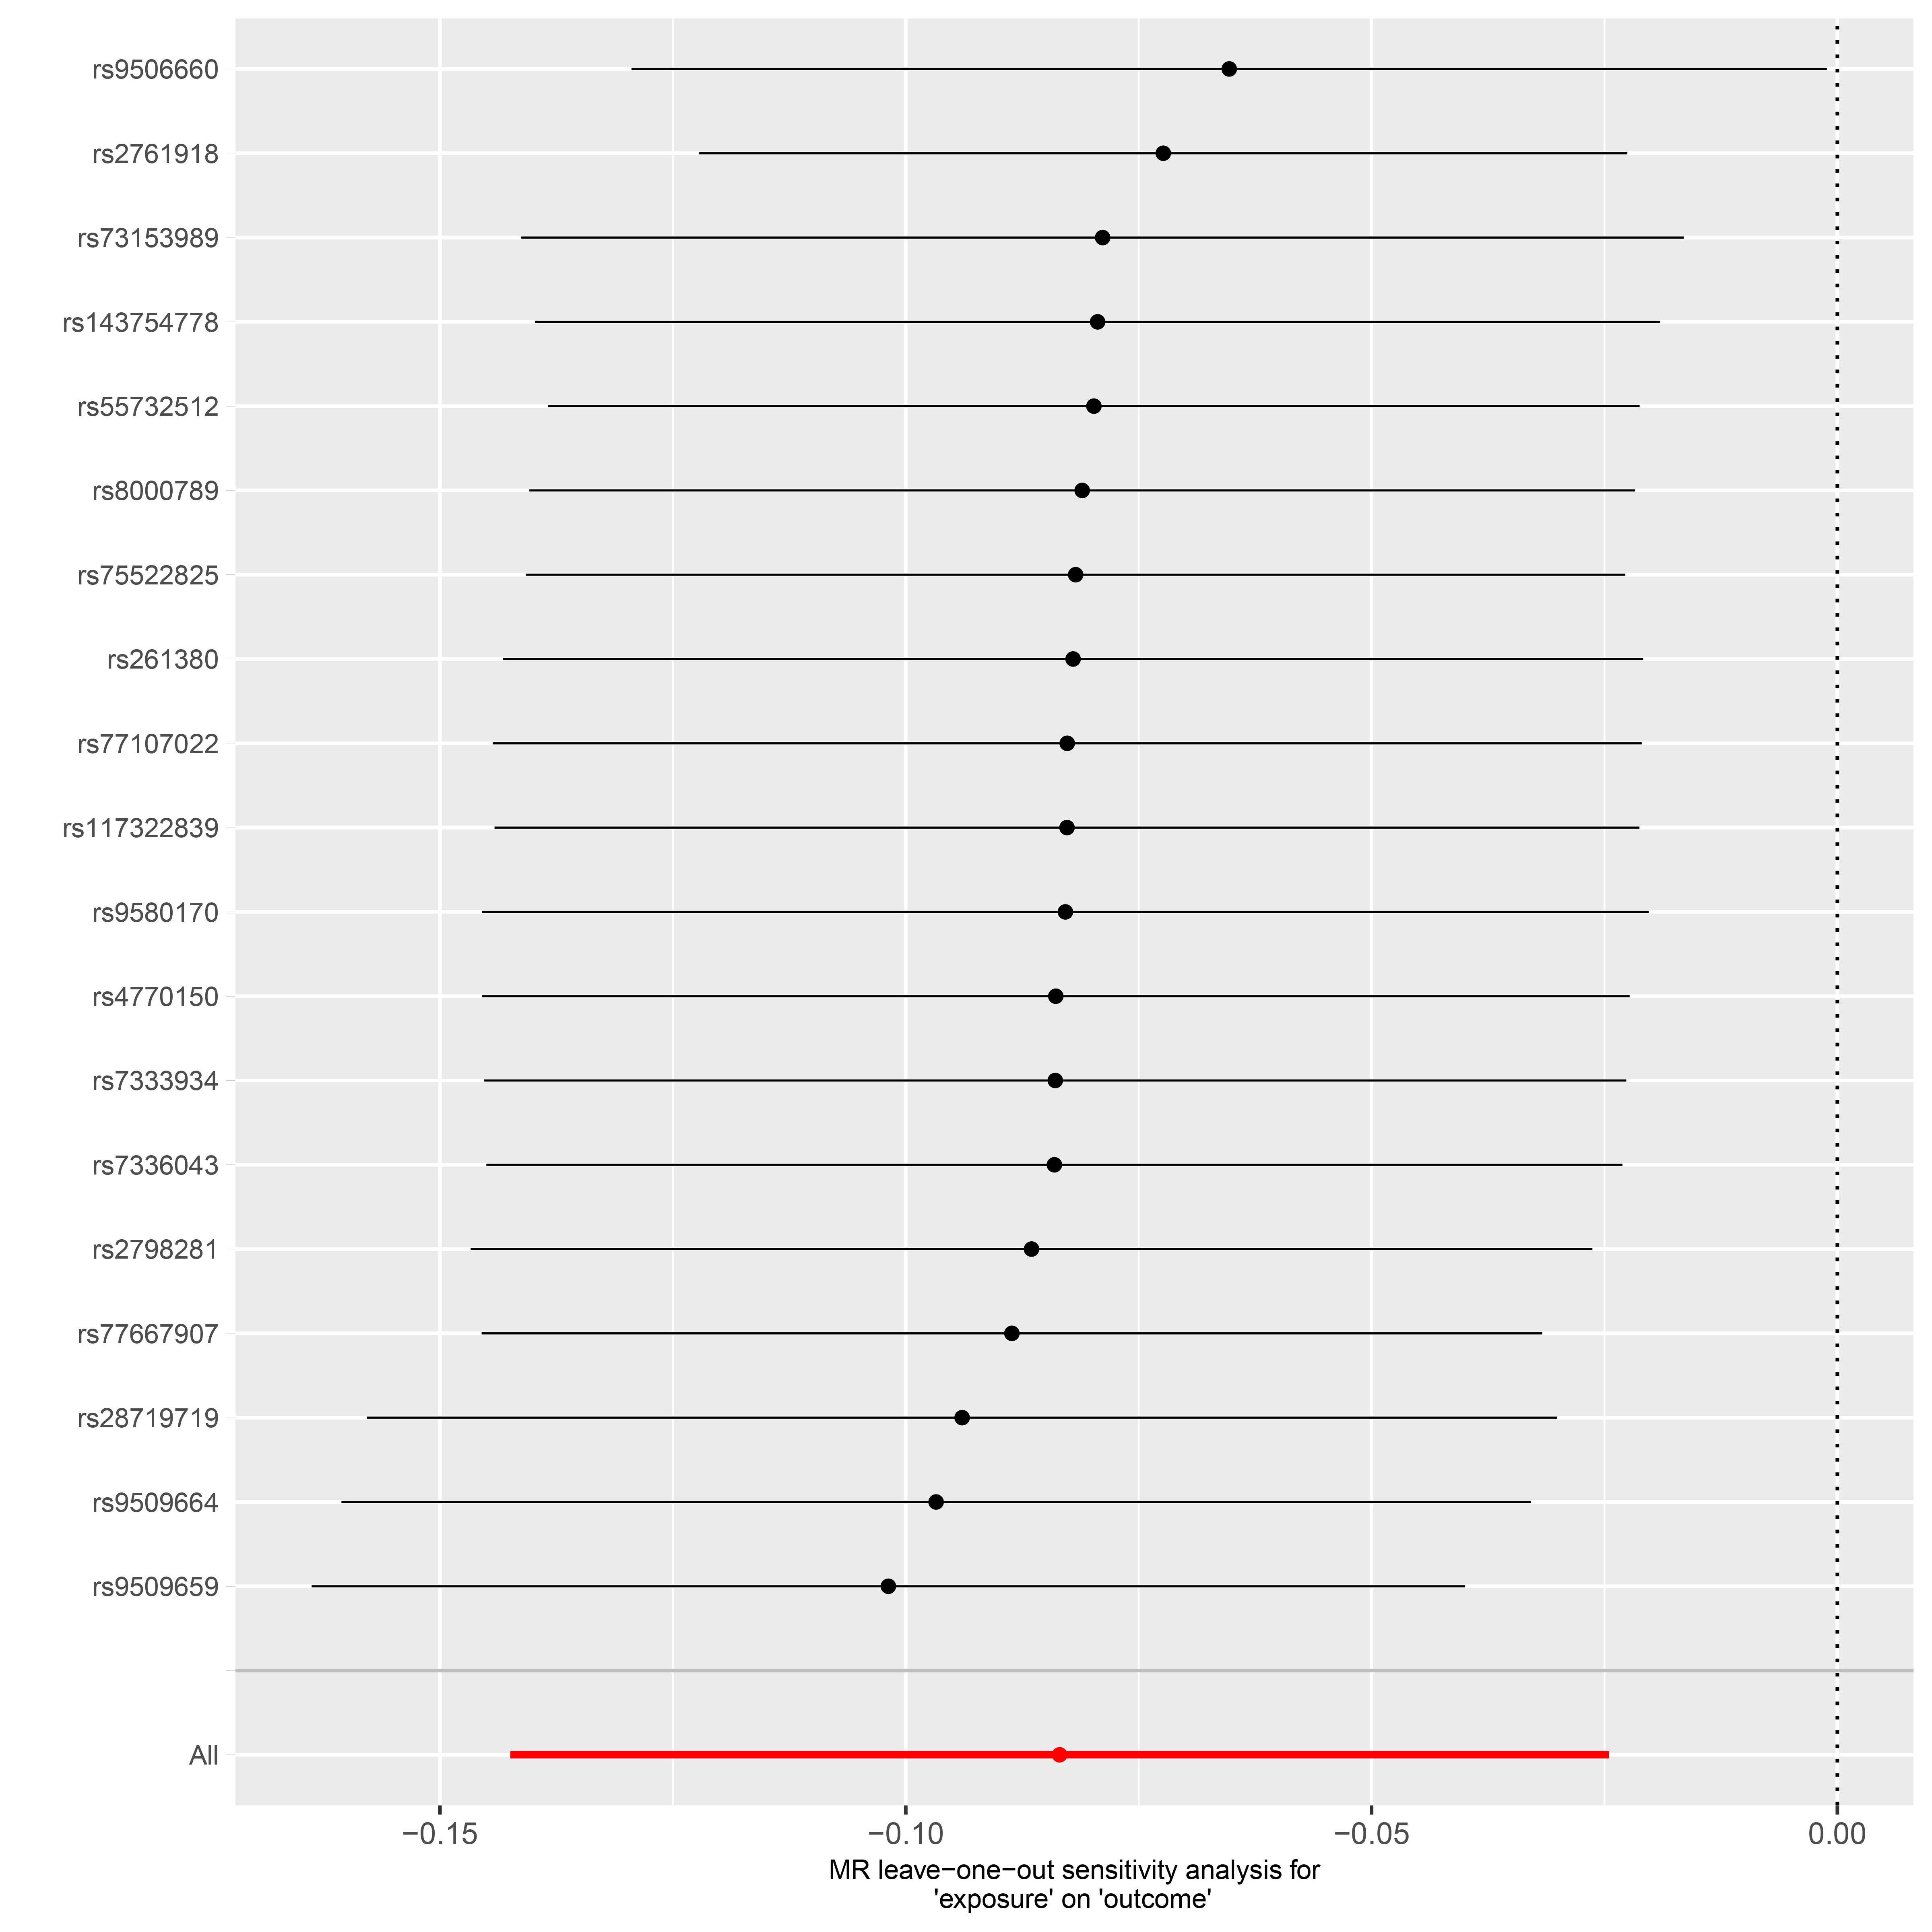


Supplementary Figure S6. Forest plot (a), scatter plot (b), funnel plot (c) and sensitivity analysis (d) of SNPs associated with cg18095732 on Acne vulgaris.

Supplementary Table S1. The Palmitoylation genes

| gene_name | Description |
| --- | --- |
| PPT1 | Palmitoylprotein Thioesterase 1 |
| PPT2 | Palmitoylprotein Thioesterase 2 |
| ZDHHC1 | Zinc Finger DHHC-Type Containing 1 |
| ZDHHC2 | Zinc Finger DHHC-Type Containing 2 |
| ZDHHC3 | Zinc Finger DHHC-Type Containing 3 |
| ZDHHC4 | Zinc Finger DHHC-Type Containing 4 |
| ZDHHC5 | Zinc Finger DHHC-Type Containing 5 |
| ZDHHC6 | Zinc Finger DHHC-Type Containing 6 |
| ZDHHC7 | Zinc Finger DHHC-Type Containing 7 |
| ZDHHC8 | Zinc Finger DHHC-Type Containing 8 |
| ZDHHC11 | Zinc Finger DHHC-Type Containing 11 |
| ZDHHC12 | Zinc Finger DHHC-Type Containing 12 |
| ZDHHC13 | Zinc Finger DHHC-Type Containing 13 |
| ZDHHC14 | Zinc Finger DHHC-Type Containing 14 |
| ZDHHC16 | Zinc Finger DHHC-Type Containing 16 |
| ZDHHC17 | Zinc Finger DHHC-Type Containing 17 |
| ZDHHC18 | Zinc Finger DHHC-Type Containing 18 |
| ZDHHC19 | Zinc Finger DHHC-Type Containing 19 |
| ZDHHC20 | Zinc Finger DHHC-Type Containing 20 |
| ZDHHC21 | Zinc Finger DHHC-Type Containing 21 |
| ZDHHC23 | Zinc Finger DHHC-Type Containing 23 |
| ZDHHC24 | Zinc Finger DHHC-Type Containing 24 |

Supplementary Table S1. Palmitoylation-related genes considered for analysis. From an initial list of 31 candidates, 22 genes with available cis-eQTL data in eQTLGen were retained for MR and SMR analyses..

Supplementary Table S2A: Instrumental variables for Palmitoylation genes

| NO. | Gene | SNP | effect_allele.exposure | other_allele.exposure | effect_allele.outcome | other_allele.outcome | beta.exposure | beta.outcome | eaf.exposure | eaf.outcome | remove | palindromic | ambiguous | id.outcome | pos.outcome | pval.outcome | se.outcome | outcome | mr_keep.outcome | pval_origin.outcome | data_source.outcome | samplesize.outcome | chr.exposure | pos.exposure |
| --- | --- | --- | --- | --- | --- | --- | --- | --- | --- | --- | --- | --- | --- | --- | --- | --- | --- | --- | --- | --- | --- | --- | --- | --- |
| 1 | ZDHHC14 | rs111591466 | T | C | T | C | -0.055326072 | 0.0334646 | 0.62854811099168 | 0.397106 | FALSE | FALSE | FALSE | SdAemx | 157612268 | 0.124786 | 0.0218012 | outcome | TRUE | reported | textfile | 4617 | 6 | 158033300 |
| 2 | ZDHHC14 | rs111883538 | C | T | C | T | 0.0574267794762207 | -0.0204437 | 0.217193457139343 | 0.193148 | FALSE | FALSE | FALSE | SdAemx | 157589311 | 0.452985 | 0.027242 | outcome | TRUE | reported | textfile | 4617 | 6 | 158010343 |
| 3 | ZDHHC14 | rs113570533 | C | T | C | T | 0.173386846873112 | -0.0164477 | 0.0338809587934285 | 0.0144287 | FALSE | FALSE | FALSE | SdAemx | 157181236 | 0.856093 | 0.0906958 | outcome | TRUE | reported | textfile | 4617 | 6 | 157502370 |
| 4 | ZDHHC14 | rs113738669 | C | T | C | T | 0.188515301653129 | 0.0320336 | 0.0418092297421347 | 0.0654916 | FALSE | FALSE | FALSE | SdAemx | 157635900 | 0.459872 | 0.0433439 | outcome | TRUE | reported | textfile | 4617 | 6 | 158056932 |
| 5 | ZDHHC14 | rs113959985 | G | A | G | A | 0.17488323440232 | -0.112326 | 0.0395967848201344 | 0.0211563 | FALSE | FALSE | FALSE | SdAemx | 157331012 | 0.137847 | 0.0756983 | outcome | TRUE | reported | textfile | 4617 | 6 | 157752044 |
| 6 | ZDHHC14 | rs11752028 | T | C | T | C | -0.131593143 | -0.0648897 | 0.0417954605669875 | 0.0553114 | FALSE | FALSE | FALSE | SdAemx | 158261854 | 0.164246 | 0.046652 | outcome | TRUE | reported | textfile | 4617 | 6 | 158682886 |
| 7 | ZDHHC14 | rs139523204 | A | G | A | G | 0.247329616062578 | -0.0884936 | 0.0194193801490781 | 0.0226912 | FALSE | FALSE | FALSE | SdAemx | 157495013 | 0.219804 | 0.072119 | outcome | TRUE | reported | textfile | 4617 | 6 | 157916045 |
| 8 | ZDHHC14 | rs143370621 | G | A | G | A | -0.254959089 | 0.0108975 | 0.0278641066030908 | 0.0461705 | FALSE | FALSE | FALSE | SdAemx | 157448933 | 0.82948 | 0.0505991 | outcome | TRUE | reported | textfile | 4617 | 6 | 157869965 |
| 9 | ZDHHC14 | rs145957750 | T | C | T | C | 0.15704254762657 | -0.00453179 | 0.0670869075470063 | 0.0899563 | FALSE | FALSE | FALSE | SdAemx | 157574492 | 0.903566 | 0.0374041 | outcome | TRUE | reported | textfile | 4617 | 6 | 157995524 |
| 10 | ZDHHC14 | rs1474922 | C | A | C | A | 0.0914754295962626 | 0.0204724 | 0.100721143403276 | 0.0782 | FALSE | FALSE | FALSE | SdAemx | 157451378 | 0.606978 | 0.0397993 | outcome | TRUE | reported | textfile | 4617 | 6 | 157872410 |
| 11 | ZDHHC14 | rs150599380 | T | C | T | C | -0.27917974 | -0.0347918 | 0.0301704069280194 | 0.0379837 | FALSE | FALSE | FALSE | SdAemx | 157524385 | 0.533566 | 0.055884 | outcome | TRUE | reported | textfile | 4617 | 6 | 157945417 |
| 12 | ZDHHC14 | rs17165322 | C | T | C | T | -0.213684516 | -0.00792432 | 0.0383052814857806 | 0.0479248 | FALSE | FALSE | FALSE | SdAemx | 157432627 | 0.874221 | 0.0500591 | outcome | TRUE | reported | textfile | 4617 | 6 | 157853659 |
| 13 | ZDHHC14 | rs186957490 | G | A | G | A | 0.343615256875172 | -0.018621 | 0.0180985742379548 | 0.0219282 | FALSE | FALSE | FALSE | SdAemx | 157413718 | 0.80138 | 0.0740216 | outcome | TRUE | reported | textfile | 4617 | 6 | 157834750 |
| 14 | ZDHHC14 | rs2038586 | T | C | T | C | -0.153951638 | 0.00388678 | 0.160703914508073 | 0.129666 | FALSE | FALSE | FALSE | SdAemx | 157670076 | 0.903202 | 0.0319589 | outcome | TRUE | reported | textfile | 4617 | 6 | 158091108 |
| 15 | ZDHHC14 | rs2135213 | T | G | T | G | -0.234064329 | 0.0127309 | 0.599330015313936 | 0.419976 | FALSE | FALSE | FALSE | SdAemx | 157546675 | 0.553416 | 0.0214814 | outcome | TRUE | reported | textfile | 4617 | 6 | 157967707 |
| 16 | ZDHHC14 | rs2749677 | T | G | T | G | -0.109968402 | 0.020527 | 0.162882882882883 | 0.183111 | FALSE | FALSE | FALSE | SdAemx | 157375962 | 0.454975 | 0.0274739 | outcome | TRUE | reported | textfile | 4617 | 6 | 157796994 |
| 17 | ZDHHC14 | rs34410217 | T | C | T | C | -0.158324668 | -0.0128805 | 0.253436707307094 | 0.254316 | FALSE | FALSE | FALSE | SdAemx | 157557156 | 0.597493 | 0.0243946 | outcome | TRUE | reported | textfile | 4617 | 6 | 157978188 |
| 18 | ZDHHC14 | rs34718793 | G | A | G | A | -0.119873004 | 0.0103053 | 0.452873652975168 | 0.644904 | FALSE | FALSE | FALSE | SdAemx | 157573874 | 0.645795 | 0.0224218 | outcome | TRUE | reported | textfile | 4617 | 6 | 157994906 |
| 19 | ZDHHC14 | rs34781565 | G | A | G | A | -0.370017622 | 0.0832231 | 0.0308471454880295 | 0.0411548 | FALSE | FALSE | FALSE | SdAemx | 157634100 | 0.119269 | 0.0534217 | outcome | TRUE | reported | textfile | 4617 | 6 | 158055132 |
| 20 | ZDHHC14 | rs35057821 | A | G | A | G | -0.161070984 | -0.0102328 | 0.179232105104198 | 0.157018 | FALSE | FALSE | FALSE | SdAemx | 157698790 | 0.726445 | 0.0292485 | outcome | TRUE | reported | textfile | 4617 | 6 | 158119822 |
| 21 | ZDHHC14 | rs35795521 | T | C | T | C | -0.273196659 | 0.0286934 | 0.251987661293826 | 0.274584 | FALSE | FALSE | FALSE | SdAemx | 157442532 | 0.227164 | 0.0237588 | outcome | TRUE | reported | textfile | 4617 | 6 | 157863564 |
| 22 | ZDHHC14 | rs4349837 | A | G | A | G | 0.15783843576021 | 0.0153874 | 0.923954614992351 | 0.09405 | FALSE | FALSE | FALSE | SdAemx | 157540864 | 0.671789 | 0.0363172 | outcome | TRUE | reported | textfile | 4617 | 6 | 157961896 |
| 23 | ZDHHC14 | rs62423255 | C | A | C | A | 0.138559888069742 | -0.0377805 | 0.0599415204678363 | 0.0539635 | FALSE | FALSE | FALSE | SdAemx | 157632552 | 0.424184 | 0.0472738 | outcome | TRUE | reported | textfile | 4617 | 6 | 158053584 |
| 24 | ZDHHC14 | rs62425059 | A | G | A | G | -0.233200844 | -0.135971 | 0.0253206650831354 | 0.0124323 | FALSE | FALSE | FALSE | SdAemx | 157556297 | 0.155434 | 0.0957138 | outcome | TRUE | reported | textfile | 4617 | 6 | 157977329 |
| 25 | ZDHHC14 | rs636169 | A | G | A | G | 0.146680770330171 | -0.113977 | 0.058245748136824 | 0.04792 | FALSE | FALSE | FALSE | SdAemx | 157653472 | 0.0241263 | 0.0505416 | outcome | TRUE | reported | textfile | 4617 | 6 | 158074504 |
| 26 | ZDHHC14 | rs6605508 | G | C | G | C | 0.0644517750358158 | -0.0198752 | 0.319315047103524 | 0.339317 | FALSE | TRUE | FALSE | SdAemx | 157247242 | 0.376672 | 0.0224821 | outcome | TRUE | reported | textfile | 4617 | 6 | 157632391 |
| 27 | ZDHHC14 | rs681502 | T | G | T | G | 0.17256129698401 | -0.0325092 | 0.533813247124276 | 0.468293 | FALSE | FALSE | FALSE | SdAemx | 157650269 | 0.126339 | 0.021266 | outcome | TRUE | reported | textfile | 4617 | 6 | 158071301 |
| 28 | ZDHHC14 | rs733207 | G | T | G | T | -0.10278813 | 0.0120357 | 0.219880269393864 | 0.287785 | FALSE | FALSE | FALSE | SdAemx | 157494655 | 0.609345 | 0.0235529 | outcome | TRUE | reported | textfile | 4617 | 6 | 157915687 |
| 29 | ZDHHC14 | rs749547 | A | G | A | G | -0.150326865 | 0.0306 | 0.195284926835072 | 0.23683 | FALSE | FALSE | FALSE | SdAemx | 157592693 | 0.220924 | 0.0249985 | outcome | TRUE | reported | textfile | 4617 | 6 | 158013725 |
| 30 | ZDHHC14 | rs77040881 | A | G | A | G | -0.262103881 | -0.0873997 | 0.0335678143897322 | 0.0457918 | FALSE | FALSE | FALSE | SdAemx | 157728307 | 0.0897677 | 0.0515137 | outcome | TRUE | reported | textfile | 4617 | 6 | 158149339 |
| 31 | ZDHHC14 | rs77125844 | G | A | G | A | -0.122988386 | -0.229312 | 0.0481834975369458 | 0.0231056 | FALSE | FALSE | FALSE | SdAemx | 157109754 | 0.00314811 | 0.0776568 | outcome | TRUE | reported | textfile | 4617 | 6 | 157430888 |
| 32 | ZDHHC14 | rs79464071 | T | G | T | G | 0.100485239056765 | -0.012804 | 0.18647452035767 | 0.14809 | FALSE | FALSE | FALSE | SdAemx | 157445336 | 0.669982 | 0.0300442 | outcome | TRUE | reported | textfile | 4617 | 6 | 157866368 |
| 33 | ZDHHC14 | rs844134 | T | C | T | C | 0.074090641278726 | 0.0304986 | 0.68579862249918 | 0.29714 | FALSE | FALSE | FALSE | SdAemx | 157760016 | 0.194787 | 0.0235229 | outcome | TRUE | reported | textfile | 4617 | 6 | 158181048 |
| 34 | ZDHHC14 | rs928008 | G | A | G | A | -0.044175383 | -0.0220263 | 0.5195234695028 | 0.582924 | FALSE | FALSE | FALSE | SdAemx | 157774663 | 0.308375 | 0.0216233 | outcome | TRUE | reported | textfile | 4617 | 6 | 158195695 |
| 35 | ZDHHC14 | rs9295141 | T | C | T | C | -0.244681696 | 0.035964 | 0.206787687450671 | 0.251261 | FALSE | FALSE | FALSE | SdAemx | 157684859 | 0.141366 | 0.0244533 | outcome | TRUE | reported | textfile | 4617 | 6 | 158105891 |
| 36 | ZDHHC14 | rs9347482 | A | G | A | G | 0.116746207248892 | -0.0265911 | 0.668138599721899 | 0.375191 | FALSE | FALSE | FALSE | SdAemx | 157678704 | 0.223494 | 0.0218445 | outcome | TRUE | reported | textfile | 4617 | 6 | 158099736 |
| 37 | ZDHHC14 | rs9355262 | T | C | T | C | 0.142739036219093 | -0.0378576 | 0.323231656322902 | 0.388708 | FALSE | FALSE | FALSE | SdAemx | 157483719 | 0.0829125 | 0.0218321 | outcome | TRUE | reported | textfile | 4617 | 6 | 157904751 |
| 38 | ZDHHC14 | rs9355793 | A | G | A | G | -0.099986229 | 0.0398322 | 0.0911191335740072 | 0.138133 | FALSE | FALSE | FALSE | SdAemx | 157586675 | 0.206133 | 0.0315061 | outcome | TRUE | reported | textfile | 4617 | 6 | 158007707 |
| 39 | ZDHHC14 | rs9365290 | A | G | A | G | 0.0611825040724537 | 0.0347966 | 0.150056625141563 | 0.101941 | FALSE | FALSE | FALSE | SdAemx | 157709840 | 0.324852 | 0.0353431 | outcome | TRUE | reported | textfile | 4617 | 6 | 158130872 |
| 40 | ZDHHC14 | rs9456730 | G | T | G | T | -0.06433458 | -0.0534825 | 0.712608017054323 | 0.345539 | FALSE | FALSE | FALSE | SdAemx | 157762711 | 0.0167803 | 0.0223637 | outcome | TRUE | reported | textfile | 4617 | 6 | 158183743 |
| 41 | ZDHHC19 | rs111588574 | T | G | T | G | -0.109614764 | 0.0144007 | 0.10137189024878 | 0.0485645 | FALSE | FALSE | FALSE | 2rKQmZ | 196343513 | 0.774496 | 0.0502643 | outcome | TRUE | reported | textfile | 4617 | 3 | 196070384 |
| 42 | ZDHHC19 | rs11185516 | A | G | A | G | -0.210640403 | 0.0277265 | 0.395223420647149 | 0.364647 | FALSE | FALSE | FALSE | 2rKQmZ | 196201840 | 0.208739 | 0.022057 | outcome | TRUE | reported | textfile | 4617 | 3 | 195928711 |
| 43 | ZDHHC19 | rs114234738 | C | T | C | T | -0.147774562 | 0.0115204 | 0.0490215121643277 | 0.044582 | FALSE | FALSE | FALSE | 2rKQmZ | 195918356 | 0.82563 | 0.0522919 | outcome | TRUE | reported | textfile | 4617 | 3 | 195645227 |
| 44 | ZDHHC19 | rs114665517 | A | G | A | G | -0.236421871 | 0.0792634 | 0.0195146676804156 | 0.0048407 | FALSE | FALSE | FALSE | 2rKQmZ | 195807414 | 0.634867 | 0.16691 | outcome | TRUE | reported | textfile | 4617 | 3 | 195534285 |
| 45 | ZDHHC19 | rs115402043 | G | A | G | A | 0.1923238424715 | -0.0205955 | 0.0239357429718875 | 0.0195002 | FALSE | FALSE | FALSE | 2rKQmZ | 196563292 | 0.789945 | 0.0773156 | outcome | TRUE | reported | textfile | 4617 | 3 | 196290163 |
| 46 | ZDHHC19 | rs115761639 | T | A | T | A | -0.08860294 | 0.019573 | 0.149856298465376 | 0.142949 | FALSE | TRUE | FALSE | 2rKQmZ | 196331284 | 0.519265 | 0.0303704 | outcome | TRUE | reported | textfile | 4617 | 3 | 196058155 |
| 47 | ZDHHC19 | rs12053980 | C | A | C | A | -0.173895357 | 0.0630101 | 0.855738014345036 | 0.15569 | FALSE | FALSE | FALSE | 2rKQmZ | 196240624 | 0.0313033 | 0.0292635 | outcome | TRUE | reported | textfile | 4617 | 3 | 195967495 |
| 48 | ZDHHC19 | rs13315991 | T | C | T | C | -0.109106399 | 0.0597085 | 0.186395322689454 | 0.156496 | FALSE | FALSE | FALSE | 2rKQmZ | 196116126 | 0.0433301 | 0.0295511 | outcome | TRUE | reported | textfile | 4617 | 3 | 195842997 |
| 49 | ZDHHC19 | rs139902270 | T | C | T | C | -0.369423238 | 0.121774 | 0.032457528314457 | 0.0187486 | FALSE | FALSE | FALSE | 2rKQmZ | 196207382 | 0.13243 | 0.0809353 | outcome | TRUE | reported | textfile | 4617 | 3 | 195934253 |
| 50 | ZDHHC19 | rs144713505 | T | C | T | C | 0.144524608819793 | -0.00453131 | 0.962441893948743 | 0.0337611 | FALSE | FALSE | FALSE | 2rKQmZ | 196219187 | 0.939117 | 0.0593264 | outcome | TRUE | reported | textfile | 4617 | 3 | 195946058 |
| 51 | ZDHHC19 | rs1823236 | T | C | T | C | 0.0521622805311394 | -0.00563314 | 0.486730268863833 | 0.54681 | FALSE | FALSE | FALSE | 2rKQmZ | 196037428 | 0.792359 | 0.0213985 | outcome | TRUE | reported | textfile | 4617 | 3 | 195764299 |
| 52 | ZDHHC19 | rs2035531 | C | A | C | A | 0.0709788060823619 | -0.0347968 | 0.687429653125959 | 0.34638 | FALSE | FALSE | FALSE | 2rKQmZ | 196590044 | 0.13266 | 0.0231409 | outcome | TRUE | reported | textfile | 4617 | 3 | 196316915 |
| 53 | ZDHHC19 | rs28651009 | T | C | T | C | 0.0801517915173294 | -0.0197875 | 0.356483279395901 | 0.363201 | FALSE | FALSE | FALSE | 2rKQmZ | 196137525 | 0.379015 | 0.0224931 | outcome | TRUE | reported | textfile | 4617 | 3 | 195864396 |
| 54 | ZDHHC19 | rs3096343 | C | A | C | A | -0.05614577 | 0.0586806 | 0.464882431657427 | 0.401725 | FALSE | FALSE | FALSE | 2rKQmZ | 195798429 | 0.00643102 | 0.0215345 | outcome | TRUE | reported | textfile | 4617 | 3 | 195525300 |
| 55 | ZDHHC19 | rs35821144 | T | C | T | C | -0.056917279 | 0.0108694 | 0.318544848165701 | 0.280836 | FALSE | FALSE | FALSE | 2rKQmZ | 195590839 | 0.647061 | 0.0237401 | outcome | TRUE | reported | textfile | 4617 | 3 | 195317710 |
| 56 | ZDHHC19 | rs3850642 | A | G | A | G | 0.238744660210931 | 0.0440802 | 0.917486601071914 | 0.0495296 | FALSE | FALSE | FALSE | 2rKQmZ | 196191775 | 0.369141 | 0.0490825 | outcome | TRUE | reported | textfile | 4617 | 3 | 195918646 |
| 57 | ZDHHC19 | rs4916521 | A | G | A | G | 0.204065001657168 | -0.0253389 | 0.289034296028881 | 0.288382 | FALSE | FALSE | FALSE | 2rKQmZ | 196221636 | 0.27999 | 0.0234545 | outcome | TRUE | reported | textfile | 4617 | 3 | 195948507 |
| 58 | ZDHHC19 | rs55813550 | G | A | G | A | -0.105887849 | -0.00218814 | 0.294432071269488 | 0.298019 | FALSE | FALSE | FALSE | 2rKQmZ | 195826531 | 0.924909 | 0.0232157 | outcome | TRUE | reported | textfile | 4617 | 3 | 195553402 |
| 59 | ZDHHC19 | rs62409175 | A | C | A | C | -0.066368575 | -0.0182481 | 0.173573940969567 | 0.185943 | FALSE | FALSE | FALSE | 2rKQmZ | 196307591 | 0.503445 | 0.0272734 | outcome | TRUE | reported | textfile | 4617 | 3 | 196034462 |
| 60 | ZDHHC19 | rs62410505 | A | G | A | G | -0.275938723 | 0.145429 | 0.0364653451557495 | 0.0267751 | FALSE | FALSE | FALSE | 2rKQmZ | 196163884 | 0.028213 | 0.0662757 | outcome | TRUE | reported | textfile | 4617 | 3 | 195890755 |
| 61 | ZDHHC19 | rs67751943 | G | A | G | A | -0.099791804 | 0.00448993 | 0.542037513791835 | 0.426445 | FALSE | FALSE | FALSE | 2rKQmZ | 196200556 | 0.83577 | 0.0216584 | outcome | TRUE | reported | textfile | 4617 | 3 | 195927427 |
| 62 | ZDHHC19 | rs6787075 | C | G | C | G | 0.110626285031358 | 0.0290145 | 0.0506763303747917 | 0.053406 | FALSE | TRUE | FALSE | 2rKQmZ | 196203342 | 0.543765 | 0.0477896 | outcome | TRUE | reported | textfile | 4617 | 3 | 195930213 |
| 63 | ZDHHC19 | rs7374260 | C | T | C | T | 0.100680832155991 | -0.00763059 | 0.53808861663347 | 0.374417 | FALSE | FALSE | FALSE | 2rKQmZ | 196431461 | 0.728645 | 0.0219947 | outcome | TRUE | reported | textfile | 4617 | 3 | 196158332 |
| 64 | ZDHHC19 | rs75792959 | C | T | C | T | -0.271309602 | 0.183248 | 0.0309273207961291 | 0.031302 | FALSE | FALSE | FALSE | 2rKQmZ | 196533072 | 0.00178875 | 0.0586725 | outcome | TRUE | reported | textfile | 4617 | 3 | 196259943 |
| 65 | ZDHHC19 | rs7622459 | A | G | A | G | -0.100004425 | 0.00154398 | 0.391188704903608 | 0.389944 | FALSE | FALSE | FALSE | 2rKQmZ | 196199814 | 0.943845 | 0.0219195 | outcome | TRUE | reported | textfile | 4617 | 3 | 195926685 |
| 66 | ZDHHC19 | rs7623111 | G | A | G | A | -0.101531288 | 0.0247853 | 0.588442950992977 | 0.392275 | FALSE | FALSE | FALSE | 2rKQmZ | 196526851 | 0.254402 | 0.0217468 | outcome | TRUE | reported | textfile | 4617 | 3 | 196253722 |
| 67 | ZDHHC19 | rs78180666 | C | T | C | T | 0.14982370267268 | -0.0572021 | 0.073246703611695 | 0.112368 | FALSE | FALSE | FALSE | 2rKQmZ | 196169101 | 0.0887115 | 0.0336041 | outcome | TRUE | reported | textfile | 4617 | 3 | 195895972 |
| 68 | ZDHHC19 | rs79051088 | T | C | T | C | -0.143631526 | -0.0296722 | 0.0535518376302798 | 0.0518936 | FALSE | FALSE | FALSE | 2rKQmZ | 196176584 | 0.538016 | 0.0481835 | outcome | TRUE | reported | textfile | 4617 | 3 | 195903455 |
| 69 | ZDHHC19 | rs939892 | T | C | T | C | 0.0922645457302751 | 0.00627811 | 0.140428021438816 | 0.135419 | FALSE | FALSE | FALSE | 2rKQmZ | 196199363 | 0.841126 | 0.0313195 | outcome | TRUE | reported | textfile | 4617 | 3 | 195926234 |
| 70 | ZDHHC19 | rs9823320 | G | A | G | A | -0.105441383 | 0.00307855 | 0.0702206685601923 | 0.0760262 | FALSE | FALSE | FALSE | 2rKQmZ | 196044758 | 0.939419 | 0.0405073 | outcome | TRUE | reported | textfile | 4617 | 3 | 195771629 |
| 71 | ZDHHC19 | rs9842342 | T | G | T | G | -0.070766978 | 0.00874291 | 0.199558601463585 | 0.209428 | FALSE | FALSE | FALSE | 2rKQmZ | 196173437 | 0.74019 | 0.0263656 | outcome | TRUE | reported | textfile | 4617 | 3 | 195900308 |
| 72 | ZDHHC20 | rs112506767 | C | T | C | T | -0.200008568 | -0.0063373 | 0.0297937137275182 | 0.0427938 | FALSE | FALSE | FALSE | yaBhmT | 21354741 | 0.904825 | 0.0530014 | outcome | TRUE | reported | textfile | 4617 | 13 | 21928880 |
| 73 | ZDHHC20 | rs113842275 | A | C | A | C | 0.109807283287037 | 0.0450122 | 0.951663866890649 | 0.0417921 | FALSE | FALSE | FALSE | yaBhmT | 21345471 | 0.408735 | 0.0544862 | outcome | TRUE | reported | textfile | 4617 | 13 | 21919610 |
| 74 | ZDHHC20 | rs116975298 | T | C | T | C | -0.254561849 | 0.0569605 | 0.0226386481802426 | 0.0472144 | FALSE | FALSE | FALSE | yaBhmT | 21420710 | 0.253198 | 0.0498509 | outcome | TRUE | reported | textfile | 4617 | 13 | 21994849 |
| 75 | ZDHHC20 | rs117322839 | A | G | A | G | 0.209880887388646 | -0.0519275 | 0.0201786892735672 | 0.0261218 | FALSE | FALSE | FALSE | yaBhmT | 21493363 | 0.442833 | 0.0676652 | outcome | TRUE | reported | textfile | 4617 | 13 | 22067502 |
| 76 | ZDHHC20 | rs12583648 | C | G | C | G | -0.068052132 | 0.0237746 | 0.358887985441592 | 0.357427 | FALSE | TRUE | FALSE | yaBhmT | 21325916 | 0.283174 | 0.0221527 | outcome | TRUE | reported | textfile | 4617 | 13 | 21900055 |
| 77 | ZDHHC20 | rs148153530 | T | C | T | C | -0.262408429 | 0.0645498 | 0.0143746854554605 | 0.0106899 | FALSE | FALSE | FALSE | yaBhmT | 21339492 | 0.538912 | 0.105052 | outcome | TRUE | reported | textfile | 4617 | 13 | 21913631 |
| 78 | ZDHHC20 | rs2181329 | A | C | A | C | 0.168990710877357 | -0.0621683 | 0.806365431525148 | 0.178898 | FALSE | FALSE | FALSE | yaBhmT | 21510813 | 0.0259974 | 0.0279251 | outcome | TRUE | reported | textfile | 4617 | 13 | 22084952 |
| 79 | ZDHHC20 | rs261392 | T | A | T | A | 0.0553259385918111 | 0.0260787 | 0.66755720757347 | 0.653745 | FALSE | TRUE | FALSE | yaBhmT | 21231023 | 0.246174 | 0.0224876 | outcome | TRUE | reported | textfile | 4617 | 13 | 21805162 |
| 80 | ZDHHC20 | rs41284199 | C | T | C | T | 0.196672940591035 | -0.119375 | 0.0177233137532915 | 0.0210002 | FALSE | FALSE | FALSE | yaBhmT | 21376570 | 0.11165 | 0.0750398 | outcome | TRUE | reported | textfile | 4617 | 13 | 21950709 |
| 81 | ZDHHC20 | rs4770150 | A | G | A | G | 0.121039171024016 | 0.0159634 | 0.126165142455153 | 0.133664 | FALSE | FALSE | FALSE | yaBhmT | 21384495 | 0.61009 | 0.0313043 | outcome | TRUE | reported | textfile | 4617 | 13 | 21958634 |
| 82 | ZDHHC20 | rs73158463 | G | A | G | A | -0.144691022 | 0.048881 | 0.0302724781552143 | 0.0502064 | FALSE | FALSE | FALSE | yaBhmT | 21598063 | 0.322614 | 0.0494196 | outcome | TRUE | reported | textfile | 4617 | 13 | 22172202 |
| 83 | ZDHHC20 | rs74039340 | C | T | C | T | -0.086426024 | 0.0898947 | 0.158884113524606 | 0.167281 | FALSE | FALSE | FALSE | yaBhmT | 21530207 | 0.00134267 | 0.0280334 | outcome | TRUE | reported | textfile | 4617 | 13 | 22104346 |
| 84 | ZDHHC20 | rs75615472 | G | A | G | A | 0.109624596213837 | -0.0451663 | 0.858372663771946 | 0.124134 | FALSE | FALSE | FALSE | yaBhmT | 21296984 | 0.161928 | 0.0322936 | outcome | TRUE | reported | textfile | 4617 | 13 | 21871123 |
| 85 | ZDHHC20 | rs77107022 | T | C | T | C | -0.148607759 | -0.071845 | 0.0268492100668569 | 0.0144928 | FALSE | FALSE | FALSE | yaBhmT | 21381496 | 0.413112 | 0.087784 | outcome | TRUE | reported | textfile | 4617 | 13 | 21955635 |
| 86 | ZDHHC20 | rs79745409 | A | G | A | G | -0.26071531 | 0.0998109 | 0.0173170442414897 | 0.00551584 | FALSE | FALSE | FALSE | yaBhmT | 21420417 | 0.489648 | 0.144471 | outcome | TRUE | reported | textfile | 4617 | 13 | 21994556 |
| 87 | ZDHHC20 | rs7981970 | A | G | A | G | -0.228437868 | 0.0594128 | 0.425357641641188 | 0.428716 | FALSE | FALSE | FALSE | yaBhmT | 21445776 | 0.00546148 | 0.0213833 | outcome | TRUE | reported | textfile | 4617 | 13 | 22019915 |
| 88 | ZDHHC20 | rs9506713 | G | A | G | A | 0.0564621971984954 | 0.00453631 | 0.212802494966642 | 0.256546 | FALSE | FALSE | FALSE | yaBhmT | 21609313 | 0.852694 | 0.0244305 | outcome | TRUE | reported | textfile | 4617 | 13 | 22183452 |
| 89 | ZDHHC20 | rs9509831 | C | A | C | A | 0.0481900546003871 | -0.0129901 | 0.381189504839613 | 0.384055 | FALSE | FALSE | FALSE | yaBhmT | 21666816 | 0.561184 | 0.022355 | outcome | TRUE | reported | textfile | 4617 | 13 | 22240955 |
| 90 | ZDHHC20 | rs9550727 | T | G | T | G | 0.10282285473924 | -0.0433287 | 0.513667866960932 | 0.512788 | FALSE | FALSE | FALSE | yaBhmT | 21345254 | 0.0433401 | 0.0214455 | outcome | TRUE | reported | textfile | 4617 | 13 | 21919393 |

Supplementary Table S2B: Instrumental variables for Palmitoylation genes

| NO. | gene.exposure | SNP | pval.exposure | samplesize.exposure | se.exposure | exposure | mr_keep.exposure | pval_origin.exposure | id.exposure | data_source.exposure | action | SNP_index | mr_keep | R2 | f | meanf | units.outcome | units.exposure | rsq.exposure | effective_n.exposure | rsq.outcome | effective_n.outcome | steiger_dir | steiger_pval |
| --- | --- | --- | --- | --- | --- | --- | --- | --- | --- | --- | --- | --- | --- | --- | --- | --- | --- | --- | --- | --- | --- | --- | --- | --- |
| 1 | ZDHHC14 | rs111591466 | 5.0518e-11 | 30194 | 0.00842178457921728 | exposure | TRUE | reported | YRAE8b | textfile | 2 | 1 | TRUE | 0.00142728419661444 | 43.1541577115029 | 159.32308789477 | NA | NA | 0.00142737860883766 | 30194 | 0.00051029005014057 | 4617 | TRUE | 0.336078399150921 |
| 2 | ZDHHC14 | rs111883538 | 1.0186e-08 | 29254 | 0.0100263250709234 | exposure | TRUE | reported | YRAE8b | textfile | 2 | 1 | TRUE | 0.00112014271648858 | 32.8031589623133 | 159.32308789477 | NA | NA | 0.00112021921641413 | 29254 | 0.00012201587031166 | 4617 | TRUE | 0.156671382880974 |
| 3 | ZDHHC14 | rs113570533 | 9.0535e-12 | 23640 | 0.0254195641215528 | exposure | TRUE | reported | YRAE8b | textfile | 2 | 1 | TRUE | 0.00196424080591077 | 46.5221047867176 | 159.32308789477 | NA | NA | 0.00196440667292474 | 23640 | 7.12625239379039e-06 | 4617 | TRUE | 0.00960453992881085 |
| 4 | ZDHHC14 | rs113738669 | 1.3069e-19 | 28827 | 0.0208076581036357 | exposure | TRUE | reported | YRAE8b | textfile | 2 | 1 | TRUE | 0.00283930802824887 | 82.0760932246938 | 159.32308789477 | NA | NA | 0.00283950447201646 | 28827 | 0.00011834023360122 | 4617 | TRUE | 0.00741293312862335 |
| 5 | ZDHHC14 | rs113959985 | 6.7146e-12 | 20253 | 0.0254790690874325 | exposure | TRUE | reported | YRAE8b | textfile | 2 | 1 | TRUE | 0.00232076310806414 | 47.1070981168444 | 159.32308789477 | NA | NA | 0.00232099177594582 | 20253 | 0.000476880400118009 | 4617 | TRUE | 0.105947227325093 |
| 6 | ZDHHC14 | rs11752028 | 6.5414e-10 | 27507 | 0.0213044201719981 | exposure | TRUE | reported | YRAE8b | textfile | 2 | 1 | TRUE | 0.00138510243295262 | 38.1500841927946 | 159.32308789477 | NA | NA | 0.00138520300985027 | 27507 | 0.000419041723888712 | 4617 | TRUE | 0.29204793537381 |
| 7 | ZDHHC14 | rs139523204 | 3.5263e-13 | 22704 | 0.0340074821337832 | exposure | TRUE | reported | YRAE8b | textfile | 2 | 1 | TRUE | 0.00232428998103176 | 52.8889604302182 | 159.32308789477 | NA | NA | 0.00232449427027344 | 22704 | 0.000326145178077581 | 4617 | TRUE | 0.0615631934708363 |
| 8 | ZDHHC14 | rs143370621 | 1.6521e-23 | 28350 | 0.0255165773296503 | exposure | TRUE | reported | YRAE8b | textfile | 2 | 1 | TRUE | 0.00350926656875013 | 99.8310223602217 | 159.32308789477 | NA | NA | 0.00350951328462082 | 28350 | 1.00506025857337e-05 | 4617 | TRUE | 0.000405549769981807 |
| 9 | ZDHHC14 | rs145957750 | 1.131e-20 | 28157 | 0.016844275316047 | exposure | TRUE | reported | YRAE8b | textfile | 2 | 1 | TRUE | 0.00307754914706124 | 86.9158841406122 | 159.32308789477 | NA | NA | 0.00307776708896624 | 28157 | 3.18073910260972e-06 | 4617 | TRUE | 0.000713537939032364 |
| 10 | ZDHHC14 | rs1474922 | 6.773e-11 | 28094 | 0.0140175043054128 | exposure | TRUE | reported | YRAE8b | textfile | 2 | 1 | TRUE | 0.00151354771828574 | 42.5830339559648 | 159.32308789477 | NA | NA | 0.0015136553116738 | 28094 | 5.73310696788394e-05 | 4617 | TRUE | 0.0484054316411614 |
| 11 | ZDHHC14 | rs150599380 | 3.6071e-28 | 26553 | 0.0253682146969425 | exposure | TRUE | reported | YRAE8b | textfile | 2 | 1 | TRUE | 0.00454044074583683 | 121.103103709242 | 159.32308789477 | NA | NA | 0.00454078120936723 | 26553 | 8.39789905110104e-05 | 4617 | TRUE | 0.000255504558581272 |
| 12 | ZDHHC14 | rs17165322 | 1.3075e-20 | 25751 | 0.0229583148875594 | exposure | TRUE | reported | YRAE8b | textfile | 2 | 1 | TRUE | 0.00335284458124934 | 86.6228280020686 | 159.32308789477 | NA | NA | 0.00335310413324315 | 25751 | 5.42980048246988e-06 | 4617 | TRUE | 0.000500540166174231 |
| 13 | ZDHHC14 | rs186957490 | 1.4158e-16 | 16272 | 0.0415822904187295 | exposure | TRUE | reported | YRAE8b | textfile | 2 | 1 | TRUE | 0.00417896202199925 | 68.2770392519362 | 159.32308789477 | NA | NA | 0.00417947357653651 | 16272 | 1.37123346308355e-05 | 4617 | TRUE | 0.000252808782730069 |
| 14 | ZDHHC14 | rs2038586 | 1.4045e-44 | 30688 | 0.0109908146213023 | exposure | TRUE | reported | YRAE8b | textfile | 2 | 1 | TRUE | 0.00635290617852064 | 196.191666242732 | 159.32308789477 | NA | NA | 0.00635331760680376 | 30688 | 3.20496414848273e-06 | 4617 | TRUE | 7.59989813453895e-07 |
| 15 | ZDHHC14 | rs2135213 | 2.7142e-179 | 30981 | 0.00819805575093918 | exposure | TRUE | reported | YRAE8b | textfile | 2 | 1 | TRUE | 0.025637395801222 | 815.118397507821 | 159.32308789477 | NA | NA | 0.025639008511664 | 30981 | 7.61006371261787e-05 | 4617 | TRUE | 3.58564959182904e-22 |
| 16 | ZDHHC14 | rs2749677 | 2.4425e-21 | 27275 | 0.01159502762539 | exposure | TRUE | reported | YRAE8b | textfile | 2 | 1 | TRUE | 0.00328698422184889 | 89.9415571617641 | 159.32308789477 | NA | NA | 0.00328722447258529 | 27275 | 0.0001209444946566 | 4617 | TRUE | 0.00355913484730942 |
| 17 | ZDHHC14 | rs34410217 | 2.0947e-62 | 29303 | 0.00949644122319093 | exposure | TRUE | reported | YRAE8b | textfile | 2 | 1 | TRUE | 0.00939643694777535 | 277.93661286503 | 159.32308789477 | NA | NA | 0.00939707229386938 | 29303 | 6.04060031640497e-05 | 4617 | TRUE | 1.61424972862284e-08 |
| 18 | ZDHHC14 | rs34718793 | 4.0763e-49 | 30473 | 0.00813757593676983 | exposure | TRUE | reported | YRAE8b | textfile | 2 | 1 | TRUE | 0.00707059281879468 | 216.982226755798 | 159.32308789477 | NA | NA | 0.00707105362390628 | 30473 | 4.57708255484692e-05 | 4617 | TRUE | 9.22913459866941e-07 |
| 19 | ZDHHC14 | rs34781565 | 3.4733e-51 | 27667 | 0.0245867053490627 | exposure | TRUE | reported | YRAE8b | textfile | 2 | 1 | TRUE | 0.00811972510264116 | 226.471077860494 | 159.32308789477 | NA | NA | 0.00812030733943417 | 27667 | 0.000525596349957902 | 4617 | TRUE | 2.23353756466806e-05 |
| 20 | ZDHHC14 | rs35057821 | 5.5999e-54 | 31349 | 0.0104125014112566 | exposure | TRUE | reported | YRAE8b | textfile | 2 | 1 | TRUE | 0.00757527429612168 | 239.274694805801 | 159.32308789477 | NA | NA | 0.00757575395196639 | 31349 | 2.65215285988323e-05 | 4617 | TRUE | 1.91587776926573e-07 |
| 21 | ZDHHC14 | rs35795521 | 6.569e-174 | 28092 | 0.00971739045511042 | exposure | TRUE | reported | YRAE8b | textfile | 2 | 1 | TRUE | 0.0273664244001807 | 790.35196880491 | 159.32308789477 | NA | NA | 0.0273683195551364 | 28092 | 0.000315941069106694 | 4617 | TRUE | 5.88778194809036e-21 |
| 22 | ZDHHC14 | rs4349837 | 2.0664e-23 | 28393 | 0.0158313375887874 | exposure | TRUE | reported | YRAE8b | textfile | 2 | 1 | TRUE | 0.00348868108197928 | 99.3938982108261 | 159.32308789477 | NA | NA | 0.00348892598418998 | 28393 | 3.88970955024762e-05 | 4617 | TRUE | 0.000860300539322643 |
| 23 | ZDHHC14 | rs62423255 | 4.2679e-15 | 28459 | 0.0176576893169035 | exposure | TRUE | reported | YRAE8b | textfile | 2 | 1 | TRUE | 0.00215898200218532 | 61.5710816934188 | 159.32308789477 | NA | NA | 0.00215913341101071 | 28459 | 0.00013837657266836 | 4617 | TRUE | 0.0286175635439417 |
| 24 | ZDHHC14 | rs62425059 | 7.4416e-17 | 25911 | 0.0279624024126174 | exposure | TRUE | reported | YRAE8b | textfile | 2 | 1 | TRUE | 0.0026770895142313 | 69.5468954888793 | 159.32308789477 | NA | NA | 0.00267729561420846 | 25911 | 0.000437101088616874 | 4617 | TRUE | 0.0533029807374855 |
| 25 | ZDHHC14 | rs636169 | 1.1524e-17 | 31026 | 0.017140409732889 | exposure | TRUE | reported | YRAE8b | textfile | 2 | 1 | TRUE | 0.00235480144785498 | 73.2277970407478 | 159.32308789477 | NA | NA | 0.0023549528955085 | 31026 | 0.0011007443245549 | 4617 | TRUE | 0.32980644198382 |
| 26 | ZDHHC14 | rs6605508 | 3.5341e-11 | 24288 | 0.00973209540600607 | exposure | TRUE | reported | YRAE8b | textfile | 2 | 1 | TRUE | 0.00180252692838059 | 43.8552191962022 | 159.32308789477 | NA | NA | 0.00180267510243626 | 24288 | 0.000169318346664737 | 4617 | TRUE | 0.0664945997734469 |
| 27 | ZDHHC14 | rs681502 | 2.0452e-103 | 31463 | 0.0079911687035292 | exposure | TRUE | reported | YRAE8b | textfile | 2 | 1 | TRUE | 0.0146041668245442 | 466.271194781047 | 159.32308789477 | NA | NA | 0.0146050816633462 | 31463 | 0.000506115201158864 | 4617 | TRUE | 3.46472311647686e-10 |
| 28 | ZDHHC14 | rs733207 | 9.0966e-25 | 29129 | 0.0100034188444347 | exposure | TRUE | reported | YRAE8b | textfile | 2 | 1 | TRUE | 0.003611537556723 | 105.574540833926 | 159.32308789477 | NA | NA | 0.00361178464660255 | 29129 | 5.65793108849671e-05 | 4617 | TRUE | 0.000891454907115452 |
| 29 | ZDHHC14 | rs749547 | 2.2142e-48 | 30078 | 0.0102850189188697 | exposure | TRUE | reported | YRAE8b | textfile | 2 | 1 | TRUE | 0.00705245563000859 | 213.616174117957 | 159.32308789477 | NA | NA | 0.00705292129799738 | 30078 | 0.000324565435059668 | 4617 | TRUE | 2.85639867640018e-05 |
| 30 | ZDHHC14 | rs77040881 | 4.0488e-30 | 29170 | 0.022986326041758 | exposure | TRUE | reported | YRAE8b | textfile | 2 | 1 | TRUE | 0.00443751539845412 | 130.010372170575 | 159.32308789477 | NA | NA | 0.00443781832100701 | 29170 | 0.000623349890841617 | 4617 | TRUE | 0.00842009975719535 |
| 31 | ZDHHC14 | rs77125844 | 6.0702e-11 | 30845 | 0.0188003891609548 | exposure | TRUE | reported | YRAE8b | textfile | 2 | 1 | TRUE | 0.00138550346620723 | 42.7923723885011 | 159.32308789477 | NA | NA | 0.00138559318405064 | 30845 | 0.00188583242117306 | 4617 | FALSE | 0.693880981250665 |
| 32 | ZDHHC14 | rs79464071 | 2.3524e-20 | 27899 | 0.0108691443003532 | exposure | TRUE | reported | YRAE8b | textfile | 2 | 1 | TRUE | 0.00305419487750329 | 85.4638978968775 | 159.32308789477 | NA | NA | 0.00305441317094735 | 27899 | 3.93533080923509e-05 | 4617 | TRUE | 0.00202661780823296 |
| 33 | ZDHHC14 | rs844134 | 8.8858e-17 | 29253 | 0.00890630266967099 | exposure | TRUE | reported | YRAE8b | textfile | 2 | 1 | TRUE | 0.00236012603215543 | 69.199365791191 | 159.32308789477 | NA | NA | 0.00236028702189645 | 29253 | 0.000364123084233 | 4617 | TRUE | 0.0622318124759523 |
| 34 | ZDHHC14 | rs928008 | 3.0735e-08 | 31470 | 0.00797807207528135 | exposure | TRUE | reported | YRAE8b | textfile | 2 | 1 | TRUE | 0.000973296334731027 | 30.6575279208733 | 159.32308789477 | NA | NA | 0.000973358133953655 | 31470 | 0.000224786286553833 | 4617 | TRUE | 0.303675749942519 |
| 35 | ZDHHC14 | rs9295141 | 1.9861e-136 | 31468 | 0.00984222682850896 | exposure | TRUE | reported | YRAE8b | textfile | 2 | 1 | TRUE | 0.0192619437618052 | 618.00020765357 | 159.32308789477 | NA | NA | 0.0192631444799236 | 31468 | 0.000468474349951714 | 4617 | TRUE | 6.98410343975071e-14 |
| 36 | ZDHHC14 | rs9347482 | 2.8634e-43 | 31470 | 0.00846496133536056 | exposure | TRUE | reported | YRAE8b | textfile | 2 | 1 | TRUE | 0.00600788759609805 | 190.198900489053 | 159.32308789477 | NA | NA | 0.00600826714297757 | 31470 | 0.000320979474744684 | 4617 | TRUE | 0.000150472032973044 |
| 37 | ZDHHC14 | rs9355262 | 8.0444e-56 | 27794 | 0.00906843853439557 | exposure | TRUE | reported | YRAE8b | textfile | 2 | 1 | TRUE | 0.00883517831867809 | 247.73606817096 | 159.32308789477 | NA | NA | 0.0088358085081121 | 27794 | 0.000651119283545898 | 4617 | TRUE | 1.52522580934725e-05 |
| 38 | ZDHHC14 | rs9355793 | 6.0458e-11 | 25850 | 0.0152825722372761 | exposure | TRUE | reported | YRAE8b | textfile | 2 | 1 | TRUE | 0.00165313520095109 | 42.8009945048355 | 159.32308789477 | NA | NA | 0.00165326290151855 | 25850 | 0.000346224023440089 | 4617 | TRUE | 0.167230338030009 |
| 39 | ZDHHC14 | rs9365290 | 4.47e-08 | 31351 | 0.0111824436737985 | exposure | TRUE | reported | YRAE8b | textfile | 2 | 1 | TRUE | 0.000953927076169296 | 29.9332140141561 | 159.32308789477 | NA | NA | 0.000953987876644036 | 31351 | 0.000209991361602447 | 4617 | TRUE | 0.298173507622528 |
| 40 | ZDHHC14 | rs9456730 | 3.7359e-13 | 31130 | 0.00885590125366157 | exposure | TRUE | reported | YRAE8b | textfile | 2 | 1 | TRUE | 0.00169242199108902 | 52.7710225777219 | 159.32308789477 | NA | NA | 0.00169253054657059 | 31130 | 0.00123773167691343 | 4617 | TRUE | 0.705212416085898 |
| 41 | ZDHHC19 | rs111588574 | 1.3804e-13 | 25002 | 0.0148166101710192 | exposure | TRUE | reported | gcns9I | textfile | 2 | 1 | TRUE | 0.00218431852422865 | 54.7275054095671 | 105.156873208603 | NA | NA | 0.00218449288798032 | 25002 | 1.77855991112317e-05 | 4617 | TRUE | 0.00790956404558753 |
| 42 | ZDHHC19 | rs11185516 | 9.3015e-125 | 26609 | 0.00886649364125894 | exposure | TRUE | reported | gcns9I | textfile | 2 | 1 | TRUE | 0.0207699625048128 | 564.347876602253 | 105.156873208603 | NA | NA | 0.0207714913159834 | 26609 | 0.000342276305469358 | 4617 | TRUE | 2.01252979084914e-15 |
| 43 | ZDHHC19 | rs114234738 | 9.4561e-11 | 20593 | 0.0228216212822244 | exposure | TRUE | reported | gcns9I | textfile | 2 | 1 | TRUE | 0.002031905059376 | 41.9241429557931 | 105.156873208603 | NA | NA | 0.00203210201688374 | 20593 | 1.05169546248703e-05 | 4617 | TRUE | 0.0101585798025145 |
| 44 | ZDHHC19 | rs114665517 | 6.2324e-09 | 15783 | 0.0406901314950272 | exposure | TRUE | reported | gcns9I | textfile | 2 | 1 | TRUE | 0.00213441861502971 | 33.7553081217951 | 105.156873208603 | NA | NA | 0.00213468854244826 | 15783 | 4.88638580128451e-05 | 4617 | TRUE | 0.0190311945148718 |
| 45 | ZDHHC19 | rs115402043 | 5.3808e-11 | 24900 | 0.0293172120046189 | exposure | TRUE | reported | gcns9I | textfile | 2 | 1 | TRUE | 0.00172532781843955 | 43.0314553905612 | 105.156873208603 | NA | NA | 0.00172546617098382 | 24900 | 1.53755987074481e-05 | 4617 | TRUE | 0.0188502488754424 |
| 46 | ZDHHC19 | rs115761639 | 1.2507e-09 | 18441 | 0.0145884481750154 | exposure | TRUE | reported | gcns9I | textfile | 2 | 1 | TRUE | 0.00199629976344093 | 36.8834016641043 | 105.156873208603 | NA | NA | 0.00199651586128998 | 18441 | 8.99918082266529e-05 | 4617 | TRUE | 0.0323609478860345 |
| 47 | ZDHHC19 | rs12053980 | 6.3568e-45 | 26490 | 0.0123651007038664 | exposure | TRUE | reported | gcns9I | textfile | 2 | 1 | TRUE | 0.00741085340720461 | 197.764287191593 | 105.156873208603 | NA | NA | 0.00741140882313204 | 26490 | 0.00100359853949363 | 4617 | TRUE | 0.000618323326675293 |
| 48 | ZDHHC19 | rs13315991 | 3.2409e-19 | 22235 | 0.0121770534369368 | exposure | TRUE | reported | gcns9I | textfile | 2 | 1 | TRUE | 0.00359760640439332 | 80.2743788081857 | 105.156873208603 | NA | NA | 0.00359792886762117 | 22235 | 0.000883831143558372 | 4617 | TRUE | 0.0609294606297821 |
| 49 | ZDHHC19 | rs139902270 | 1.0997e-46 | 24016 | 0.0257479064986827 | exposure | TRUE | reported | gcns9I | textfile | 2 | 1 | TRUE | 0.00849879097128784 | 205.839352010912 | 105.156873208603 | NA | NA | 0.00849949277486565 | 24016 | 0.00049028487581991 | 4617 | TRUE | 1.21947177053554e-05 |
| 50 | ZDHHC19 | rs144713505 | 1.3731e-09 | 24309 | 0.0238540625579403 | exposure | TRUE | reported | gcns9I | textfile | 2 | 1 | TRUE | 0.00150777483746477 | 36.7048255866894 | 105.156873208603 | NA | NA | 0.00150789871135013 | 24309 | 1.26409380657169e-06 | 4617 | TRUE | 0.0188063145975044 |
| 51 | ZDHHC19 | rs1823236 | 2.1559e-08 | 23060 | 0.00931619019684225 | exposure | TRUE | reported | gcns9I | textfile | 2 | 1 | TRUE | 0.00135764781693197 | 31.3472018229392 | 105.156873208603 | NA | NA | 0.00135776541641585 | 23060 | 1.50160671160777e-05 | 4617 | TRUE | 0.0408038319155591 |
| 52 | ZDHHC19 | rs2035531 | 7.7693e-11 | 19546 | 0.010911087450403 | exposure | TRUE | reported | gcns9I | textfile | 2 | 1 | TRUE | 0.0021603502580326 | 42.313296985049 | 105.156873208603 | NA | NA | 0.00216057085593152 | 19546 | 0.000489704042975565 | 4617 | TRUE | 0.136308619495677 |
| 53 | ZDHHC19 | rs28651009 | 1.3993e-16 | 23175 | 0.0096978537571331 | exposure | TRUE | reported | gcns9I | textfile | 2 | 1 | TRUE | 0.00293884890777806 | 68.3026769876044 | 105.156873208603 | NA | NA | 0.00293910180652502 | 23175 | 0.000167663566767075 | 4617 | TRUE | 0.0103785006859195 |
| 54 | ZDHHC19 | rs3096343 | 1.5037e-10 | 26155 | 0.00876620188519734 | exposure | TRUE | reported | gcns9I | textfile | 2 | 1 | TRUE | 0.00156594248855221 | 41.0183262429791 | 105.156873208603 | NA | NA | 0.00156606205343008 | 26155 | 0.00160638483722536 | 4617 | FALSE | 0.974668591909711 |
| 55 | ZDHHC19 | rs35821144 | 1.5014e-08 | 22788 | 0.0100537472838707 | exposure | TRUE | reported | gcns9I | textfile | 2 | 1 | TRUE | 0.00140448058807105 | 32.047504778144 | 105.156873208603 | NA | NA | 0.0014046036906647 | 22788 | 4.54207836482272e-05 | 4617 | TRUE | 0.0567624268681176 |
| 56 | ZDHHC19 | rs3850642 | 7.5601e-49 | 25002 | 0.0162530743819221 | exposure | TRUE | reported | gcns9I | textfile | 2 | 1 | TRUE | 0.00855637014780405 | 215.755336213104 | 105.156873208603 | NA | NA | 0.00855704880003372 | 25002 | 0.000174737517987666 | 4617 | TRUE | 6.87841687244803e-07 |
| 57 | ZDHHC19 | rs4916521 | 5.5853e-101 | 26592 | 0.00956556189887019 | exposure | TRUE | reported | gcns9I | textfile | 2 | 1 | TRUE | 0.0168265553741199 | 455.075459821945 | 105.156873208603 | NA | NA | 0.0168277997066863 | 26592 | 0.000252837583933231 | 4617 | TRUE | 6.82033656142468e-13 |
| 58 | ZDHHC19 | rs55813550 | 1.5072e-24 | 22450 | 0.0103541596361024 | exposure | TRUE | reported | gcns9I | textfile | 2 | 1 | TRUE | 0.0046369000015828 | 104.574030557991 | 105.156873208603 | NA | NA | 0.00463731120946352 | 22450 | 1.92492628596799e-06 | 4617 | TRUE | 3.57158861196184e-05 |
| 59 | ZDHHC19 | rs62409175 | 8.9561e-09 | 26156 | 0.0115439669374945 | exposure | TRUE | reported | gcns9I | textfile | 2 | 1 | TRUE | 0.00126210368357194 | 33.0507732427953 | 105.156873208603 | NA | NA | 0.00126220007499629 | 26156 | 9.69935621157255e-05 | 4617 | TRUE | 0.10759585087599 |
| 60 | ZDHHC19 | rs62410505 | 6.8968e-27 | 21541 | 0.0257026698548865 | exposure | TRUE | reported | gcns9I | textfile | 2 | 1 | TRUE | 0.00532212928127052 | 115.246700428204 | 105.156873208603 | NA | NA | 0.00532262083627354 | 21541 | 0.00104224256863165 | 4617 | TRUE | 0.0119194899657124 |
| 61 | ZDHHC19 | rs67751943 | 2.432e-16 | 13595 | 0.0121721072883327 | exposure | TRUE | reported | gcns9I | textfile | 2 | 1 | TRUE | 0.00491968312955199 | 67.2038745478538 | 105.156873208603 | NA | NA | 0.00492040342327727 | 13595 | 9.31216473791839e-06 | 4617 | TRUE | 7.99328483850181e-05 |
| 62 | ZDHHC19 | rs6787075 | 3.5518e-08 | 25801 | 0.020070444861365 | exposure | TRUE | reported | gcns9I | textfile | 2 | 1 | TRUE | 0.00117612920350876 | 30.3786865817757 | 105.156873208603 | NA | NA | 0.00117622027260574 | 25801 | 7.98650925119496e-05 | 4617 | TRUE | 0.112432655598344 |
| 63 | ZDHHC19 | rs7374260 | 5.2534e-31 | 26609 | 0.00869489797794265 | exposure | TRUE | reported | gcns9I | textfile | 2 | 1 | TRUE | 0.00501364044623798 | 134.070110682604 | 105.156873208603 | NA | NA | 0.00501401542289643 | 26609 | 2.60793715074637e-05 | 4617 | TRUE | 3.66829440763445e-05 |
| 64 | ZDHHC19 | rs75792959 | 5.203e-21 | 20047 | 0.028847686020206 | exposure | TRUE | reported | gcns9I | textfile | 2 | 1 | TRUE | 0.00439285611156802 | 88.4433195331194 | 105.156873208603 | NA | NA | 0.00439329248542782 | 20047 | 0.00210921381288851 | 4617 | TRUE | 0.211075281328317 |
| 65 | ZDHHC19 | rs7622459 | 9.9465e-28 | 25002 | 0.00916353668588832 | exposure | TRUE | reported | gcns9I | textfile | 2 | 1 | TRUE | 0.00474103906022507 | 119.090589642829 | 105.156873208603 | NA | NA | 0.0047414165450106 | 25002 | 1.07510252489191e-06 | 4617 | TRUE | 2.23947704949307e-05 |
| 66 | ZDHHC19 | rs7623111 | 1.3192e-30 | 26486 | 0.00882896123861409 | exposure | TRUE | reported | gcns9I | textfile | 2 | 1 | TRUE | 0.00496822378982953 | 132.235413979436 | 105.156873208603 | NA | NA | 0.00496859711249132 | 26486 | 0.000281386794319732 | 4617 | TRUE | 0.0007400904288944 |
| 67 | ZDHHC19 | rs78180666 | 4.2755e-19 | 26165 | 0.0167783218366646 | exposure | TRUE | reported | gcns9I | textfile | 2 | 1 | TRUE | 0.00303823787080076 | 79.7316611662172 | 105.156873208603 | NA | NA | 0.0030384694196505 | 26165 | 0.000627473096708372 | 4617 | TRUE | 0.0592170248576893 |
| 68 | ZDHHC19 | rs79051088 | 1.3442e-11 | 21876 | 0.0212356441677717 | exposure | TRUE | reported | gcns9I | textfile | 2 | 1 | TRUE | 0.00208686088564152 | 45.7434552400372 | 105.156873208603 | NA | NA | 0.00208705129484879 | 21876 | 8.2166618983029e-05 | 4617 | TRUE | 0.0236739942901794 |
| 69 | ZDHHC19 | rs939892 | 1.5972e-13 | 26494 | 0.0125038346813583 | exposure | TRUE | reported | gcns9I | textfile | 2 | 1 | TRUE | 0.00205089822467858 | 54.4440549838956 | 105.156873208603 | NA | NA | 0.00205105273862424 | 26494 | 8.70668263990036e-06 | 4617 | TRUE | 0.00790860826978296 |
| 70 | ZDHHC19 | rs9823320 | 8.2143e-09 | 22885 | 0.0182930920566436 | exposure | TRUE | reported | gcns9I | textfile | 2 | 1 | TRUE | 0.00144966278541905 | 33.2207924652831 | 105.156873208603 | NA | NA | 0.00144978930388951 | 22885 | 1.25156549500022e-06 | 4617 | TRUE | 0.0219502066550917 |
| 71 | ZDHHC19 | rs9842342 | 1.2912e-10 | 25827 | 0.0110090038603959 | exposure | TRUE | reported | gcns9I | textfile | 2 | 1 | TRUE | 0.00159733870850034 | 41.3172698214367 | 105.156873208603 | NA | NA | 0.0015974622157236 | 25827 | 2.38261924012645e-05 | 4617 | TRUE | 0.0280484550448573 |
| 72 | ZDHHC20 | rs112506767 | 2.2358e-10 | 17403 | 0.0315267047583778 | exposure | TRUE | reported | R9SlkW | textfile | 2 | 1 | TRUE | 0.00230734584074251 | 40.2429794460043 | 104.855875704671 | NA | NA | 0.00230761042569573 | 17403 | 3.09785295706708e-06 | 4617 | TRUE | 0.00515911944746187 |
| 73 | ZDHHC20 | rs113842275 | 8.6335e-09 | 29863 | 0.019078338190117 | exposure | TRUE | reported | R9SlkW | textfile | 2 | 1 | TRUE | 0.00110806765826415 | 33.1247127663313 | 104.855875704671 | NA | NA | 0.0011081417910636 | 29863 | 0.000147860276612436 | 4617 | TRUE | 0.181397957959036 |
| 74 | ZDHHC20 | rs116975298 | 2.104e-16 | 23539 | 0.030984049070756 | exposure | TRUE | reported | R9SlkW | textfile | 2 | 1 | TRUE | 0.00285942473106754 | 67.495277561025 | 104.855875704671 | NA | NA | 0.00285966700898983 | 23539 | 0.000282817989058959 | 4617 | TRUE | 0.0226097353232603 |
| 75 | ZDHHC20 | rs117322839 | 5.0654e-11 | 24774 | 0.0319497172198088 | exposure | TRUE | reported | R9SlkW | textfile | 2 | 1 | TRUE | 0.00173884065911659 | 43.1495910710148 | 104.855875704671 | NA | NA | 0.0017389808025728 | 24774 | 0.000127595972422589 | 4617 | TRUE | 0.0577313664301746 |
| 76 | ZDHHC20 | rs12583648 | 6.1052e-16 | 30688 | 0.00841500332187732 | exposure | TRUE | reported | R9SlkW | textfile | 2 | 1 | TRUE | 0.0021265801477741 | 65.395306775743 | 104.855875704671 | NA | NA | 0.00212671845563505 | 30688 | 0.000249512911741943 | 4617 | TRUE | 0.0545769573642482 |
| 77 | ZDHHC20 | rs148153530 | 1.9631e-10 | 20757 | 0.0412332540377297 | exposure | TRUE | reported | R9SlkW | textfile | 2 | 1 | TRUE | 0.00194737324361596 | 40.496593654189 | 104.855875704671 | NA | NA | 0.00194756053155779 | 20757 | 8.18038828676345e-05 | 4617 | TRUE | 0.030970901869243 |
| 78 | ZDHHC20 | rs2181329 | 1.7924e-61 | 30688 | 0.0102151162337007 | exposure | TRUE | reported | R9SlkW | textfile | 2 | 1 | TRUE | 0.00883923251698527 | 273.659630117329 | 104.855875704671 | NA | NA | 0.00883980353278649 | 30688 | 0.00107277995854555 | 4617 | TRUE | 9.73795653897839e-05 |
| 79 | ZDHHC20 | rs261392 | 1.0694e-10 | 30688 | 0.0085683658962074 | exposure | TRUE | reported | R9SlkW | textfile | 2 | 1 | TRUE | 0.00135676100652456 | 41.6901317913841 | 104.855875704671 | NA | NA | 0.00135684931520515 | 30688 | 0.000291331479332493 | 4617 | TRUE | 0.210268560849496 |
| 80 | ZDHHC20 | rs41284199 | 2.4389e-10 | 29760 | 0.0310655579129406 | exposure | TRUE | reported | R9SlkW | textfile | 2 | 1 | TRUE | 0.00134497271193528 | 40.0776012418001 | 104.855875704671 | NA | NA | 0.00134506298437556 | 29760 | 0.000548066983697813 | 4617 | TRUE | 0.401407265749447 |
| 81 | ZDHHC20 | rs4770150 | 3.6226e-21 | 27605 | 0.0128176011335157 | exposure | TRUE | reported | R9SlkW | textfile | 2 | 1 | TRUE | 0.00321995615957021 | 89.1675655244609 | 104.855875704671 | NA | NA | 0.00322018871308201 | 27605 | 5.63438633862063e-05 | 4617 | TRUE | 0.00193659217680911 |
| 82 | ZDHHC20 | rs73158463 | 4.9194e-08 | 24202 | 0.0265283675392606 | exposure | TRUE | reported | R9SlkW | textfile | 2 | 1 | TRUE | 0.00122765791698559 | 29.745839306173 | 104.855875704671 | NA | NA | 0.00122775925174994 | 24202 | 0.000211942450661177 | 4617 | TRUE | 0.202028877432089 |
| 83 | ZDHHC20 | rs74039340 | 4.9806e-15 | 30688 | 0.0110416138277599 | exposure | TRUE | reported | R9SlkW | textfile | 2 | 1 | TRUE | 0.0019924580978335 | 61.262632418175 | 104.855875704671 | NA | NA | 0.00199258770012447 | 30688 | 0.00222319892515325 | 4617 | FALSE | 0.873314102754503 |
| 84 | ZDHHC20 | rs75615472 | 1.067e-21 | 31346 | 0.0114546666472145 | exposure | TRUE | reported | R9SlkW | textfile | 2 | 1 | TRUE | 0.0029134116266332 | 91.5847982412098 | 104.855875704671 | NA | NA | 0.0029135969841574 | 31346 | 0.000423682337159202 | 4617 | TRUE | 0.0339249283262492 |
| 85 | ZDHHC20 | rs77107022 | 1.069e-08 | 28344 | 0.0259835571864612 | exposure | TRUE | reported | R9SlkW | textfile | 2 | 1 | TRUE | 0.00115271967883411 | 32.7080843900499 | 104.855875704671 | NA | NA | 0.00115280092862753 | 28344 | 0.000145120120739042 | 4617 | TRUE | 0.167367845299436 |
| 86 | ZDHHC20 | rs79745409 | 2.2733e-08 | 13506 | 0.0466420934241804 | exposure | TRUE | reported | R9SlkW | textfile | 2 | 1 | TRUE | 0.0023080580041241 | 31.2401192950807 | 104.855875704671 | NA | NA | 0.00230839904827179 | 13506 | 0.000103413673565983 | 4617 | TRUE | 0.0261944060564067 |
| 87 | ZDHHC20 | rs7981970 | 5.787e-176 | 31354 | 0.00807723256522095 | exposure | TRUE | reported | R9SlkW | textfile | 2 | 1 | TRUE | 0.0248758528631322 | 799.80353399602 | 104.855875704671 | NA | NA | 0.0248774002608303 | 31354 | 0.00166998667113388 | 4617 | TRUE | 6.67998330805104e-14 |
| 88 | ZDHHC20 | rs9506713 | 1.358e-08 | 30192 | 0.00994280331739578 | exposure | TRUE | reported | R9SlkW | textfile | 2 | 1 | TRUE | 0.00106694578739669 | 32.2454975192468 | 104.855875704671 | NA | NA | 0.00106701639404384 | 30192 | 7.47077729514853e-06 | 4617 | TRUE | 0.0581796810810975 |
| 89 | ZDHHC20 | rs9509831 | 1.0665e-08 | 29863 | 0.00842498201024269 | exposure | TRUE | reported | R9SlkW | textfile | 2 | 1 | TRUE | 0.00109437936309833 | 32.7150648533171 | 104.855875704671 | NA | NA | 0.00109445258111626 | 29863 | 7.31597412686371e-05 | 4617 | TRUE | 0.120799937983996 |
| 90 | ZDHHC20 | rs9550727 | 3.9265e-37 | 30688 | 0.00807593895218662 | exposure | TRUE | reported | R9SlkW | textfile | 2 | 1 | TRUE | 0.00525456332091467 | 162.093259360792 | 104.855875704671 | NA | NA | 0.00525490399425725 | 30688 | 0.000883737508511079 | 4617 | TRUE | 0.00661233794114579 |

Supplementary Table S2A & S2B. Instrumental variables (IVs) for MR analysis of palmitoylation gene expression on acne. SNPs were selected from eQTLGen cis-eQTL data (P < 5×10⁻⁸, F > 10, LD-clumped).
S2A provides harmonized SNP-level data (effect/other alleles, betas, SEs, allele frequencies, positions, outcome statistics, and QC flags such as palindromic/ambiguous markers).
S2B reports instrument strength metrics (eQTL p-values, SEs, sample sizes, R², F-statistics, mean F, and Steiger tests for causal directionality)..

Supplementary Table S3: Variant-Level MR Effects of Palmitoylation-Related Genes on Acne Risk

| gene | id.exposure | id.outcome | samplesize | SNP | b | se | p | lo_ci | up_ci | or | or_lci95 | or_uci95 |
| --- | --- | --- | --- | --- | --- | --- | --- | --- | --- | --- | --- | --- |
| ZDHHC14 | YRAE8b | SdAemx | 4617 | rs111591466 | -0.604861307 | 0.394049303768091 | 0.124786554698142 | -1.377197943 | 0.167475328169449 | 0.546150168474508 | 0.252284479166522 | 1.18231611992211 |
| ZDHHC14 | YRAE8b | SdAemx | 4617 | rs111883538 | -0.355995934 | 0.474377986167244 | 0.452985028545629 | -1.285776787 | 0.573784918822484 | 0.700475468316965 | 0.27643576851163 | 1.77497248042715 |
| ZDHHC14 | YRAE8b | SdAemx | 4617 | rs113570533 | -0.09486129 | 0.523083507403379 | 0.856092718014814 | -1.120104965 | 0.930382384299625 | 0.909499082144853 | 0.326245548552573 | 2.53547851945337 |
| ZDHHC14 | YRAE8b | SdAemx | 4617 | rs113738669 | 0.169925728676085 | 0.229922449901459 | 0.459872564069632 | -0.280722273 | 0.620573730482945 | 1.18521682042894 | 0.755238056257197 | 1.85999487153664 |
| ZDHHC14 | YRAE8b | SdAemx | 4617 | rs113959985 | -0.642291415 | 0.432850526002141 | 0.137844941832644 | -1.490678445 | 0.206095616444762 | 0.526085561765542 | 0.225219804335621 | 1.22887069862529 |
| ZDHHC14 | YRAE8b | SdAemx | 4617 | rs11752028 | 0.493108521904383 | 0.354516953597925 | 0.16424643587886 | -0.201744707 | 1.18796175095631 | 1.63739820531917 | 0.817303553066232 | 3.28038814064127 |
| ZDHHC14 | YRAE8b | SdAemx | 4617 | rs139523204 | -0.357796213 | 0.291590635800578 | 0.219803897573466 | -0.929313859 | 0.213721433128436 | 0.699215551499744 | 0.394824522663255 | 1.23827766360925 |
| ZDHHC14 | YRAE8b | SdAemx | 4617 | rs143370621 | -0.042742151 | 0.198459683059208 | 0.82947929169117 | -0.43172313 | 0.346238827332134 | 0.958158417963182 | 0.649389148001971 | 1.41374021530603 |
| ZDHHC14 | YRAE8b | SdAemx | 4617 | rs145957750 | -0.028857084 | 0.238178127936022 | 0.903566227828227 | -0.495686215 | 0.437972046680954 | 0.971555305271541 | 0.609152754188692 | 1.54956159142455 |
| ZDHHC14 | YRAE8b | SdAemx | 4617 | rs1474922 | 0.223802173877262 | 0.435081859420161 | 0.606978680643397 | -0.628958271 | 1.07656261834078 | 1.25082354937815 | 0.533146906636257 | 2.9345749402357 |
| ZDHHC14 | YRAE8b | SdAemx | 4617 | rs150599380 | 0.124621507472816 | 0.200172118821413 | 0.533565976440848 | -0.267715845 | 0.516958860362784 | 1.1327196460004 | 0.765125164038035 | 1.67692013900552 |
| ZDHHC14 | YRAE8b | SdAemx | 4617 | rs17165322 | 0.0370842031756057 | 0.234266389442623 | 0.874220967398729 | -0.42207792 | 0.496246326483147 | 1.03778040156463 | 0.655682946501186 | 1.64254411010474 |
| ZDHHC14 | YRAE8b | SdAemx | 4617 | rs186957490 | -0.054191424 | 0.215420003969412 | 0.801379860780142 | -0.476414632 | 0.368031784007602 | 0.947250762831135 | 0.62100594020153 | 1.44488796257404 |
| ZDHHC14 | YRAE8b | SdAemx | 4617 | rs2038586 | -0.02524676 | 0.207590516664079 | 0.903201495423466 | -0.432124172 | 0.381630652968376 | 0.975069274544684 | 0.649128767832876 | 1.4646710133264 |
| ZDHHC14 | YRAE8b | SdAemx | 4617 | rs2135213 | -0.054390603 | 0.0917756245006822 | 0.553417021107343 | -0.234270827 | 0.12548962108318 | 0.947062109003053 | 0.791147522800608 | 1.13370340228615 |
| ZDHHC14 | YRAE8b | SdAemx | 4617 | rs2749677 | -0.186662711 | 0.249834494498041 | 0.454975754148999 | -0.676338321 | 0.303012897749594 | 0.829723545432354 | 0.508475461811367 | 1.35393192700464 |
| ZDHHC14 | YRAE8b | SdAemx | 4617 | rs34410217 | 0.08135497870779 | 0.154079590356357 | 0.59749503404569 | -0.220641018 | 0.383350975806249 | 1.0847558934752 | 0.802004533498226 | 1.46719288891872 |
| ZDHHC14 | YRAE8b | SdAemx | 4617 | rs34718793 | -0.085968481 | 0.18704628502566 | 0.645795651665304 | -0.452579199 | 0.280642237927295 | 0.917623153582703 | 0.635985700507661 | 1.32397984941946 |
| ZDHHC14 | YRAE8b | SdAemx | 4617 | rs34781565 | -0.224916585 | 0.144376096709901 | 0.119268345661186 | -0.507893735 | 0.0580605644540062 | 0.798582829690123 | 0.601761714784542 | 1.05977917871399 |
| ZDHHC14 | YRAE8b | SdAemx | 4617 | rs35057821 | 0.0635297539312783 | 0.181587640514717 | 0.726445825711941 | -0.292382021 | 0.419441529340123 | 1.06559119085685 | 0.746483308838759 | 1.52111182204208 |
| ZDHHC14 | YRAE8b | SdAemx | 4617 | rs35795521 | -0.105028371 | 0.086965924510864 | 0.227164342304615 | -0.275481583 | 0.065424841148823 | 0.900298979938382 | 0.759206414320112 | 1.0676124937695 |
| ZDHHC14 | YRAE8b | SdAemx | 4617 | rs4349837 | 0.0974882950777383 | 0.23009097768286 | 0.671788584538235 | -0.353490021 | 0.548466611336144 | 1.10239853799862 | 0.702233000009341 | 1.73059730397935 |
| ZDHHC14 | YRAE8b | SdAemx | 4617 | rs62423255 | -0.272665492 | 0.341179548125829 | 0.424183293679184 | -0.941377406 | 0.396046422701922 | 0.761347422127086 | 0.390090152642041 | 1.48593829722091 |
| ZDHHC14 | YRAE8b | SdAemx | 4617 | rs62425059 | 0.583063928402712 | 0.410435050344202 | 0.15543315228724 | -0.22138877 | 1.38751662707735 | 1.79151911655327 | 0.801405057257203 | 4.00489205291567 |
| ZDHHC14 | YRAE8b | SdAemx | 4617 | rs636169 | -0.777041188 | 0.344568683994728 | 0.0241262606987239 | -1.452395808 | -0.101686567 | 0.459764357173157 | 0.234008975295317 | 0.903312635167445 |
| ZDHHC14 | YRAE8b | SdAemx | 4617 | rs6605508 | -0.308373198 | 0.348820493888752 | 0.376671635562174 | -0.992061366 | 0.375314969782567 | 0.734641100078296 | 0.37081152428307 | 1.45544976512719 |
| ZDHHC14 | YRAE8b | SdAemx | 4617 | rs681502 | -0.188392186 | 0.123237367658233 | 0.126340397452563 | -0.429937427 | 0.0531530543656606 | 0.828289799658838 | 0.650549800397004 | 1.0545910425308 |
| ZDHHC14 | YRAE8b | SdAemx | 4617 | rs733207 | -0.117092314 | 0.229140272127632 | 0.609346059180008 | -0.566207248 | 0.33202261891009 | 0.889503075377008 | 0.567674409214446 | 1.39378437403942 |
| ZDHHC14 | YRAE8b | SdAemx | 4617 | rs749547 | -0.20355643 | 0.166294294746711 | 0.220924522765305 | -0.529493248 | 0.12238038754777 | 0.815824165938934 | 0.588903322095723 | 1.13018392791775 |
| ZDHHC14 | YRAE8b | SdAemx | 4617 | rs77040881 | 0.333454428673813 | 0.196539249017722 | 0.0897665933294684 | -0.051762499 | 0.718671356748549 | 1.39578143748098 | 0.949554359793782 | 2.05170541435835 |
| ZDHHC14 | YRAE8b | SdAemx | 4617 | rs77125844 | 1.86450125744728 | 0.631415718537766 | 0.003148139664068 | 0.626926449113262 | 3.10207606578131 | 6.45271683885189 | 1.87184850715048 | 22.2440835587639 |
| ZDHHC14 | YRAE8b | SdAemx | 4617 | rs79464071 | -0.1274217 | 0.298991178027927 | 0.669982441191657 | -0.713444409 | 0.45860100879063 | 0.880362345380376 | 0.489953686800149 | 1.58185942884796 |
| ZDHHC14 | YRAE8b | SdAemx | 4617 | rs844134 | 0.411639033940407 | 0.317488141471307 | 0.19478629979973 | -0.210637723 | 1.03391579122417 | 1.50928953569286 | 0.810067482268428 | 2.81205572673158 |
| ZDHHC14 | YRAE8b | SdAemx | 4617 | rs928008 | 0.49861027930022 | 0.489487551354175 | 0.308375187767351 | -0.460785321 | 1.4580058799544 | 1.64643159999197 | 0.630788079594418 | 4.29738148380205 |
| ZDHHC14 | YRAE8b | SdAemx | 4617 | rs9295141 | -0.146982797 | 0.0999392288634632 | 0.14136638356194 | -0.342863685 | 0.0488980916964819 | 0.863308828897488 | 0.709734952168318 | 1.05011333001901 |
| ZDHHC14 | YRAE8b | SdAemx | 4617 | rs9347482 | -0.227768427 | 0.187111003558596 | 0.223493748044497 | -0.594505994 | 0.138969139831769 | 0.796308641952891 | 0.551835108332948 | 1.14908863838774 |
| ZDHHC14 | YRAE8b | SdAemx | 4617 | rs9355262 | -0.265222472 | 0.152951151824295 | 0.0829120806658649 | -0.565006729 | 0.0345617858343092 | 0.767035287316736 | 0.568356322094853 | 1.03516598499432 |
| ZDHHC14 | YRAE8b | SdAemx | 4617 | rs9355793 | -0.398376861 | 0.315104393459674 | 0.20613332763565 | -1.015981472 | 0.219227750155178 | 0.671408952111437 | 0.362046916411763 | 1.2451148194912 |
| ZDHHC14 | YRAE8b | SdAemx | 4617 | rs9365290 | 0.56873448590455 | 0.57766677804076 | 0.324851404450059 | -0.563492399 | 1.70096137086444 | 1.76603069992127 | 0.569217653278104 | 5.47921241567789 |
| ZDHHC14 | YRAE8b | SdAemx | 4617 | rs9456730 | 0.831318084214952 | 0.347615542279398 | 0.0167802737553205 | 0.149991621347331 | 1.51264454708257 | 2.29634352051521 | 1.16182450816349 | 4.53871779013131 |
| ZDHHC14 | YRAE8b | SdAemx | 4617 | All - Inverse variance weighted | -0.071949478 | 0.0361054165517817 | 0.0462875862743902 | -0.142716095 | -0.001182862 | 0.930577908820922 | 0.867000179699643 | 0.998817837252954 |
| ZDHHC14 | YRAE8b | SdAemx | 4617 | All - MR Egger | -0.117927969 | 0.0799690445075356 | 0.148538771626688 | -0.274667296 | 0.0388113583274998 | 0.888760068667938 | 0.759824877844651 | 1.03957435810641 |
| ZDHHC19 | gcns9I | 2rKQmZ | 4617 | rs111588574 | -0.131375551 | 0.458554106221635 | 0.77449552788792 | -1.030141599 | 0.767390497008654 | 0.876888396068791 | 0.356956412183715 | 2.15413768436341 |
| ZDHHC19 | gcns9I | 2rKQmZ | 4617 | rs11185516 | -0.131629543 | 0.104714004095435 | 0.208739665165761 | -0.336868991 | 0.0736099048184535 | 0.876665701693754 | 0.714002374344474 | 1.07638683027042 |
| ZDHHC19 | gcns9I | 2rKQmZ | 4617 | rs114234738 | -0.07795929 | 0.35386266247353 | 0.825630156880506 | -0.771530109 | 0.615611528065478 | 0.925002082257884 | 0.462305149661053 | 1.85078806240584 |
| ZDHHC19 | gcns9I | 2rKQmZ | 4617 | rs114665517 | -0.335262553 | 0.705983753854808 | 0.634867471610623 | -1.71899071 | 1.04846560483063 | 0.715150297042216 | 0.179246968768708 | 2.8532697142539 |
| ZDHHC19 | gcns9I | 2rKQmZ | 4617 | rs115402043 | -0.107087607 | 0.402007359079555 | 0.789944868716158 | -0.89502203 | 0.680846817104354 | 0.898446959576763 | 0.408598596915411 | 1.9755499535889 |
| ZDHHC19 | gcns9I | 2rKQmZ | 4617 | rs115761639 | -0.220906891 | 0.342769664337324 | 0.51926668572354 | -0.892735433 | 0.450921651178597 | 0.801791330865937 | 0.409533966430054 | 1.56975828856327 |
| ZDHHC19 | gcns9I | 2rKQmZ | 4617 | rs12053980 | -0.362344924 | 0.168282238609866 | 0.0313031467681748 | -0.692178112 | -0.032511736 | 0.696042244767339 | 0.500484769299354 | 0.968011088886859 |
| ZDHHC19 | gcns9I | 2rKQmZ | 4617 | rs13315991 | -0.547250213 | 0.270846626104267 | 0.0433297883069508 | -1.0781096 | -0.016390826 | 0.57853848261798 | 0.340238104082846 | 0.983742772644934 |
| ZDHHC19 | gcns9I | 2rKQmZ | 4617 | rs139902270 | -0.329632756 | 0.219085568148293 | 0.132430926999705 | -0.759040469 | 0.0997749578300784 | 0.719187802531955 | 0.468115382657648 | 1.10492223599714 |
| ZDHHC19 | gcns9I | 2rKQmZ | 4617 | rs144713505 | -0.031353207 | 0.410493413436419 | 0.939117322995109 | -0.835920297 | 0.773213883175692 | 0.969133207828959 | 0.433475371512652 | 2.16671865633186 |
| ZDHHC19 | gcns9I | 2rKQmZ | 4617 | rs1823236 | -0.107992594 | 0.410229379967881 | 0.792358439750011 | -0.912042179 | 0.696056990420984 | 0.897634244001322 | 0.40170303628655 | 2.00582809493393 |
| ZDHHC19 | gcns9I | 2rKQmZ | 4617 | rs2035531 | -0.490242115 | 0.326025489540468 | 0.132660536458953 | -1.129252074 | 0.148767844696446 | 0.612478086220256 | 0.323274951669755 | 1.16040356409439 |
| ZDHHC19 | gcns9I | 2rKQmZ | 4617 | rs28651009 | -0.24687533 | 0.280631281898881 | 0.379014142149723 | -0.796912643 | 0.303161982283907 | 0.781238084226517 | 0.450718346804605 | 1.35413379236259 |
| ZDHHC19 | gcns9I | 2rKQmZ | 4617 | rs3096343 | -1.045147304 | 0.383546259380699 | 0.00643097400182713 | -1.796897973 | -0.293396636 | 0.351640017414706 | 0.165812445982126 | 0.745726300067632 |
| ZDHHC19 | gcns9I | 2rKQmZ | 4617 | rs35821144 | -0.190968368 | 0.417098290875976 | 0.64706035575737 | -1.008481019 | 0.62654428170872 | 0.826158720453302 | 0.364772641849214 | 1.87113328434093 |
| ZDHHC19 | gcns9I | 2rKQmZ | 4617 | rs3850642 | 0.184633239382423 | 0.20558574988289 | 0.36914085451269 | -0.21831483 | 0.587581309152887 | 1.20277722790409 | 0.803872318389266 | 1.79963039760267 |
| ZDHHC19 | gcns9I | 2rKQmZ | 4617 | rs4916521 | -0.124170729 | 0.114936416384637 | 0.27998956104101 | -0.349446105 | 0.101104647207765 | 0.883229035282629 | 0.705078521033055 | 1.10639241658265 |
| ZDHHC19 | gcns9I | 2rKQmZ | 4617 | rs55813550 | 0.0206646940325721 | 0.219248008469286 | 0.924908504882682 | -0.409061403 | 0.450390790632373 | 1.02087968719117 | 0.664273442975204 | 1.56892518697071 |
| ZDHHC19 | gcns9I | 2rKQmZ | 4617 | rs62409175 | 0.274950909791257 | 0.410938461708389 | 0.503444130840577 | -0.530488475 | 1.0803902947397 | 1.31646604768827 | 0.588317520984759 | 2.94582906831508 |
| ZDHHC19 | gcns9I | 2rKQmZ | 4617 | rs62410505 | -0.527033678 | 0.240182672706118 | 0.0282135985243412 | -0.997791716 | -0.056275639 | 0.590353553912882 | 0.368692721049294 | 0.94527854421887 |
| ZDHHC19 | gcns9I | 2rKQmZ | 4617 | rs67751943 | -0.044992973 | 0.217035859125037 | 0.835770393569183 | -0.470383257 | 0.380397310490857 | 0.956004199274136 | 0.624762777510032 | 1.46286568587244 |
| ZDHHC19 | gcns9I | 2rKQmZ | 4617 | rs6787075 | 0.262274919489302 | 0.431991366124729 | 0.543764640269043 | -0.584428158 | 1.10897799709377 | 1.29988385671684 | 0.557424529383293 | 3.03125885547672 |
| ZDHHC19 | gcns9I | 2rKQmZ | 4617 | rs7374260 | -0.075789898 | 0.218459656411285 | 0.728644976150683 | -0.503970825 | 0.352391028562718 | 0.927010952952448 | 0.604127008264281 | 1.42246463928637 |
| ZDHHC19 | gcns9I | 2rKQmZ | 4617 | rs75792959 | -0.675420252 | 0.216256629006538 | 0.00178874921323995 | -1.099283245 | -0.251557259 | 0.508942491413645 | 0.333109756190427 | 0.777588932034324 |
| ZDHHC19 | gcns9I | 2rKQmZ | 4617 | rs7622459 | -0.015439117 | 0.219185301238689 | 0.943844528967476 | -0.445042307 | 0.41416407359549 | 0.984679455331153 | 0.640797165086447 | 1.51310536715694 |
| ZDHHC19 | gcns9I | 2rKQmZ | 4617 | rs7623111 | -0.244114897 | 0.214188161419038 | 0.254402261057957 | -0.663923693 | 0.17569389960481 | 0.783397619230573 | 0.514827341806745 | 1.19207310874818 |
| ZDHHC19 | gcns9I | 2rKQmZ | 4617 | rs78180666 | -0.381796064 | 0.224290945962101 | 0.0887111856393157 | -0.821406318 | 0.0578141899144206 | 0.682634252593039 | 0.439812702752885 | 1.05951810826865 |
| ZDHHC19 | gcns9I | 2rKQmZ | 4617 | rs79051088 | 0.206585564686372 | 0.335466044178248 | 0.538015558460713 | -0.450927882 | 0.864099011275738 | 1.2294729291821 | 0.637036782401872 | 2.37286719597617 |
| ZDHHC19 | gcns9I | 2rKQmZ | 4617 | rs939892 | 0.0680446638555328 | 0.339453250998049 | 0.841125756531103 | -0.597283708 | 0.733373035811708 | 1.07041311618791 | 0.550304395162276 | 2.08209174664004 |
| ZDHHC19 | gcns9I | 2rKQmZ | 4617 | rs9823320 | -0.029196791 | 0.384168900251426 | 0.939419192473884 | -0.782167835 | 0.72377425359661 | 0.971225317358616 | 0.457413338895341 | 2.06220181369519 |
| ZDHHC19 | gcns9I | 2rKQmZ | 4617 | rs9842342 | -0.123545053 | 0.372569252655924 | 0.740189112889557 | -0.853780788 | 0.606690682381553 | 0.883781823480134 | 0.425802017655137 | 1.8343508934391 |
| ZDHHC19 | gcns9I | 2rKQmZ | 4617 | All - Inverse variance weighted | -0.18395803 | 0.0429011037577463 | 1.80325098492185e-05 | -0.268044193 | -0.099871866 | 0.831970721290793 | 0.764873978355503 | 0.904953365747015 |
| ZDHHC19 | gcns9I | 2rKQmZ | 4617 | All - MR Egger | -0.19530396 | 0.0968222826536726 | 0.0530220116216989 | -0.385075634 | -0.005532286 | 0.822584586937207 | 0.680399172695246 | 0.994482988546677 |
| ZDHHC20 | R9SlkW | yaBhmT | 4617 | rs112506767 | 0.0316851426627293 | 0.264995648040077 | 0.90482494257124 | -0.487706327 | 0.551076612821281 | 1.03219246076673 | 0.614033171226254 | 1.73512006515214 |
| ZDHHC20 | R9SlkW | yaBhmT | 4617 | rs113842275 | 0.409919985747556 | 0.49619841570593 | 0.408735394070302 | -0.562628909 | 1.38246888053118 | 1.50669722303761 | 0.56970937931021 | 3.98472730896213 |
| ZDHHC20 | R9SlkW | yaBhmT | 4617 | rs116975298 | -0.223758981 | 0.195830208818589 | 0.253197525867666 | -0.607586191 | 0.160068227813463 | 0.799507807345227 | 0.544663998609859 | 1.17359093980404 |
| ZDHHC20 | R9SlkW | yaBhmT | 4617 | rs117322839 | -0.247414144 | 0.322398103237963 | 0.442832963550848 | -0.879314426 | 0.384486138800104 | 0.780817256133774 | 0.415067373604699 | 1.46885933765759 |
| ZDHHC20 | R9SlkW | yaBhmT | 4617 | rs12583648 | -0.349358637 | 0.32552543753169 | 0.283174863155355 | -0.987388494 | 0.288671221046432 | 0.705140195893992 | 0.372548333924587 | 1.33465285061795 |
| ZDHHC20 | R9SlkW | yaBhmT | 4617 | rs148153530 | -0.245989812 | 0.400337750284911 | 0.538914239587037 | -1.030651802 | 0.538672178719137 | 0.78193019131535 | 0.356774338396328 | 1.71372982383968 |
| ZDHHC20 | R9SlkW | yaBhmT | 4617 | rs2181329 | -0.367879984 | 0.165246360909543 | 0.0259973299678192 | -0.691762851 | -0.043997117 | 0.69220025186534 | 0.500692643942211 | 0.956956716819156 |
| ZDHHC20 | R9SlkW | yaBhmT | 4617 | rs261392 | 0.471364800377015 | 0.406456728477959 | 0.246174044088652 | -0.325290387 | 1.26801998819381 | 1.60217935671228 | 0.722317571234236 | 3.55380900770381 |
| ZDHHC20 | R9SlkW | yaBhmT | 4617 | rs41284199 | -0.606972162 | 0.381546133263137 | 0.111649534523216 | -1.354802583 | 0.140858258979338 | 0.544998540547807 | 0.2579982225534 | 1.15126145544574 |
| ZDHHC20 | R9SlkW | yaBhmT | 4617 | rs4770150 | 0.131886230423973 | 0.258629497667237 | 0.610091589350128 | -0.375027585 | 0.638800045851756 | 1.14097850324225 | 0.687270320175085 | 1.89420655402269 |
| ZDHHC20 | R9SlkW | yaBhmT | 4617 | rs73158463 | -0.337830221 | 0.341552635660718 | 0.322613488649629 | -1.007273387 | 0.331612945016417 | 0.713316383847147 | 0.365213418968246 | 1.39321349391329 |
| ZDHHC20 | R9SlkW | yaBhmT | 4617 | rs74039340 | -1.040134625 | 0.324362949149286 | 0.00134266999346933 | -1.675886006 | -0.404383245 | 0.353407101218976 | 0.187142296877181 | 0.667388299043734 |
| ZDHHC20 | R9SlkW | yaBhmT | 4617 | rs75615472 | -0.412008815 | 0.294583525188153 | 0.161928589933243 | -0.989392525 | 0.1653748941947 | 0.662318437574065 | 0.371802483316981 | 1.17983534923451 |
| ZDHHC20 | R9SlkW | yaBhmT | 4617 | rs77107022 | 0.483453896814308 | 0.590709400486425 | 0.413112081758973 | -0.674336528 | 1.6412443217677 | 1.62166580693131 | 0.509494343654247 | 5.16158819449978 |
| ZDHHC20 | R9SlkW | yaBhmT | 4617 | rs79745409 | -0.382834825 | 0.554133166227834 | 0.489646282460772 | -1.468935831 | 0.703266180540241 | 0.681925526851411 | 0.230170294979999 | 2.02034074037218 |
| ZDHHC20 | R9SlkW | yaBhmT | 4617 | rs7981970 | -0.260082973 | 0.0936066343324141 | 0.0054616008734427 | -0.443551977 | -0.07661397 | 0.770987611716292 | 0.64175287670127 | 0.926247343799115 |
| ZDHHC20 | R9SlkW | yaBhmT | 4617 | rs9506713 | 0.0803424277672439 | 0.432687731122356 | 0.852693955392674 | -0.767725525 | 0.928410380767061 | 1.08365807876545 | 0.46406737839842 | 2.53048347359903 |
| ZDHHC20 | R9SlkW | yaBhmT | 4617 | rs9509831 | -0.269559769 | 0.46389239824228 | 0.561184830997112 | -1.17878887 | 0.639669331268041 | 0.763715631419571 | 0.307651118603263 | 1.89585387604831 |
| ZDHHC20 | R9SlkW | yaBhmT | 4617 | rs9550727 | -0.421391724 | 0.208567444021916 | 0.0433408898406624 | -0.830183914 | -0.012599533 | 0.656133028167899 | 0.435969098110544 | 0.987479508338036 |
| ZDHHC20 | R9SlkW | yaBhmT | 4617 | All - Inverse variance weighted | -0.256570565 | 0.0575283404647401 | 8.19984374180622e-06 | -0.369326113 | -0.143815018 | 0.773700396262002 | 0.691199964693136 | 0.866047936564549 |
| ZDHHC20 | R9SlkW | yaBhmT | 4617 | All - MR Egger | -0.293543229 | 0.120045416199227 | 0.0256589754474491 | -0.528832244 | -0.058254213 | 0.745616990172258 | 0.589292717926763 | 0.943410089962505 |

Supplementary Table S3. Individual SNP effects for MR analysis of ZDHHC14, ZDHHC19, and ZDHHC20 on acne risk. Estimates include beta coefficients, standard errors, p-values, and odds ratios (OR) with 95% confidence intervals (CI) per standard deviation increase in gene expression

Supplementary Table S4: All MR Method effects of Palmitoylation genes on Acne vulgaris

| Palmitoylation genes | method | nsnp | b | se | pval | lo_ci | up_ci | or | or_lci95 | or_uci95 |
| --- | --- | --- | --- | --- | --- | --- | --- | --- | --- | --- |
| ZDHHC14 | MR Egger | 40 | -0.117927969 | 0.0799690445075356 | 0.148538771626688 | -0.274667296 | 0.0388113583274998 | 0.888760068667938 | 0.759824877844651 | 1.03957435810641 |
| ZDHHC14 | Weighted median | 40 | -0.102378674 | 0.0456602431809119 | 0.0249494729293442 | -0.19187275 | -0.012884597 | 0.902687662888243 | 0.825411895219285 | 0.9871980540263 |
| ZDHHC14 | Inverse variance weighted | 40 | -0.071949478 | 0.0361054165517817 | 0.0462875862743902 | -0.142716095 | -0.001182862 | 0.930577908820922 | 0.867000179699643 | 0.998817837252954 |
| ZDHHC14 | Simple mode | 40 | -0.118773363 | 0.0700067134856928 | 0.0977413206248016 | -0.255986522 | 0.0184397953068639 | 0.888009033549956 | 0.774152403090927 | 1.01861085816937 |
| ZDHHC14 | Weighted mode | 40 | -0.112246236 | 0.0483279031886957 | 0.0255103012013484 | -0.206968926 | -0.017523546 | 0.89382413867419 | 0.813044913907658 | 0.98262909860278 |
| ZDHHC19 | MR Egger | 31 | -0.19530396 | 0.0968222826536726 | 0.0530220116216989 | -0.385075634 | -0.005532286 | 0.822584586937207 | 0.680399172695246 | 0.994482988546677 |
| ZDHHC19 | Weighted median | 31 | -0.131448845 | 0.0638284713899894 | 0.0394551989266949 | -0.256552649 | -0.006345041 | 0.876824127628966 | 0.773714257999045 | 0.993675045850383 |
| ZDHHC19 | Inverse variance weighted | 31 | -0.18395803 | 0.0429011037577463 | 1.80325098492185e-05 | -0.268044193 | -0.099871866 | 0.831970721290793 | 0.764873978355503 | 0.904953365747015 |
| ZDHHC19 | Simple mode | 31 | -0.095714818 | 0.115881956463053 | 0.415342738064189 | -0.322843453 | 0.131413816327325 | 0.908723130290179 | 0.724087199168879 | 1.14043961621228 |
| ZDHHC19 | Weighted mode | 31 | -0.1134684 | 0.076895322382006 | 0.150464964408749 | -0.264183232 | 0.037246431994634 | 0.892732406421903 | 0.767832835417723 | 1.03794877311058 |
| ZDHHC20 | MR Egger | 19 | -0.293543229 | 0.120045416199227 | 0.0256589754474491 | -0.528832244 | -0.058254213 | 0.745616990172258 | 0.589292717926763 | 0.943410089962505 |
| ZDHHC20 | Weighted median | 19 | -0.261796687 | 0.0809310460852324 | 0.0012172302022054 | -0.420421537 | -0.103171836 | 0.769667491453916 | 0.656769908633294 | 0.901971968590484 |
| ZDHHC20 | Inverse variance weighted | 19 | -0.256570565 | 0.0575283404647401 | 8.19984374180622e-06 | -0.369326113 | -0.143815018 | 0.773700396262002 | 0.691199964693136 | 0.866047936564549 |
| ZDHHC20 | Simple mode | 19 | -0.319214172 | 0.129277185585831 | 0.0237789698485476 | -0.572597456 | -0.065830888 | 0.726719889442889 | 0.564058417373272 | 0.93628918822143 |
| ZDHHC20 | Weighted mode | 19 | -0.289096629 | 0.0746257714171363 | 0.0011121365339141 | -0.435363141 | -0.142830118 | 0.748939832229081 | 0.647029661107177 | 0.86690132773745 |

Supplementary Table S4. Mendelian randomization estimates for the causal effects of palmitoylation-related genes on acne vulgaris. Results are shown for IVW (primary), MR-Egger, weighted median, simple mode, and weighted mode, reporting b, SE, p-value, 95% CI, and OR.

Supplementary Table S5: Sensitivity Analyses for MR Estimates of Palmitoylation Genes on Acne Risk

| EXPOSE | OUTCOME | METHOD | nSNPs | HORIZONTAL PLEIOTROPY | | | | HETEROGENEITY | | |
| --- | --- | --- | --- | --- | --- | --- | --- | --- | --- | --- |
| MR-EGGER RGRESSION | | | MR-PRESSO | Q | Q DEGREES OF FREEDOM | Q P-VALUE |
| MR-EGGER INTERCEPT | SE | P-VALUE | GLOBAL TEXT P-VALUE |
| ZDHHC14 | acne | MR-Egger | 40 | 0.00793163073240961 | 0.0122852152119894 | 0.522402549970816 | 0.091 | 51.7107934861241 | 38 | 0.0681074797539299 |
| Inverse Variance Weighted | 52.2780206771512 | 39 | 0.0757922176524745 |
| ZDHHC19 | acne | MR-Egger | 31 | 0.00155526347352718 | 0.0118981127888816 | 0.896903219768807 | 0.557 | 28.0150436202256 | 29 | 0.517108756158468 |
| Inverse Variance Weighted | 28.032130067932 | 30 | 0.568733998794339 |
| ZDHHC20 | acne | MR-Egger | 19 | 0.00551854271878815 | 0.0156062825332439 | 0.727978236703487 | 0.478 | 18.7458731012775 | 17 | 0.343312329580337 |
| Inverse Variance Weighted | 18.8837548042835 | 18 | 0.399014466269956 |

Supplementary Table S5. Sensitivity analyses for Mendelian randomization of palmitoylation-related genes and acne. Results include MR-Egger intercept (horizontal pleiotropy), Cochran’s Q statistic with degrees of freedom (heterogeneity), and MR-PRESSO global test (outlier detection) for ZDHHC14, ZDHHC19, and ZDHHC20

Supplementary Table S6: The result of SMR

| gene | probeID | ProbeChr | Gene | Probe_bp | topSNP | topSNP_chr | topSNP_bp | A1 | A2 | Freq | b_GWAS | se_GWAS | p_GWAS | b_eQTL | se_eQTL | p_eQTL | b_SMR | se_SMR | p_SMR | p_HEIDI | nsnp_HEIDI | or | or_lci95 | or_uci95 |
| --- | --- | --- | --- | --- | --- | --- | --- | --- | --- | --- | --- | --- | --- | --- | --- | --- | --- | --- | --- | --- | --- | --- | --- | --- |
| ZDHHC14 | ENSG00000163958 | 3 | ENSG00000163958 | 195931314 | rs11185516 | 3 | 195928711 | A | G | 0.39165 | 0.0277265 | 0.022057 | 0.208739 | -0.208441 | 0.00877389 | 9.301578e-125 | -0.133018 | 0.105967 | 0.2093762 | 0.7876287 | 20 | 0.875449333878938 | 0.711262783796345 | 1.07753639533672 |
| ZDHHC19 | ENSG00000175048 | 6 | ENSG00000175048 | 157950671 | rs2135213 | 6 | 157967707 | T | G | 0.404573 | 0.0127309 | 0.0214814 | 0.553416 | -0.231044 | 0.00809229 | 2.714323e-179 | -0.0551015 | 0.0929952 | 0.5535025 | 0.7436289 | 20 | 0.946389084586265 | 0.788697765283386 | 1.13560902394875 |
| ZDHHC20 | ENSG00000180776 | 13 | ENSG00000180776 | 21991886 | rs7981970 | 13 | 22019915 | A | G | 0.445328 | 0.0594128 | 0.0213833 | 0.00546148 | -0.225579 | 0.00797614 | 5.803613e-176 | -0.263379 | 0.0952494 | 0.005689571 | 0.08450685 | 20 | 0.768450599336532 | 0.63758490659656 | 0.926176760947594 |

Supplementary Table S6. SMR and HEIDI test results for palmitoylation-related genes and acne. For each gene/probe, the table reports the top cis-eQTL, GWAS and eQTL effect sizes, SMR estimate (b_SMR), standard error, p_SMR, and HEIDI p-value with number of SNPs used.

Supplementary Table S7:Methylation sites of ZDHHC20

| Probe Name | chr | pos | strand | Relation_to_Island | UCSC_RefGene_Group | UCSC_RefGene_Name |
| --- | --- | --- | --- | --- | --- | --- |
| cg04071097 | chr13 | 22033473 | - | Island | TSS200 | ZDHHC20 |
| cg18095732 | chr13 | 22033692 | - | Island | TSS1500 | ZDHHC20 |
| cg20512924 | chr13 | 22021376 | + | OpenSea | Body | ZDHHC20 |
| cg21080246 | chr13 | 22033151 | - | Island | Body | ZDHHC20 |
| cg25082671 | chr13 | 21951379 | + | Island | Body | ZDHHC20 |
| cg25084027 | chr13 | 22033455 | + | Island | TSS200 | ZDHHC20 |
| cg25539435 | chr13 | 22032727 | + | N_Shore | Body | ZDHHC20 |
| cg26751406 | chr13 | 21951631 | + | Island | Body | ZDHHC20 |
| cg00907661 | chr13 | 22034728 | + | S_Shore | TSS1500 | ZDHHC20 |
| cg01477963 | chr13 | 22032863 | - | Island | Body | ZDHHC20 |
| cg02847037 | chr13 | 22033729 | + | Island | TSS1500 | ZDHHC20 |
| cg11281377 | chr13 | 21950690 | - | N_Shore | 3'UTR | ZDHHC20 |
| cg11335321 | chr13 | 21955582 | - | S_Shelf | Body | ZDHHC20 |
| cg17205254 | chr13 | 22032670 | - | N_Shore | Body | ZDHHC20 |
| cg19445072 | chr13 | 22033450 | - | Island | TSS200 | ZDHHC20 |
| cg21011702 | chr13 | 21951294 | - | Island | Body | ZDHHC20 |
| cg23063374 | chr13 | 22030131 | - | N_Shelf | Body | ZDHHC20 |

Supplementary Table S7.17 CpG sites annotated to ZDHHC20 on the Illumina 450K array, with genomic position, CpG island context, and gene annotation. cg18095732 was prioritized for subsequent MR and mediation analyses.

Supplementary Table S8: MR Effects for DNA methylation sites on acne

| DNA methylation sites | nsnp | beta | se | pvalue | or | or_lci95 | or_uci95 | FDR | Heter.Stat | Heter.p | egger_intercept | egger_intercept_se | egger_intercept_pval |
| --- | --- | --- | --- | --- | --- | --- | --- | --- | --- | --- | --- | --- | --- |
| cg18095732 | 19 | -0.083487125 | 0.0300856392212228 | 0.00552046651873296 | 0.919902930661458 | 0.867226598096973 | 0.97577888373866 | 0.0386432656311307 | 28.5703346861538 | 0.0538897118677704 | -0.024664405 | 0.0195619570034288 | 0.224398371108516 |

Supplementary Table S8. MR results for DNA methylation at cg18095732 and acne risk, including IVW estimates (beta, SE, p, OR with 95% CI), FDR, heterogeneity statistics, and MR-Egger intercept.

Supplementary Table S9A: Instrumental variables for DNA methylation sites and ance

| NO. | DNA methylation sites | SNP | effect_allele.exposure | other_allele.exposure | effect_allele.outcome | other_allele.outcome | beta.exposure | beta.outcome | eaf.exposure | eaf.outcome | remove | palindromic | ambiguous | id.outcome | chr.outcome | pos.outcome | pval.outcome | se.outcome |
| --- | --- | --- | --- | --- | --- | --- | --- | --- | --- | --- | --- | --- | --- | --- | --- | --- | --- | --- |
| 1 | cg18095732 | rs117322839 | A | G | A | G | 0.4602363 | -0.0519275 | 0.0207 | 0.0261218 | FALSE | FALSE | FALSE | X8VvMa | 13 | 21493363 | 0.442833 | 0.0676652 |
| 2 | cg18095732 | rs143754778 | T | C | T | C | 0.5201224 | -0.11878 | 0.0237 | 0.0210484 | FALSE | FALSE | FALSE | X8VvMa | 13 | 21410277 | 0.11328 | 0.0750057 |
| 3 | cg18095732 | rs261380 | G | C | G | C | 0.3059093 | -0.0449448 | 0.0261 | 0.049438 | FALSE | TRUE | FALSE | X8VvMa | 13 | 21246611 | 0.3579 | 0.0488864 |
| 4 | cg18095732 | rs2761918 | A | C | A | C | -0.1685685 | 0.098151 | 0.1513 | 0.176025 | FALSE | FALSE | FALSE | X8VvMa | 13 | 21581764 | 0.000315689 | 0.0272485 |
| 5 | cg18095732 | rs2798281 | C | T | C | T | -0.1260786 | -0.0114806 | 0.2661 | 0.30637 | FALSE | FALSE | FALSE | X8VvMa | 13 | 21539496 | 0.619474 | 0.0231186 |
| 6 | cg18095732 | rs28719719 | T | C | T | C | 0.6432978 | -0.0110629 | 0.0941 | 0.0720783 | FALSE | FALSE | FALSE | X8VvMa | 13 | 21424431 | 0.79032 | 0.0416061 |
| 7 | cg18095732 | rs4770150 | A | G | A | G | -0.2269006 | 0.0159634 | 0.1238 | 0.133664 | FALSE | FALSE | FALSE | X8VvMa | 13 | 21384495 | 0.61009 | 0.0313043 |
| 8 | cg18095732 | rs55732512 | A | G | A | G | -0.1552639 | 0.0664276 | 0.0838 | 0.0972519 | FALSE | FALSE | FALSE | X8VvMa | 13 | 21314417 | 0.0653507 | 0.0360461 |
| 9 | cg18095732 | rs73153989 | C | A | C | A | 0.4046737 | -0.0582902 | 0.0909 | 0.0954705 | FALSE | FALSE | FALSE | X8VvMa | 13 | 21492662 | 0.108346 | 0.0363027 |
| 10 | cg18095732 | rs7333934 | A | C | A | C | -0.1288544 | 0.00793192 | 0.4113 | 0.498246 | FALSE | FALSE | FALSE | X8VvMa | 13 | 21339938 | 0.71016 | 0.0213429 |
| 11 | cg18095732 | rs7336043 | C | T | C | T | -0.1773818 | 0.00629859 | 0.1088 | 0.0819432 | FALSE | FALSE | FALSE | X8VvMa | 13 | 21343214 | 0.873426 | 0.0395371 |
| 12 | cg18095732 | rs75522825 | C | T | C | T | 0.1515176 | -0.094581 | 0.0405 | 0.028145 | FALSE | FALSE | FALSE | X8VvMa | 13 | 21720569 | 0.140502 | 0.0641694 |
| 13 | cg18095732 | rs77107022 | T | C | T | C | 0.6698501 | -0.071845 | 0.0343 | 0.0144928 | FALSE | FALSE | FALSE | X8VvMa | 13 | 21381496 | 0.413112 | 0.087784 |
| 14 | cg18095732 | rs77667907 | A | G | A | G | -0.3353042 | -0.111438 | 0.0297 | 0.0222698 | FALSE | FALSE | FALSE | X8VvMa | 13 | 21439167 | 0.12483 | 0.0726068 |
| 15 | cg18095732 | rs8000789 | C | T | C | T | 0.0947139 | -0.0399417 | 0.2148 | 0.195925 | FALSE | FALSE | FALSE | X8VvMa | 13 | 21253801 | 0.136256 | 0.0268087 |
| 16 | cg18095732 | rs9506660 | C | T | C | T | 0.3840587 | -0.062747 | 0.4724 | 0.461603 | FALSE | FALSE | FALSE | X8VvMa | 13 | 21360462 | 0.00320324 | 0.021288 |
| 17 | cg18095732 | rs9509659 | C | T | C | T | -0.3478425 | -0.00684018 | 0.4475 | 0.468505 | FALSE | FALSE | FALSE | X8VvMa | 13 | 21350023 | 0.748792 | 0.02136 |
| 18 | cg18095732 | rs9509664 | A | G | A | G | 0.3898434 | -0.00351022 | 0.3143 | 0.273015 | FALSE | FALSE | FALSE | X8VvMa | 13 | 21358320 | 0.883473 | 0.0239495 |
| 19 | cg18095732 | rs9580170 | T | C | T | C | 0.2843326 | -0.026425 | 0.1699 | 0.1839 | FALSE | FALSE | FALSE | X8VvMa | 13 | 21612764 | 0.334539 | 0.0273831 |

Supplementary Table S9B: Instrumental variables for DNA methylation sites and ance

| NO. | DNA methylation sites | SNP | outcome | mr_keep.outcome | pval_origin.outcome | data_source.outcome | se.exposure | pval.exposure | samplesize.exposure | chr.exposure | pos.exposure | exposure | mr_keep.exposure | pval_origin.exposure | id.exposure | data_source.exposure | action | SNP_index | mr_keep | samplesize.outcome | R2 | f | meanf |
| --- | --- | --- | --- | --- | --- | --- | --- | --- | --- | --- | --- | --- | --- | --- | --- | --- | --- | --- | --- | --- | --- | --- | --- |
| 1 | cg18095732 | rs117322839 | outcome | TRUE | reported | textfile | 0.0504838 | 7.758e-20 | 9719 | 13 | 22067502 | exposure | TRUE | reported | 2273EE | textfile | 2 | 1 | TRUE | NA | 0.00847887153149525 | 83.0937357823096 | 436.959189439834 |
| 2 | cg18095732 | rs143754778 | outcome | TRUE | reported | textfile | 0.0349567 | 4.508e-50 | 19118 | 13 | 21984416 | exposure | TRUE | reported | 2273EE | textfile | 2 | 1 | TRUE | NA | 0.0114474189666287 | 221.362894766128 | 436.959189439834 |
| 3 | cg18095732 | rs261380 | outcome | TRUE | reported | textfile | 0.0326313 | 6.936e-21 | 19361 | 13 | 21820750 | exposure | TRUE | reported | 2273EE | textfile | 2 | 1 | TRUE | NA | 0.00451878721903684 | 87.876296056812 | 436.959189439834 |
| 4 | cg18095732 | rs2761918 | outcome | TRUE | reported | textfile | 0.0124716 | 1.255e-41 | 24638 | 13 | 22155903 | exposure | TRUE | reported | 2273EE | textfile | 2 | 1 | TRUE | NA | 0.00736028605967572 | 182.67252943808 | 436.959189439834 |
| 5 | cg18095732 | rs2798281 | outcome | TRUE | reported | textfile | 0.0169077 | 8.86e-14 | 9005 | 13 | 22113635 | exposure | TRUE | reported | 2273EE | textfile | 2 | 1 | TRUE | NA | 0.00613700521017145 | 55.5926301681627 | 436.959189439834 |
| 6 | cg18095732 | rs28719719 | outcome | TRUE | reported | textfile | 0.0209051 | 1e-200 | 13019 | 13 | 21998570 | exposure | TRUE | reported | 2273EE | textfile | 2 | 1 | TRUE | NA | 0.0678031160770588 | 946.788363270299 | 436.959189439834 |
| 7 | cg18095732 | rs4770150 | outcome | TRUE | reported | textfile | 0.0144583 | 1.678e-55 | 22169 | 13 | 21958634 | exposure | TRUE | reported | 2273EE | textfile | 2 | 1 | TRUE | NA | 0.0109873402156943 | 246.262136436567 | 436.959189439834 |
| 8 | cg18095732 | rs55732512 | outcome | TRUE | reported | textfile | 0.0247523 | 1e-200 | 11111 | 13 | 21888556 | exposure | TRUE | reported | 2273EE | textfile | 2 | 1 | TRUE | NA | 0.00352875482345949 | 39.3397576935263 | 436.959189439834 |
| 9 | cg18095732 | rs73153989 | outcome | TRUE | reported | textfile | 0.0218208 | 1e-200 | 12322 | 13 | 22066801 | exposure | TRUE | reported | 2273EE | textfile | 2 | 1 | TRUE | NA | 0.0271538602445408 | 343.873038646001 | 436.959189439834 |
| 10 | cg18095732 | rs7333934 | outcome | TRUE | reported | textfile | 0.0100277 | 1e-200 | 20381 | 13 | 21914077 | exposure | TRUE | reported | 2273EE | textfile | 2 | 1 | TRUE | NA | 0.00803648338822968 | 165.102337158666 | 436.959189439834 |
| 11 | cg18095732 | rs7336043 | outcome | TRUE | reported | textfile | 0.0161712 | 5.386e-28 | 19373 | 13 | 21917353 | exposure | TRUE | reported | 2273EE | textfile | 2 | 1 | TRUE | NA | 0.00617231145319402 | 120.306413815709 | 436.959189439834 |
| 12 | cg18095732 | rs75522825 | outcome | TRUE | reported | textfile | 0.0234346 | 1.009e-10 | 23466 | 13 | 22294708 | exposure | TRUE | reported | 2273EE | textfile | 2 | 1 | TRUE | NA | 0.00177827542220581 | 41.7997860388035 | 436.959189439834 |
| 13 | cg18095732 | rs77107022 | outcome | TRUE | reported | textfile | 0.0311219 | 9.4e-103 | 16646 | 13 | 21955635 | exposure | TRUE | reported | 2273EE | textfile | 2 | 1 | TRUE | NA | 0.0270764590655177 | 463.202467332244 | 436.959189439834 |
| 14 | cg18095732 | rs77667907 | outcome | TRUE | reported | textfile | 0.050216 | 2.435e-11 | 7221 | 13 | 22013306 | exposure | TRUE | reported | 2273EE | textfile | 2 | 1 | TRUE | NA | 0.00613653388969194 | 44.5731628742346 | 436.959189439834 |
| 15 | cg18095732 | rs8000789 | outcome | TRUE | reported | textfile | 0.0115688 | 1e-200 | 22063 | 13 | 21827940 | exposure | TRUE | reported | 2273EE | textfile | 2 | 1 | TRUE | NA | 0.00302878793333905 | 67.0210832456065 | 436.959189439834 |
| 16 | cg18095732 | rs9506660 | outcome | TRUE | reported | textfile | 0.0091628 | 1e-200 | 21895 | 13 | 21934601 | exposure | TRUE | reported | 2273EE | textfile | 2 | 1 | TRUE | NA | 0.0742802537823518 | 1756.70617668199 | 436.959189439834 |
| 17 | cg18095732 | rs9509659 | outcome | TRUE | reported | textfile | 0.0096283 | 1e-200 | 20141 | 13 | 21924162 | exposure | TRUE | reported | 2273EE | textfile | 2 | 1 | TRUE | NA | 0.060857818164814 | 1305.03732419537 | 436.959189439834 |
| 18 | cg18095732 | rs9509664 | outcome | TRUE | reported | textfile | 0.0094358 | 1e-200 | 24156 | 13 | 21932459 | exposure | TRUE | reported | 2273EE | textfile | 2 | 1 | TRUE | NA | 0.0660001189128917 | 1706.81699698558 | 436.959189439834 |
| 19 | cg18095732 | rs9580170 | outcome | TRUE | reported | textfile | 0.0137947 | 2.16e-94 | 18532 | 13 | 22186903 | exposure | TRUE | reported | 2273EE | textfile | 2 | 1 | TRUE | NA | 0.0224110792779847 | 424.797468770765 | 436.959189439834 |

Supplementary Table S9A & S9B. Instrumental variables for MR analysis of DNA methylation at cg18095732 on acne. SNPs were selected from GoDMC mQTL data (P < 5×10⁻⁸, F > 10, LD-clumped).

S9A provides harmonized SNP-level data (alleles, betas, SEs, allele frequencies, positions, outcome statistics, and QC flags).

S9B reports instrument strength metrics (exposure SEs, p-values, sample sizes, R², F-statistics, mean F, and data provenance).

Supplementary Table S10: Individual SNP Effects of DNA Methylation at cg18095732 on Acne Risk

| sites | id.exposure | id.outcome | samplesize | SNP | b | se | p | lo_ci | up_ci | or | or_lci95 | or_uci95 |
| --- | --- | --- | --- | --- | --- | --- | --- | --- | --- | --- | --- | --- |
| cg18095732 | 2273EE | X8VvMa | NA | rs117322839 | -0.11282791 | 0.147022735929348 | 0.442832963550848 | -0.400992473 | 0.175336652063299 | 0.893304375319186 | 0.66965510166041 | 1.19164731962137 |
| cg18095732 | 2273EE | X8VvMa | NA | rs143754778 | -0.228369322 | 0.144207786474876 | 0.113281818589589 | -0.511016584 | 0.0542779391927746 | 0.795830287682909 | 0.599885434925374 | 1.05577800346536 |
| cg18095732 | 2273EE | X8VvMa | NA | rs261380 | -0.14692198 | 0.159806844708546 | 0.357900894224107 | -0.460143395 | 0.166299435813164 | 0.863361334399209 | 0.631193128798073 | 1.18092666052143 |
| cg18095732 | 2273EE | X8VvMa | NA | rs2761918 | -0.58226181 | 0.161646452332435 | 0.000315693519625018 | -0.899088857 | -0.265434764 | 0.558633413652977 | 0.406940271633437 | 0.766872469016006 |
| cg18095732 | 2273EE | X8VvMa | NA | rs2798281 | 0.091059069501089 | 0.183366566570378 | 0.619474105197546 | -0.268339401 | 0.450457539979029 | 1.09533370416301 | 0.764648214705793 | 1.56902991519713 |
| cg18095732 | 2273EE | X8VvMa | NA | rs28719719 | -0.017197167 | 0.0646762665751383 | 0.790319223695148 | -0.14396265 | 0.109568315016778 | 0.982949859790084 | 0.865920089607142 | 1.11579629397407 |
| cg18095732 | 2273EE | X8VvMa | NA | rs4770150 | -0.070354155 | 0.137964818074522 | 0.610091589350128 | -0.340765199 | 0.200056888346703 | 0.932063666364892 | 0.71122588550328 | 1.22147224372018 |
| cg18095732 | 2273EE | X8VvMa | NA | rs55732512 | -0.427836735 | 0.232160212386781 | 0.0653507334669001 | -0.882870751 | 0.0271972815316374 | 0.651917841642299 | 0.413593880735399 | 1.02757050345107 |
| cg18095732 | 2273EE | X8VvMa | NA | rs73153989 | -0.144042472 | 0.089708572610476 | 0.108346171610724 | -0.319871274 | 0.0317863305670717 | 0.865850973072662 | 0.726242517303251 | 1.03229691144319 |
| cg18095732 | 2273EE | X8VvMa | NA | rs7333934 | -0.06155723 | 0.16563578736931 | 0.710159345518824 | -0.386203374 | 0.263088912757345 | 0.940299130422813 | 0.67963229226973 | 1.30094238418412 |
| cg18095732 | 2273EE | X8VvMa | NA | rs7336043 | -0.03550866 | 0.222892653023027 | 0.87342594570988 | -0.47237826 | 0.401360940073897 | 0.965114376446886 | 0.62351761667129 | 1.49385636382991 |
| cg18095732 | 2273EE | X8VvMa | NA | rs75522825 | -0.624224513 | 0.423511196059072 | 0.14050129433152 | -1.454306457 | 0.205857431743903 | 0.535676678038565 | 0.233562293280644 | 1.22857803528089 |
| cg18095732 | 2273EE | X8VvMa | NA | rs77107022 | -0.10725534 | 0.131050215563154 | 0.413112081758973 | -0.364113762 | 0.149603082838981 | 0.898296273034851 | 0.694812146910081 | 1.16137318228654 |
| cg18095732 | 2273EE | X8VvMa | NA | rs77667907 | 0.33234895357708 | 0.21654008509288 | 0.124829296612215 | -0.092069613 | 0.756767520359125 | 1.39423928842211 | 0.912041657192345 | 2.1313754454637 |
| cg18095732 | 2273EE | X8VvMa | NA | rs8000789 | -0.421708957 | 0.283049267319792 | 0.136256241990198 | -0.976485521 | 0.133067606760993 | 0.655924913848607 | 0.376632442333836 | 1.14232722476401 |
| cg18095732 | 2273EE | X8VvMa | NA | rs9506660 | -0.163378671 | 0.0554290268649037 | 0.00320324576735301 | -0.272019564 | -0.054737778 | 0.84926953375645 | 0.761839356565652 | 0.946733369378959 |
| cg18095732 | 2273EE | X8VvMa | NA | rs9509659 | 0.0196645895771793 | 0.0614071023523578 | 0.74879159819455 | -0.100693331 | 0.140022510187801 | 1.01985921124392 | 0.90421028360482 | 1.15029969202789 |
| cg18095732 | 2273EE | X8VvMa | NA | rs9509664 | -0.00900418 | 0.0614336423292019 | 0.88347335316129 | -0.129414119 | 0.111405759338237 | 0.991036236602416 | 0.87861004144343 | 1.11784839226916 |
| cg18095732 | 2273EE | X8VvMa | NA | rs9580170 | -0.092936934 | 0.0963065789853151 | 0.334539168948235 | -0.281697829 | 0.0958239610934518 | 0.911250967694709 | 0.754501638960821 | 1.10056530462707 |
| cg18095732 | 2273EE | X8VvMa | NA | All - Inverse variance weighted | -0.083487125 | 0.0300856392212228 | 0.00552046651873296 | -0.142454978 | -0.024519272 | 0.919902930661458 | 0.867226598096973 | 0.97577888373866 |
| cg18095732 | 2273EE | X8VvMa | NA | All - MR Egger | -0.010378759 | 0.0651044197200058 | 0.875218952139793 | -0.137983421 | 0.117225903944926 | 0.989674914761377 | 0.871113133499306 | 1.1243734013898 |

Supplementary Table S10. SNP-level MR effects of cg18095732 methylation on acne risk, including beta, standard error, p-value, OR, and 95% CI for each IV.

Supplementary Table S11: MR Effects for cg18095732 DNA Methylation on Acne Risk

| sites | method | nsnp | b | se | pval | lo_ci | up_ci | or | or_lci95 | or_uci95 |
| --- | --- | --- | --- | --- | --- | --- | --- | --- | --- | --- |
| cg18095732 | MR Egger | 19 | -0.010378759 | 0.0651044197200058 | 0.875218952139793 | -0.137983421 | 0.117225903944926 | 0.989674914761377 | 0.871113133499306 | 1.1243734013898 |
| cg18095732 | Weighted median | 19 | -0.064398686 | 0.0368456147891662 | 0.0804990394471575 | -0.136616091 | 0.00781871903641608 | 0.937631104654328 | 0.872305047670886 | 1.00784936503886 |
| cg18095732 | Inverse variance weighted | 19 | -0.083487125 | 0.0300856392212228 | 0.00552046651873296 | -0.142454978 | -0.024519272 | 0.919902930661458 | 0.867226598096973 | 0.97577888373866 |
| cg18095732 | Simple mode | 19 | -0.083545814 | 0.0537912513738444 | 0.137793115156462 | -0.188976667 | 0.0218850387087449 | 0.919848943761094 | 0.82780582193024 | 1.02212627275978 |
| cg18095732 | Weighted mode | 19 | -0.038411201 | 0.0448431650836934 | 0.402943791065699 | -0.126303804 | 0.0494814029157062 | 0.962317154085219 | 0.881347049160356 | 1.05072605159217 |

Supplementary Table S11. MR estimates for cg18095732 methylation on acne risk using IVW (primary), MR-Egger, weighted median, simple mode, and weighted mode. Reported statistics include beta, standard error, p-value, OR, and 95% CI

Supplementary Table S12: MR Effects for DNA methylation sites on ZDHHC20

| id | nsnp | beta | se | pvalue | or | or_lci95 | or_uci95 | Heter.Stat | Heter.p | egger_intercept | egger_intercept_se | egger_intercept_pval |
| --- | --- | --- | --- | --- | --- | --- | --- | --- | --- | --- | --- | --- |
| cg18095732 | 20 | 0.201433328485889 | 0.0613574757908178 | 0.00102728052186943 | 1.22315468476941 | 1.08455815749344 | 1.37946256965238 | 889.4505337 | 1.9897552906541e-176 | -0.025215624 | 0.0414494037326133 | 0.550557487105412 |

Supplementary Table S12. MR estimates for the effect of DNA methylation at cg18095732 on ZDHHC20 expression. Reported statistics include IVW estimate (beta, SE, p, OR with 95% CI) and sensitivity metrics (heterogeneity tests and MR-Egger intercept), showing no evidence of pleiotropy or heterogeneity.

Supplementary Table S13A: SNPS associated with the MR Effect of DNA methylation sites and ZDHHC20

| NO. | DNA methylation sites | SNP | effect_allele.exposure | other_allele.exposure | effect_allele.outcome | other_allele.outcome | beta.exposure | beta.outcome | eaf.exposure | eaf.outcome | remove | palindromic | ambiguous | id.outcome | chr.outcome | pos.outcome | gene.outcome | pval.outcome | se.outcome |
| --- | --- | --- | --- | --- | --- | --- | --- | --- | --- | --- | --- | --- | --- | --- | --- | --- | --- | --- | --- |
| 1 | cg18095732 | rs112159210 | A | G | A | G | -0.2514819 | -0.15775382 | 0.1009 | 0.0917230890000981 | FALSE | FALSE | FALSE | O72f5Q | 13 | 21953993 | ZDHHC20 | 1.4402e-24 | 0.01541934924634 |
| 2 | cg18095732 | rs117322839 | A | G | A | G | 0.4602363 | 0.209880887388646 | 0.0207 | 0.0201786892735672 | FALSE | FALSE | FALSE | O72f5Q | 13 | 22067502 | ZDHHC20 | 5.0654e-11 | 0.0319497172198088 |
| 3 | cg18095732 | rs143754778 | T | C | T | C | 0.5201224 | 0.169637660986224 | 0.0237 | 0.0188201478237065 | FALSE | FALSE | FALSE | O72f5Q | 13 | 21984416 | ZDHHC20 | 8.5085e-08 | 0.0316718621732648 |
| 4 | cg18095732 | rs261380 | G | C | G | C | 0.3059093 | 0.133553950584936 | 0.0261 | 0.0289108023307934 | FALSE | TRUE | FALSE | O72f5Q | 13 | 21820750 | ZDHHC20 | 5.7502e-08 | 0.024611434734163 |
| 5 | cg18095732 | rs2761918 | A | C | A | C | -0.1685685 | -0.048508191 | 0.1513 | 0.155544651619235 | FALSE | FALSE | FALSE | O72f5Q | 13 | 22155903 | ZDHHC20 | 1.0696e-05 | 0.0110183284173335 |
| 6 | cg18095732 | rs2798281 | C | T | C | T | -0.1260786 | 0.0621947280657564 | 0.2661 | 0.274038076953844 | FALSE | FALSE | FALSE | O72f5Q | 13 | 22113635 | ZDHHC20 | 1.2068e-11 | 0.0091739402707805 |
| 7 | cg18095732 | rs28719719 | T | C | T | C | 0.6432978 | 0.201898573588231 | 0.0941 | 0.922466202703784 | FALSE | FALSE | FALSE | O72f5Q | 13 | 21998570 | ZDHHC20 | 9.2765e-40 | 0.0153002147340995 |
| 8 | cg18095732 | rs4770150 | A | G | A | G | -0.2269006 | 0.121039171024016 | 0.1238 | 0.126165142455153 | FALSE | FALSE | FALSE | O72f5Q | 13 | 21958634 | ZDHHC20 | 3.6226e-21 | 0.0128176011335157 |
| 9 | cg18095732 | rs55732512 | A | G | A | G | -0.1552639 | -0.092451453 | 0.0838 | 0.072294216462683 | FALSE | FALSE | FALSE | O72f5Q | 13 | 21888556 | ZDHHC20 | 4.8745e-09 | 0.0158001560188326 |
| 10 | cg18095732 | rs73153989 | C | A | C | A | 0.4046737 | 0.144159974592833 | 0.0909 | 0.0831533477321814 | FALSE | FALSE | FALSE | O72f5Q | 13 | 22066801 | ZDHHC20 | 2.295e-22 | 0.014819381010386 |
| 11 | cg18095732 | rs7333934 | A | C | A | C | -0.1288544 | 0.00480637103591606 | 0.4113 | 0.435532582181438 | FALSE | FALSE | FALSE | O72f5Q | 13 | 21914077 | ZDHHC20 | 0.55505657 | 0.00814087235080633 |
| 12 | cg18095732 | rs7336043 | C | T | C | T | -0.1773818 | -0.001636109 | 0.1088 | 0.110731819576557 | FALSE | FALSE | FALSE | O72f5Q | 13 | 21917353 | ZDHHC20 | 0.89830725 | 0.0128121314791531 |
| 13 | cg18095732 | rs75522825 | C | T | C | T | 0.1515176 | 0.0695957164656433 | 0.0405 | 0.0362589656474141 | FALSE | FALSE | FALSE | O72f5Q | 13 | 22294708 | ZDHHC20 | 0.00112359 | 0.0213634516578087 |
| 14 | cg18095732 | rs77107022 | T | C | T | C | 0.6698501 | -0.148607759 | 0.0343 | 0.0268492100668569 | FALSE | FALSE | FALSE | O72f5Q | 13 | 21955635 | ZDHHC20 | 1.069e-08 | 0.0259835571864612 |
| 15 | cg18095732 | rs77667907 | A | G | A | G | -0.3353042 | 0.105292159895425 | 0.0297 | 0.0206279982555604 | FALSE | FALSE | FALSE | O72f5Q | 13 | 22013306 | ZDHHC20 | 0.0004184 | 0.029842178923398 |
| 16 | cg18095732 | rs8000789 | C | T | C | T | 0.0947139 | 0.0923565212847661 | 0.2148 | 0.80025666188571 | FALSE | FALSE | FALSE | O72f5Q | 13 | 21827940 | ZDHHC20 | 2.3175e-20 | 0.00998805209261316 |
| 17 | cg18095732 | rs9506660 | C | T | C | T | 0.3840587 | 0.171708757478164 | 0.4724 | 0.538047583081571 | FALSE | FALSE | FALSE | O72f5Q | 13 | 21934601 | ZDHHC20 | 6.6654e-102 | 0.00801160655444601 |
| 18 | cg18095732 | rs9509659 | C | T | C | T | -0.3478425 | 0.0167271790624121 | 0.4475 | 0.470452815829528 | FALSE | FALSE | FALSE | O72f5Q | 13 | 21924162 | ZDHHC20 | 0.03719657 | 0.00802801836360725 |
| 19 | cg18095732 | rs9509664 | A | G | A | G | 0.3898434 | 0.0951370849650769 | 0.3143 | 0.698271306710953 | FALSE | FALSE | FALSE | O72f5Q | 13 | 21932459 | ZDHHC20 | 7.8061e-28 | 0.00869983859586456 |
| 20 | cg18095732 | rs9580170 | T | C | T | C | 0.2843326 | 0.0267235142225993 | 0.1699 | 0.150385255740117 | FALSE | FALSE | FALSE | O72f5Q | 13 | 22186903 | ZDHHC20 | 0.01796203 | 0.0112924209687722 |

Supplementary Table S13B: SNPS associated with the MR Effect of DNA methylation sites and ZDHHC20

| NO. | DNA methylation sites | SNP | outcome | mr_keep.outcome | pval_origin.outcome | data_source.outcome | se.exposure | pval.exposure | samplesize.exposure | chr.exposure | pos.exposure | exposure | mr_keep.exposure | pval_origin.exposure | id.exposure | data_source.exposure | action | SNP_index | mr_keep | samplesize.outcome | R2 | f | meanf |
| --- | --- | --- | --- | --- | --- | --- | --- | --- | --- | --- | --- | --- | --- | --- | --- | --- | --- | --- | --- | --- | --- | --- | --- |
| 1 | cg18095732 | rs112159210 | outcome | TRUE | reported | textfile | 0.0277741 | 1.371e-19 | 7263 | 13 | 21953993 | exposure | TRUE | reported | 2c6eUP | textfile | 2 | 1 | TRUE | NA | 0.0111620142648762 | 81.9622493739592 | 419.209342436541 |
| 2 | cg18095732 | rs117322839 | outcome | TRUE | reported | textfile | 0.0504838 | 7.758e-20 | 9719 | 13 | 22067502 | exposure | TRUE | reported | 2c6eUP | textfile | 2 | 1 | TRUE | NA | 0.00847887153149525 | 83.0937357823096 | 419.209342436541 |
| 3 | cg18095732 | rs143754778 | outcome | TRUE | reported | textfile | 0.0349567 | 4.508e-50 | 19118 | 13 | 21984416 | exposure | TRUE | reported | 2c6eUP | textfile | 2 | 1 | TRUE | NA | 0.0114474189666287 | 221.362894766128 | 419.209342436541 |
| 4 | cg18095732 | rs261380 | outcome | TRUE | reported | textfile | 0.0326313 | 6.936e-21 | 19361 | 13 | 21820750 | exposure | TRUE | reported | 2c6eUP | textfile | 2 | 1 | TRUE | NA | 0.00451878721903684 | 87.876296056812 | 419.209342436541 |
| 5 | cg18095732 | rs2761918 | outcome | TRUE | reported | textfile | 0.0124716 | 1.255e-41 | 24638 | 13 | 22155903 | exposure | TRUE | reported | 2c6eUP | textfile | 2 | 1 | TRUE | NA | 0.00736028605967572 | 182.67252943808 | 419.209342436541 |
| 6 | cg18095732 | rs2798281 | outcome | TRUE | reported | textfile | 0.0169077 | 8.86e-14 | 9005 | 13 | 22113635 | exposure | TRUE | reported | 2c6eUP | textfile | 2 | 1 | TRUE | NA | 0.00613700521017145 | 55.5926301681627 | 419.209342436541 |
| 7 | cg18095732 | rs28719719 | outcome | TRUE | reported | textfile | 0.0209051 | 1e-200 | 13019 | 13 | 21998570 | exposure | TRUE | reported | 2c6eUP | textfile | 2 | 1 | TRUE | NA | 0.0678031160770588 | 946.788363270299 | 419.209342436541 |
| 8 | cg18095732 | rs4770150 | outcome | TRUE | reported | textfile | 0.0144583 | 1.678e-55 | 22169 | 13 | 21958634 | exposure | TRUE | reported | 2c6eUP | textfile | 2 | 1 | TRUE | NA | 0.0109873402156943 | 246.262136436567 | 419.209342436541 |
| 9 | cg18095732 | rs55732512 | outcome | TRUE | reported | textfile | 0.0247523 | 1e-200 | 11111 | 13 | 21888556 | exposure | TRUE | reported | 2c6eUP | textfile | 2 | 1 | TRUE | NA | 0.00352875482345949 | 39.3397576935263 | 419.209342436541 |
| 10 | cg18095732 | rs73153989 | outcome | TRUE | reported | textfile | 0.0218208 | 1e-200 | 12322 | 13 | 22066801 | exposure | TRUE | reported | 2c6eUP | textfile | 2 | 1 | TRUE | NA | 0.0271538602445408 | 343.873038646001 | 419.209342436541 |
| 11 | cg18095732 | rs7333934 | outcome | TRUE | reported | textfile | 0.0100277 | 1e-200 | 20381 | 13 | 21914077 | exposure | TRUE | reported | 2c6eUP | textfile | 2 | 1 | TRUE | NA | 0.00803648338822968 | 165.102337158666 | 419.209342436541 |
| 12 | cg18095732 | rs7336043 | outcome | TRUE | reported | textfile | 0.0161712 | 5.386e-28 | 19373 | 13 | 21917353 | exposure | TRUE | reported | 2c6eUP | textfile | 2 | 1 | TRUE | NA | 0.00617231145319402 | 120.306413815709 | 419.209342436541 |
| 13 | cg18095732 | rs75522825 | outcome | TRUE | reported | textfile | 0.0234346 | 1.009e-10 | 23466 | 13 | 22294708 | exposure | TRUE | reported | 2c6eUP | textfile | 2 | 1 | TRUE | NA | 0.00177827542220581 | 41.7997860388035 | 419.209342436541 |
| 14 | cg18095732 | rs77107022 | outcome | TRUE | reported | textfile | 0.0311219 | 9.4e-103 | 16646 | 13 | 21955635 | exposure | TRUE | reported | 2c6eUP | textfile | 2 | 1 | TRUE | NA | 0.0270764590655177 | 463.202467332244 | 419.209342436541 |
| 15 | cg18095732 | rs77667907 | outcome | TRUE | reported | textfile | 0.050216 | 2.435e-11 | 7221 | 13 | 22013306 | exposure | TRUE | reported | 2c6eUP | textfile | 2 | 1 | TRUE | NA | 0.00613653388969194 | 44.5731628742346 | 419.209342436541 |
| 16 | cg18095732 | rs8000789 | outcome | TRUE | reported | textfile | 0.0115688 | 1e-200 | 22063 | 13 | 21827940 | exposure | TRUE | reported | 2c6eUP | textfile | 2 | 1 | TRUE | NA | 0.00302878793333905 | 67.0210832456065 | 419.209342436541 |
| 17 | cg18095732 | rs9506660 | outcome | TRUE | reported | textfile | 0.0091628 | 1e-200 | 21895 | 13 | 21934601 | exposure | TRUE | reported | 2c6eUP | textfile | 2 | 1 | TRUE | NA | 0.0742802537823518 | 1756.70617668199 | 419.209342436541 |
| 18 | cg18095732 | rs9509659 | outcome | TRUE | reported | textfile | 0.0096283 | 1e-200 | 20141 | 13 | 21924162 | exposure | TRUE | reported | 2c6eUP | textfile | 2 | 1 | TRUE | NA | 0.060857818164814 | 1305.03732419537 | 419.209342436541 |
| 19 | cg18095732 | rs9509664 | outcome | TRUE | reported | textfile | 0.0094358 | 1e-200 | 24156 | 13 | 21932459 | exposure | TRUE | reported | 2c6eUP | textfile | 2 | 1 | TRUE | NA | 0.0660001189128917 | 1706.81699698558 | 419.209342436541 |
| 20 | cg18095732 | rs9580170 | outcome | TRUE | reported | textfile | 0.0137947 | 2.16e-94 | 18532 | 13 | 22186903 | exposure | TRUE | reported | 2c6eUP | textfile | 2 | 1 | TRUE | NA | 0.0224110792779847 | 424.797468770765 | 419.209342436541 |

Supplementary Table S13A & S13B. Instrumental variables for MR analysis of DNA methylation at cg18095732 on ZDHHC20 expression. SNPs were selected from GoDMC mQTL and eQTLGen cis-eQTL data (P < 5×10⁻⁸, F > 10, LD-clumped).

S13A provides harmonized SNP-level data (alleles, betas, SEs, allele frequencies, positions, outcome gene label, and QC flags).

S13B reports instrument strength metrics (exposure SEs, p-values, sample sizes, R², F-statistics, mean F, and data provenance).

Supplementary Table S14: Individual SNP effects of MR Analysis of DNA methylation sites and ZDHHC20

| sites | id.exposure | id.outcome | samplesize | SNP | b | se | p | lo_ci | up_ci | or | or_lci95 | or_uci95 |
| --- | --- | --- | --- | --- | --- | --- | --- | --- | --- | --- | --- | --- |
| cg18095732 | 2c6eUP | O72f5Q | NA | rs112159210 | 0.627296915620488 | 0.0613139524011072 | 1.44173220560428e-24 | 0.507121568914318 | 0.747472262326658 | 1.87254209279617 | 1.66050466116231 | 2.11165555346233 |
| cg18095732 | 2c6eUP | O72f5Q | NA | rs117322839 | 0.456028538793324 | 0.0694202461209792 | 5.06202818931409e-11 | 0.319964856396205 | 0.592092221190443 | 1.577795373 | 1.37707936795385 | 1.80776670932292 |
| cg18095732 | 2c6eUP | O72f5Q | NA | rs143754778 | 0.326149500552608 | 0.0608930939587774 | 8.503745644864e-08 | 0.206799036393405 | 0.445499964711812 | 1.3856225047191 | 1.22973541488268 | 1.56127058092996 |
| cg18095732 | 2c6eUP | O72f5Q | NA | rs261380 | 0.436580223566057 | 0.0804533720751968 | 5.74698252128644e-08 | 0.278891614298671 | 0.594268832833443 | 1.54740637597091 | 1.32166408661721 | 1.81170580077125 |
| cg18095732 | 2c6eUP | O72f5Q | NA | rs2761918 | 0.287765453553366 | 0.0653641007503389 | 1.07010589976288e-05 | 0.159651816082702 | 0.41587909102403 | 1.33344451277051 | 1.17310234450506 | 1.51570259574238 |
| cg18095732 | 2c6eUP | O72f5Q | NA | rs2798281 | -0.493301227 | 0.0727636591045625 | 1.20592497916885e-11 | -0.635917999 | -0.350684455 | 0.610607310013833 | 0.529449231430474 | 0.704205927421936 |
| cg18095732 | 2c6eUP | O72f5Q | NA | rs28719719 | 0.313849314560428 | 0.0237840308704608 | 9.27648118444409e-40 | 0.267232614054324 | 0.360466015066531 | 1.36868348033599 | 1.30634428503119 | 1.43399752332511 |
| cg18095732 | 2c6eUP | O72f5Q | NA | rs4770150 | -0.533445795 | 0.0564899393545707 | 3.61565058280628e-21 | -0.644166076 | -0.422725514 | 0.586580247824495 | 0.525100253040647 | 0.655258467588686 |
| cg18095732 | 2c6eUP | O72f5Q | NA | rs55732512 | 0.595447189675096 | 0.101763230337719 | 4.87745545140453e-09 | 0.395991258213167 | 0.794903121137026 | 1.8138418949901 | 1.48585632845533 | 2.21422647466968 |
| cg18095732 | 2c6eUP | O72f5Q | NA | rs73153989 | 0.356237567681895 | 0.0366205686467542 | 2.29502714776142e-22 | 0.284461253134257 | 0.428013882229533 | 1.42794674196888 | 1.3290458159425 | 1.53420737903873 |
| cg18095732 | 2c6eUP | O72f5Q | NA | rs7333934 | -0.037300791 | 0.0631788464406829 | 0.554922510596127 | -0.16113133 | 0.0865297480851593 | 0.963386313889835 | 0.851180278292565 | 1.09038380406558 |
| cg18095732 | 2c6eUP | O72f5Q | NA | rs7336043 | 0.00922365874000517 | 0.0722291209084196 | 0.89838639009322 | -0.132345418 | 0.150792735720508 | 1.00926632776757 | 0.876038343188528 | 1.16275563539599 |
| cg18095732 | 2c6eUP | O72f5Q | NA | rs75522825 | 0.459324305992461 | 0.140996502438058 | 0.00112319078893563 | 0.182971161213867 | 0.735677450771055 | 1.58300399722819 | 1.20077977855027 | 2.08689528255204 |
| cg18095732 | 2c6eUP | O72f5Q | NA | rs77107022 | -0.22185226 | 0.0387901071992991 | 1.06963794761831e-08 | -0.29788087 | -0.14582365 | 0.801033700227781 | 0.7423897752139 | 0.864310110838654 |
| cg18095732 | 2c6eUP | O72f5Q | NA | rs77667907 | -0.314019806 | 0.0890003135164964 | 0.000418237863662865 | -0.488460421 | -0.139579192 | 0.730504559511159 | 0.613570307544632 | 0.869724145554054 |
| cg18095732 | 2c6eUP | O72f5Q | NA | rs8000789 | 0.975110530606026 | 0.105454976435488 | 2.31530484186376e-20 | 0.76841877679247 | 1.18180228441958 | 2.65146026229638 | 2.15635387983502 | 3.26024479946431 |
| cg18095732 | 2c6eUP | O72f5Q | NA | rs9506660 | 0.447089878391413 | 0.0208603699237799 | 6.65112683706208e-102 | 0.406203553340804 | 0.487976203442021 | 1.56375484074015 | 1.50110807692567 | 1.62901608453563 |
| cg18095732 | 2c6eUP | O72f5Q | NA | rs9509659 | -0.048088371 | 0.0230794637331759 | 0.0371965670178641 | -0.09332412 | -0.002852622 | 0.953049561761606 | 0.910898212524377 | 0.997151443141823 |
| cg18095732 | 2c6eUP | O72f5Q | NA | rs9509664 | 0.244039234639029 | 0.0223162392793223 | 7.79749488561151e-28 | 0.200299405651557 | 0.287779063626501 | 1.27639440838093 | 1.22176850779981 | 1.33346266117135 |
| cg18095732 | 2c6eUP | O72f5Q | NA | rs9580170 | 0.093986810596461 | 0.0397155337403175 | 0.0179571742627653 | 0.0161443644654387 | 0.171829256727483 | 1.09854525666493 | 1.01627538886971 | 1.18747506252533 |
| cg18095732 | 2c6eUP | O72f5Q | NA | All - Inverse variance weighted | 0.201433328485889 | 0.0613574757908178 | 0.00102728052186943 | 0.0811726759358866 | 0.321693981035892 | 1.22315468476941 | 1.08455815749344 | 1.37946256965238 |
| cg18095732 | 2c6eUP | O72f5Q | NA | All - MR Egger | 0.275345499019068 | 0.136584350420502 | 0.058983117078978 | 0.00764017219488466 | 0.543050825843251 | 1.31698561351026 | 1.00766943278164 | 1.72125009429442 |

Supplementary Table S14. Variant-level MR associations of cg18095732 methylation with ZDHHC20 expression. Estimates include beta, standard error, p-value, and OR with 95% CI for each instrumental SNP..

Supplementary Table S15: Results of MR Analysis of DNA methylation sites and ZDHHC20

| site | method | nsnp | b | se | pval | lo_ci | up_ci | or | or_lci95 | or_uci95 |
| --- | --- | --- | --- | --- | --- | --- | --- | --- | --- | --- |
| cg18095732 | MR Egger | 20 | 0.275345499019068 | 0.136584350420502 | 0.058983117078978 | 0.00764017219488466 | 0.543050825843251 | 1.31698561351026 | 1.00766943278164 | 1.72125009429442 |
| cg18095732 | Weighted median | 20 | 0.262027380038824 | 0.0198280498536213 | 7.19007162920531e-40 | 0.223164402325727 | 0.300890357751922 | 1.29956212400368 | 1.25002606403613 | 1.35106120002962 |
| cg18095732 | Inverse variance weighted | 20 | 0.201433328485889 | 0.0613574757908178 | 0.00102728052186943 | 0.0811726759358866 | 0.321693981035892 | 1.22315468476941 | 1.08455815749344 | 1.37946256965238 |
| cg18095732 | Simple mode | 20 | 0.371186402393779 | 0.0341362248483143 | 1.34315837304127e-09 | 0.304279401691083 | 0.438093403096475 | 1.44945322975866 | 1.35564777346049 | 1.54974965207587 |
| cg18095732 | Weighted mode | 20 | 0.294735198284978 | 0.0236909611212376 | 1.40535735050852e-10 | 0.248300914487352 | 0.341169482082604 | 1.34277074360882 | 1.2818456000762 | 1.40659161273762 |

Supplementary Table S15. MR estimates for cg18095732 methylation on ZDHHC20 expression across multiple methods. Results are reported for IVW (primary), MR-Egger, weighted median, simple mode, and weighted mode, including beta, standard error, p-value, 95% CI, and OR.
